# Supplementary material for: Aspirin vs. ibuprofen: unveiling the distinct cyclooxygenase-1/2 behaviour and dual efficacy of their synthesized analogues via molecular modeling and in vitro biological assessment
Source: Royal Society of Chemistry journal article supplement (doi:10.1039/d4md00751d), 2025-01-01
Supplement: d4md00751d1.pdf [file d4md00751d1.pdf]

## SUPPORTING INFORMATION

### **Aspirin Vs Ibuprofen: Unveiling Distinct Cyclooxygenase-1/2 Behaviour and Dual Efficacy of Their Synthesized Analogues via Molecular Modeling and *In-Vitro* Biological Assessment**

Amandeep Kaur <sup>a</sup>, Hafiz Muzzammel Rehman <sup>b</sup>, Vipin Kumar Mishra <sup>c</sup>, Gurmeet Kaur <sup>a</sup>, Mandeep Kaur <sup>a</sup>, Mohammad K. Okla <sup>d</sup>, Masaud shah <sup>e</sup>, Manisha Bansal <sup>a\*</sup>

<sup>a</sup> Synthetic and Medicinal Chemistry Laboratory, Department of Chemistry, Punjabi University, Patiala-147002, India.

<sup>b</sup> School of Biochemistry and Biotechnology, University of the Punjab, Lahore, Punjab, Pakistan.

<sup>c</sup> Department of Chemistry, VIT Bhopal University, Bhopal.

<sup>d</sup> Botany and Microbiology Department, College of Science, King Saud University, P.O. Box 2455, Riyadh 11451, Saudi Arabia.

<sup>e</sup> Department of Physiology, Ajou University, South Korea.

\*Corresponding author

*Department of Chemistry, Punjabi University, Patiala 147002, India.*

E-mail: [jindal\\_manisha@yahoo.co.in](mailto:jindal_manisha@yahoo.co.in)

**Scheme S1.** Synthesis of intermediate (iii)

**Figure S1.** IR, <sup>1</sup>H-NMR, <sup>13</sup>C-NMR and HRMS spectra of Compound 1.

**Figure S2.** IR, <sup>1</sup>H-NMR, <sup>13</sup>C-NMR and HRMS spectra of Compound 2.

**Figure S3.** IR, <sup>1</sup>H-NMR, <sup>13</sup>C-NMR and HRMS spectra of Compound 3.

**Figure S4.** IR, <sup>1</sup>H-NMR, <sup>13</sup>C-NMR and HRMS spectra of Compound 4.

**Figure S5.** IR, <sup>1</sup>H-NMR, <sup>13</sup>C-NMR and HRMS spectra of Compound 6.

**Figure S6.** IR, <sup>1</sup>H-NMR, <sup>13</sup>C-NMR and HRMS spectra of Compound 7.

**Figure S7.** IR, <sup>1</sup>H-NMR, <sup>13</sup>C-NMR and HRMS spectra of Compound 8.

**Figure S8.** IR, <sup>1</sup>H-NMR, <sup>13</sup>C-NMR and HRMS spectra of Compound 11.

**Figure S9.** IR, <sup>1</sup>H-NMR, <sup>13</sup>C-NMR and HRMS spectra of Compound 12.

**Figure S10.** List of compounds with inappropriate ADMET profile.

**Figure S11.** 2D diagram showing the redocked poses of celecoxib in the binding pocket of COX-1 and COX-2.

**Figure S12.** Orientation of celecoxib within the side pocket and main catalytic pocket of COX-2

**Figure S13.** (A) 3D diagram showing penetration of celecoxib (red), aspirin (green) and ibuprofen (pink) in the side pocket of COX-2. 2D representations of predicted binding modes of celecoxib (B), ibuprofen (C) and aspirin (D).

**Figure S14.** 2D interaction diagrams of aspirin and ibuprofen with the key residues of COX-1 binding pocket.

**Figure S15.** Correlation of Normalized Docking Score and number of heavy atoms

**Figure S16.** RMSD plots of compounds 3, 12, and Aspirin with COX-1 during the 2<sup>nd</sup> (A) and 3<sup>rd</sup> (B) replica Simulation.

**Figure S17.** RMSD plots of compounds 3, 12, and Aspirin with COX-2 during the 2<sup>nd</sup> (A) and 3<sup>rd</sup> (B) replica Simulation.

**Figure S18.** RMSF plots of compounds 3 (red), 12 (green), and aspirin (black) with COX-1 during the 2<sup>nd</sup> (A) and 3<sup>rd</sup> (B) replica Simulation.

**Figure S19.** RMSF plots of compounds 3 (red), 12 (green), and aspirin (black) with COX-2 during the 2<sup>nd</sup> (A) and 3<sup>rd</sup> (B) replica Simulation.

**Figure S20.** The hydrogen bonding population graph between inhibitors and COX-1 in three replicas of 100 ns Simulations .

**Figure S21:** The hydrogen bonding population graph between inhibitors and COX-2 in three replicas of 100 ns Simulations.

**Figure S22.** Cumulative diagram of RMSD, RMSF, and binding-free energy of compounds 3, 12, and aspirin with COX-1 and COX-2 during three replica simulations

**Figure S23.** Data for the calculation of IC50 value of compounds 3, 12, and aspirin with COX-1 enzyme.

**Figure S24.** Data for the calculation of IC50 value of compounds 3, 12, and aspirin with COX-2 enzyme.

**Figure S25.** Data for the calculation of IC50 value of compounds 3, 12, and aspirin for the antiplatelet activity.

**Figure S26.** Structures of newly synthesized compounds with numbering.

- Table S1.** ADMET features of compounds other than those selected for synthesis.
- Table S2.** Predicted physicochemical, medicinal, excretion and toxicological parameters from SwissADME, Osiris DataWarrior and ADMETlab tools
- Table S3.** Interactions of compounds 3,12, aspirin, ibuprofen, and celecoxib with COX-1 from Discovery Studio Visualizer
- Table S4.** Interactions of compounds 3,12, aspirin, ibuprofen, and celecoxib with COX-2 from Discovery Studio Visualizer
- Table S5.** Average RMSD analysis of compounds 3, 12, and aspirin with COX-1 and COX-2 isozymes during the three replicas.
- Table S6.** Average RMSF analysis of compounds 3, 12, and aspirin with COX-1 and COX-2 isozymes during the three replicas.
- Table S7.** Binding free energy components of COX-1 and Aspirin.
- Table S8.** Binding free energy components of *COX-1*, and Compound 3.
- Table S9.** Binding free energy components of COX-1 and Compound 12.
- Table S10.** Binding free energy components of *COX-2* and Aspirin.
- Table S11.** Binding free energy components of *COX-2* and Compound 3
- Table S12.** Binding free energy components of *COX-2* and Compound12
- Table S13.** Average Binding free energy (kcal/mol) and Docking Energy of Com3, Com12, and Aspirin with COX-1/COX-2 enzyme.
- Table S14.** The percentage inhibition of compounds 3 , 12, and aspirin against COX-1 and COX-2 enzymes at specific concentrations
- Table S15.** Percentage inhibition of compounds 3, 12, and aspirin on AA-induced platelet aggregation at specific concentrations
- Table S16.** SMILEs for compounds are given in the manuscript.

**Scheme S1.** Synthesis of intermediate (iii)

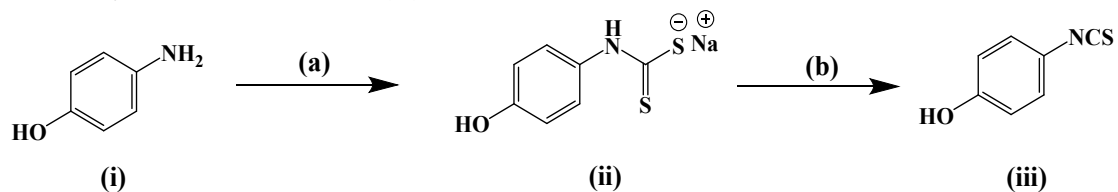

**Reagents and conditions:** (a) CS<sub>2</sub>, acetone, sodium acetate, rt, stirring 4-5 h; (b) FeCl<sub>3</sub>, acetone, sodium acetate, rt, stirring 4-5 h.

**Figure S1.** IR, <sup>1</sup>H-NMR, <sup>13</sup>C-NMR, and HRMS spectra of Compound 1

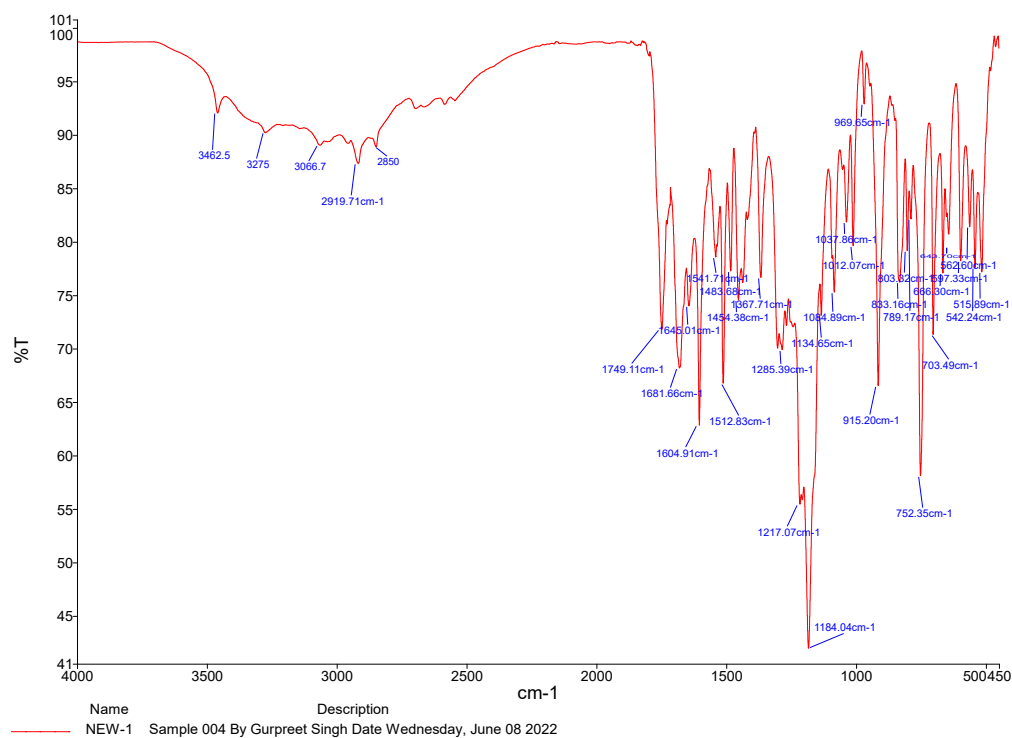

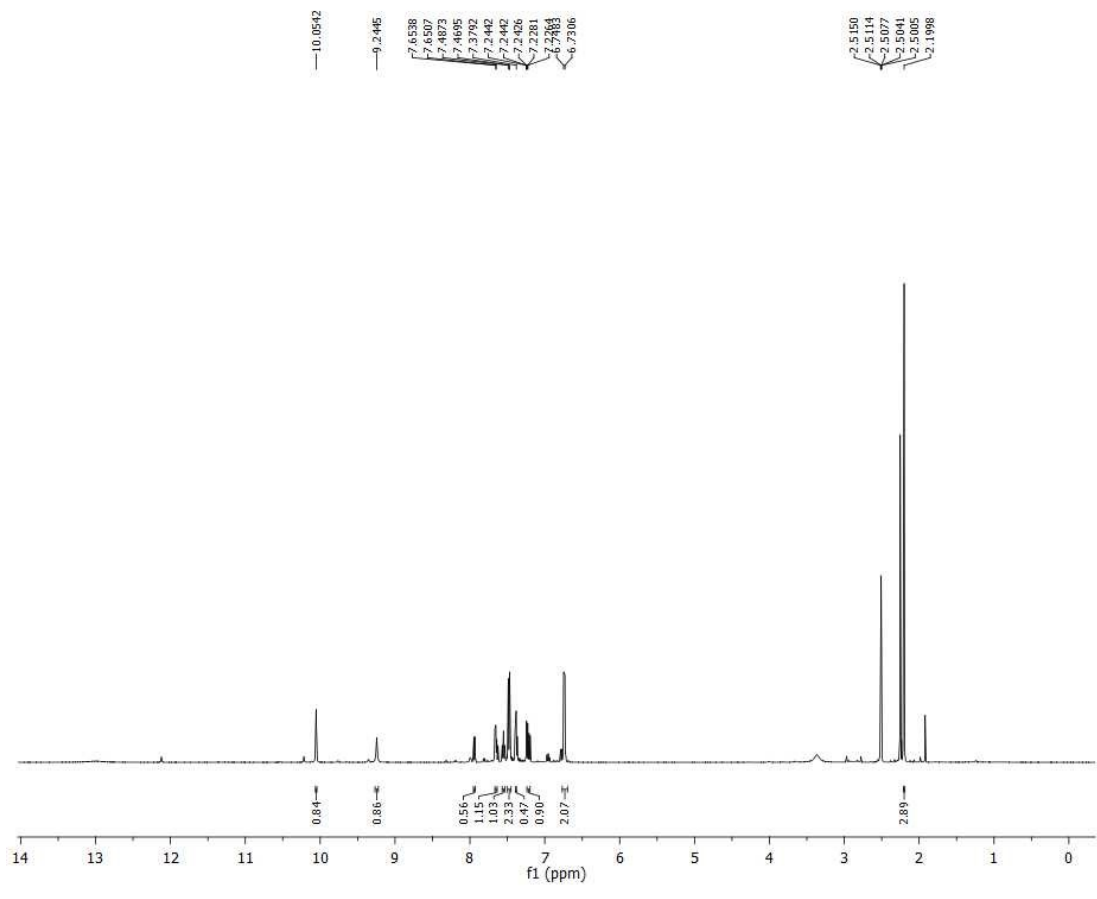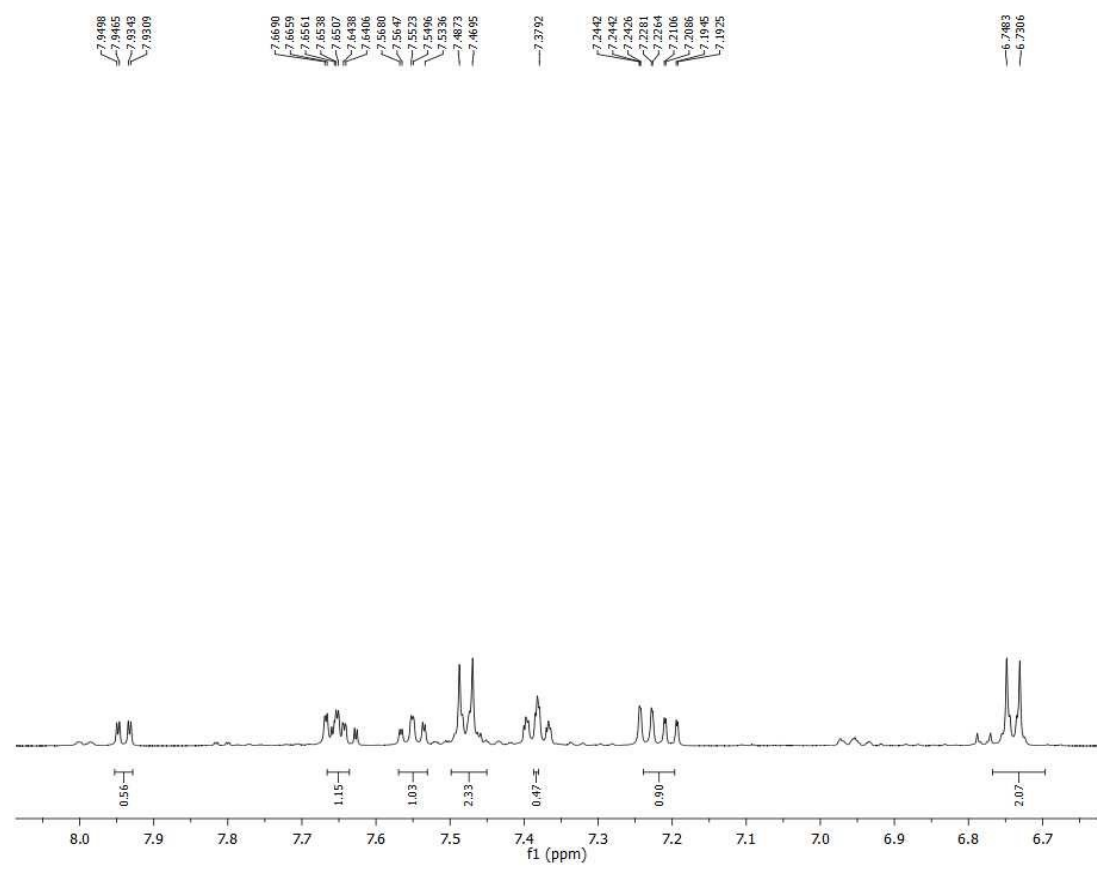

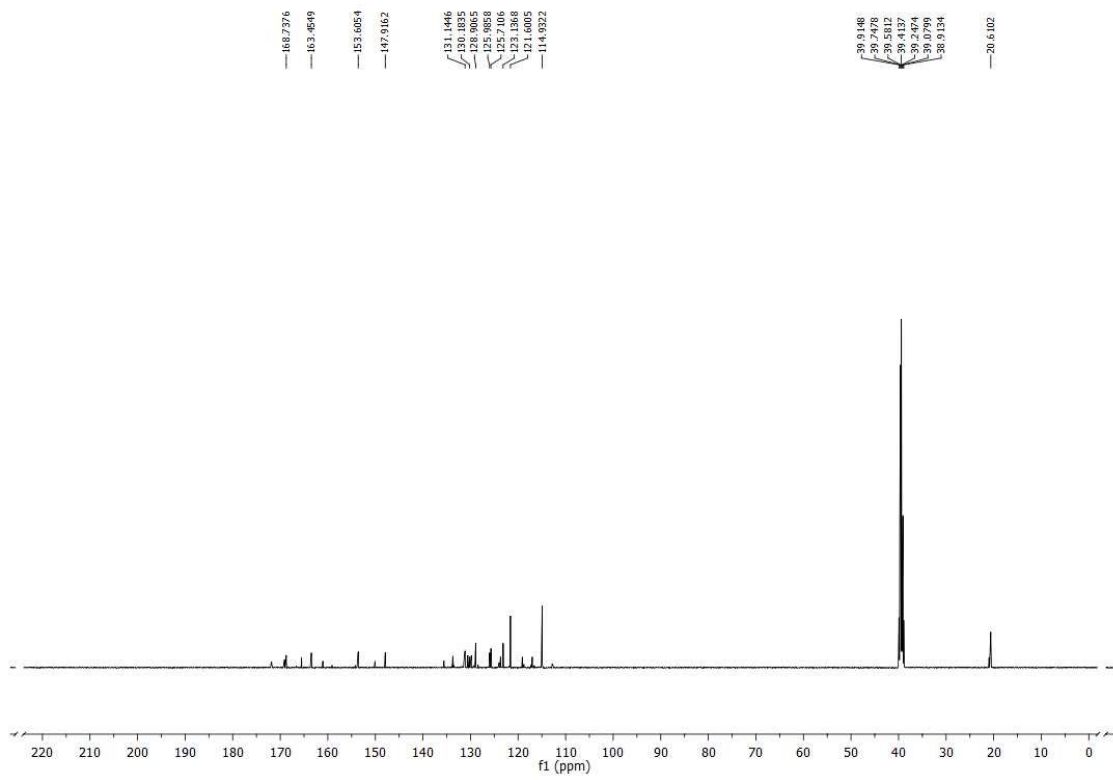

SAIF, PANJAB UNIVERSITY CHANDIGARH

SYNAPT-XS#DBA064

11-Jul-2022  
12:58:26  
1: TOF MS ES+  
2.68e7

AMANDEEP NEW 5 (0.121) Cm (4.7)

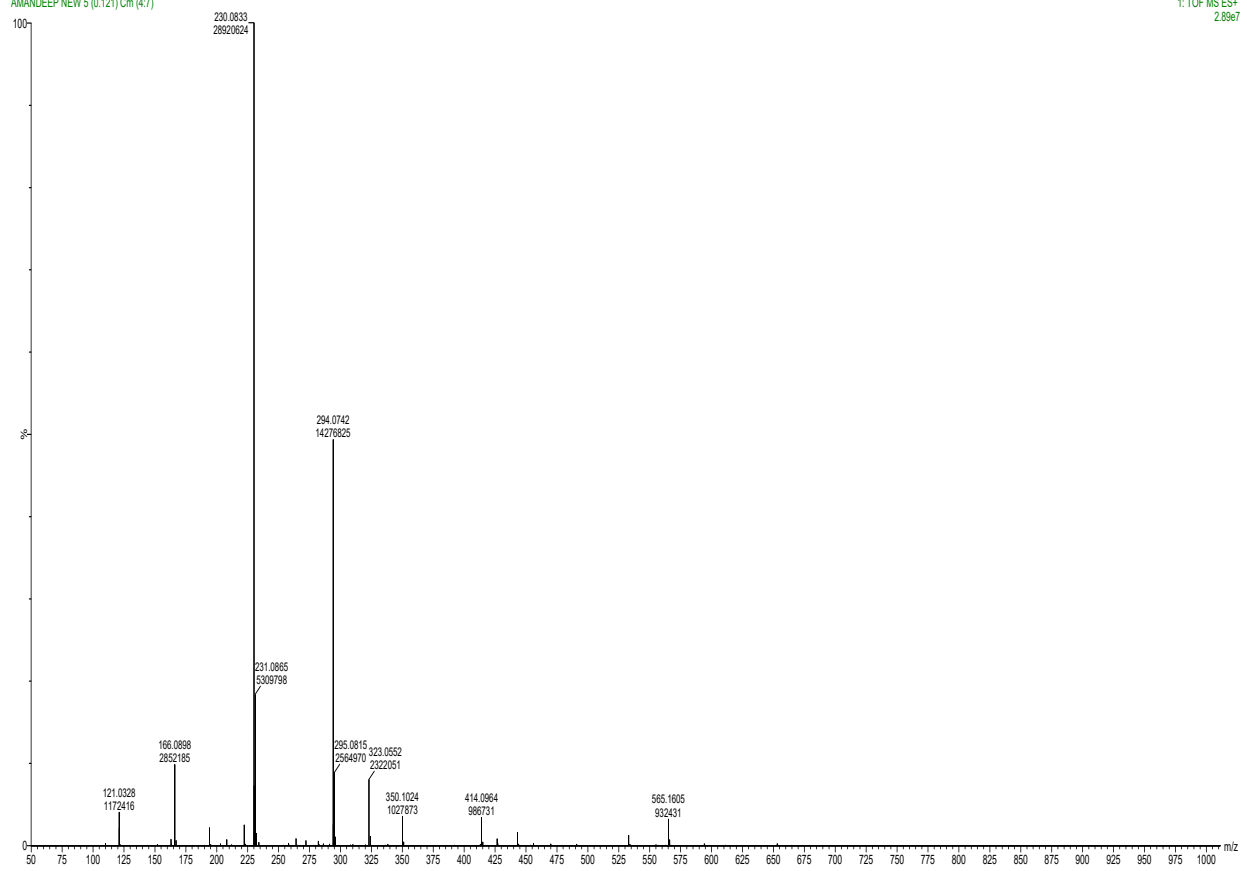

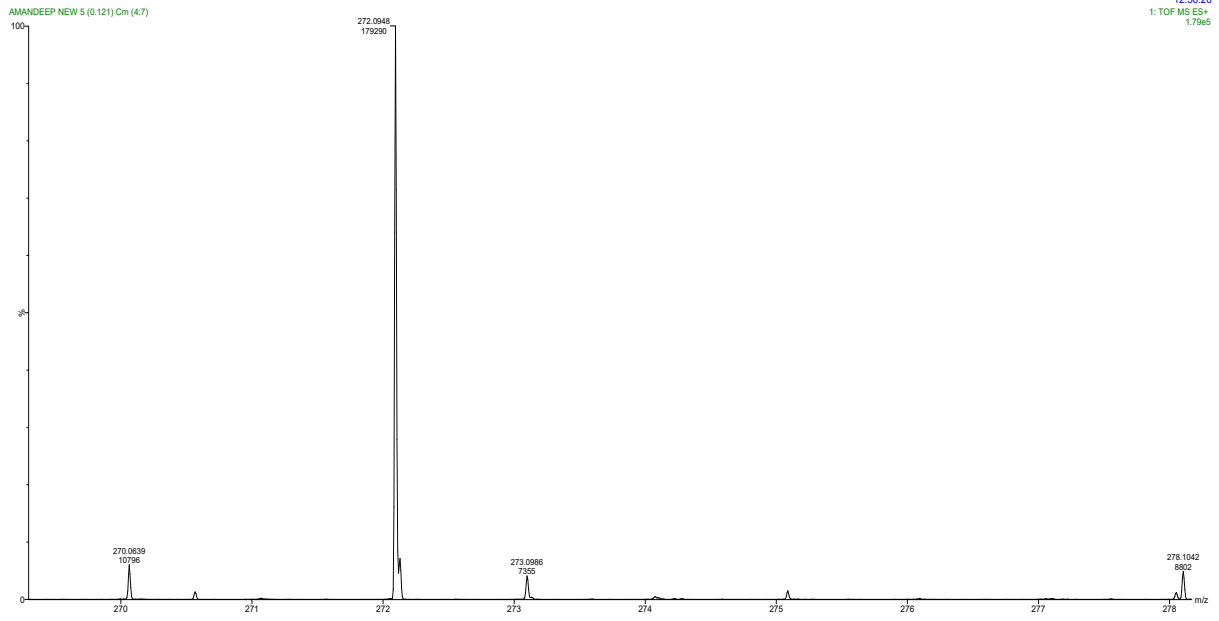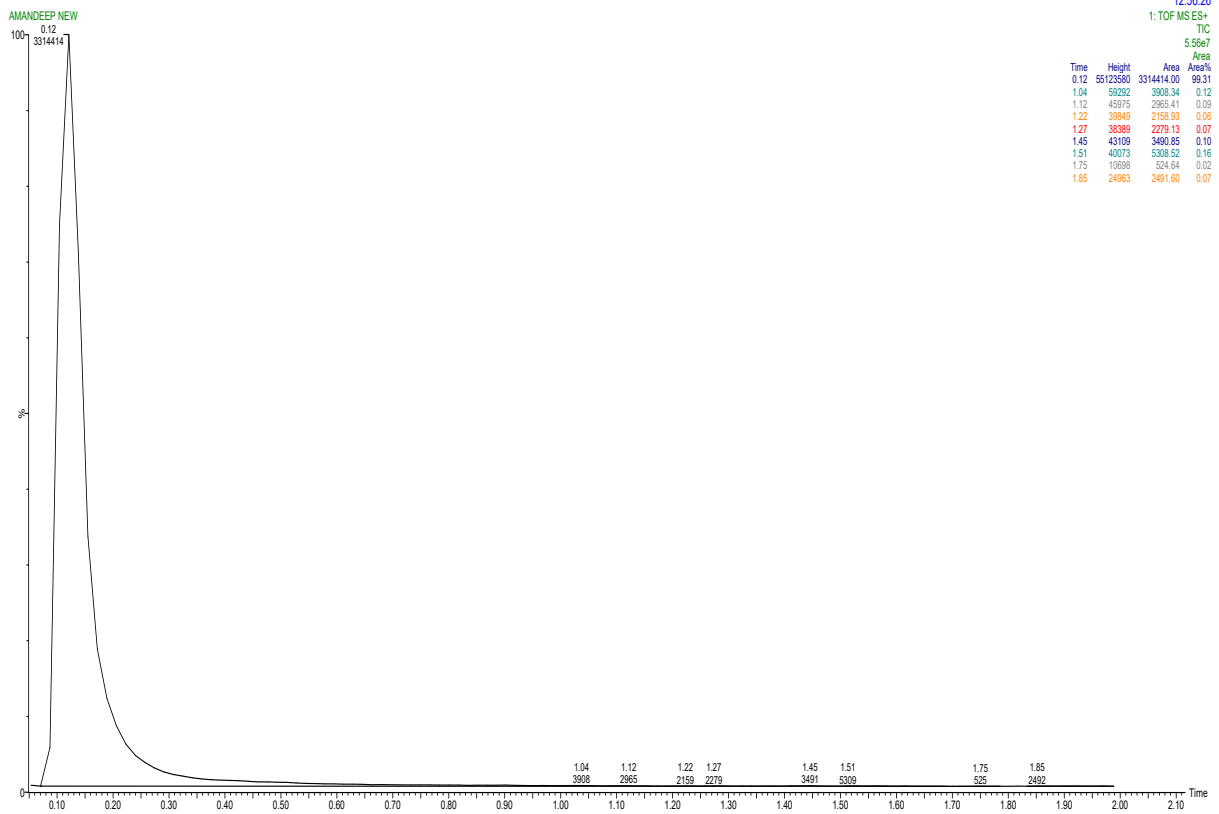



**Figure S2.** IR, <sup>1</sup>H-NMR, <sup>13</sup>C-NMR, and HRMS spectra of Compound 2.

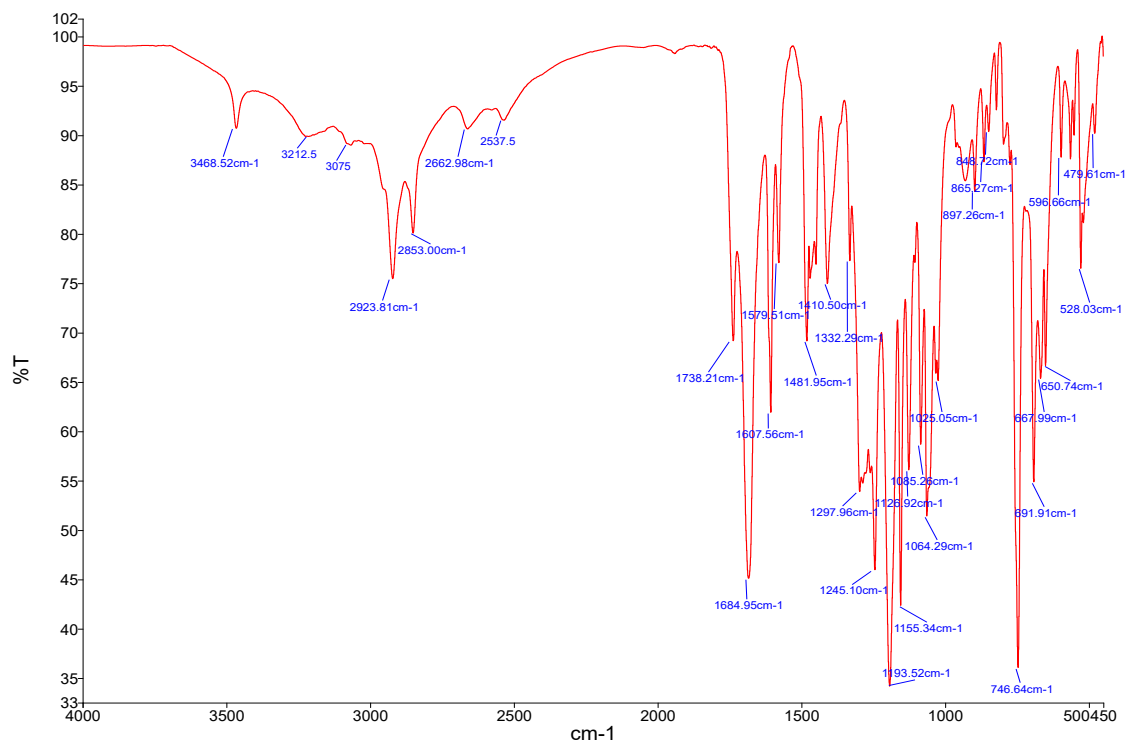

Name: STU  
 Description: Sample 115 By Gurpreet Singh Date Friday, September 30 2022

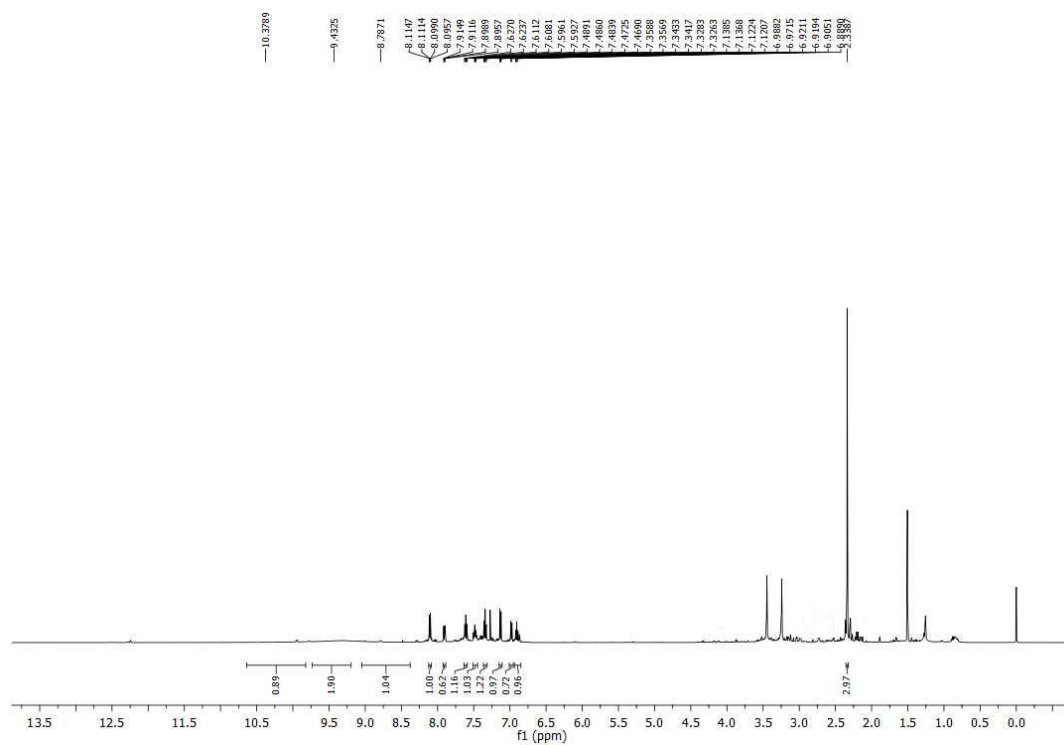

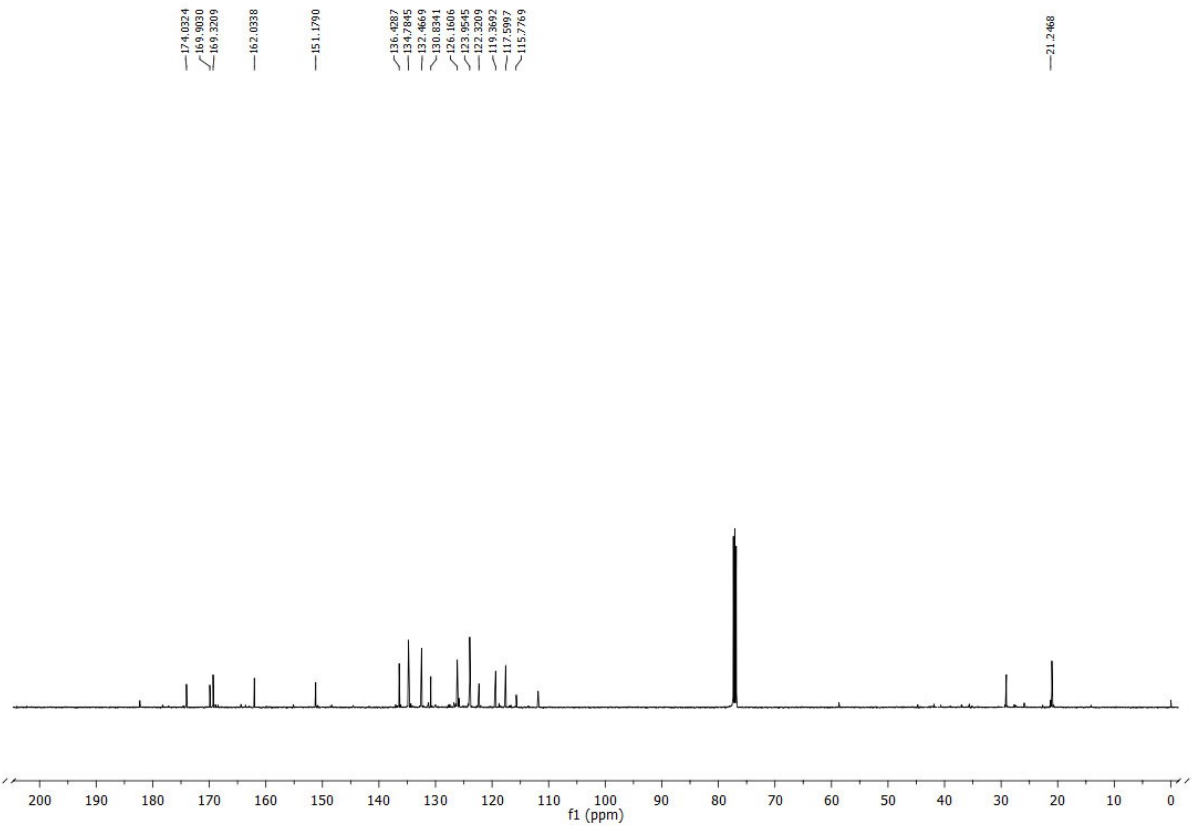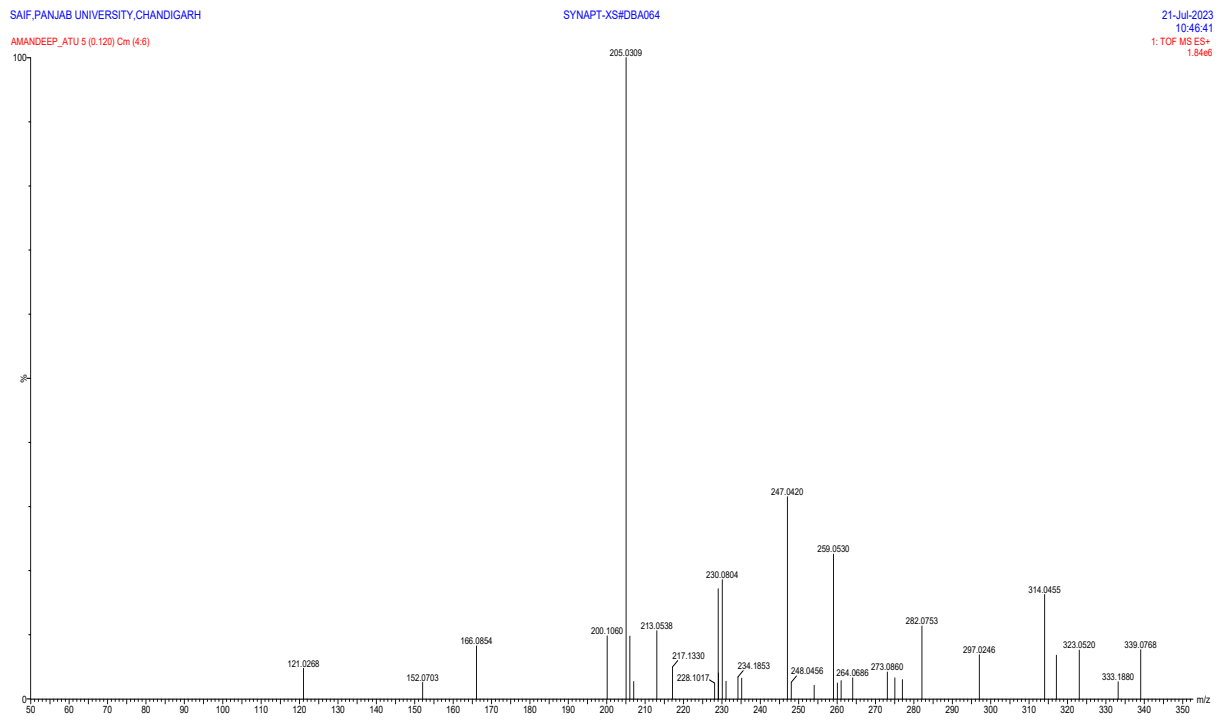

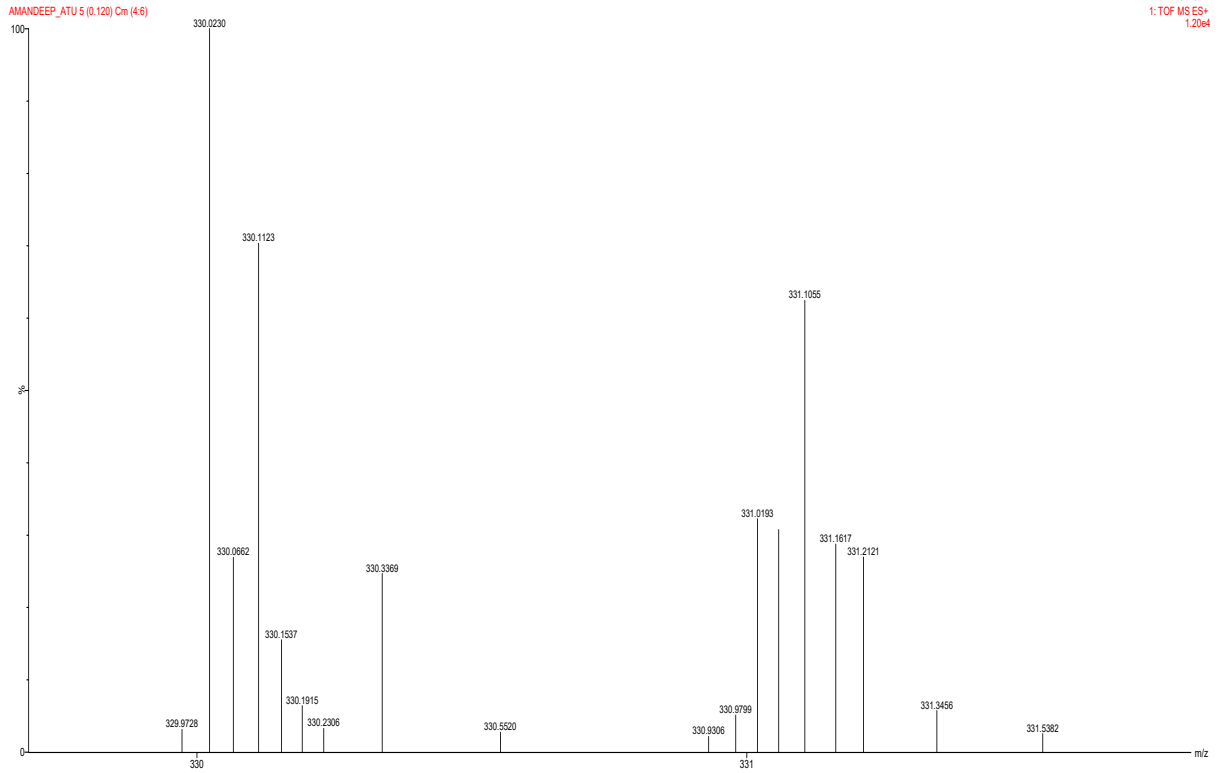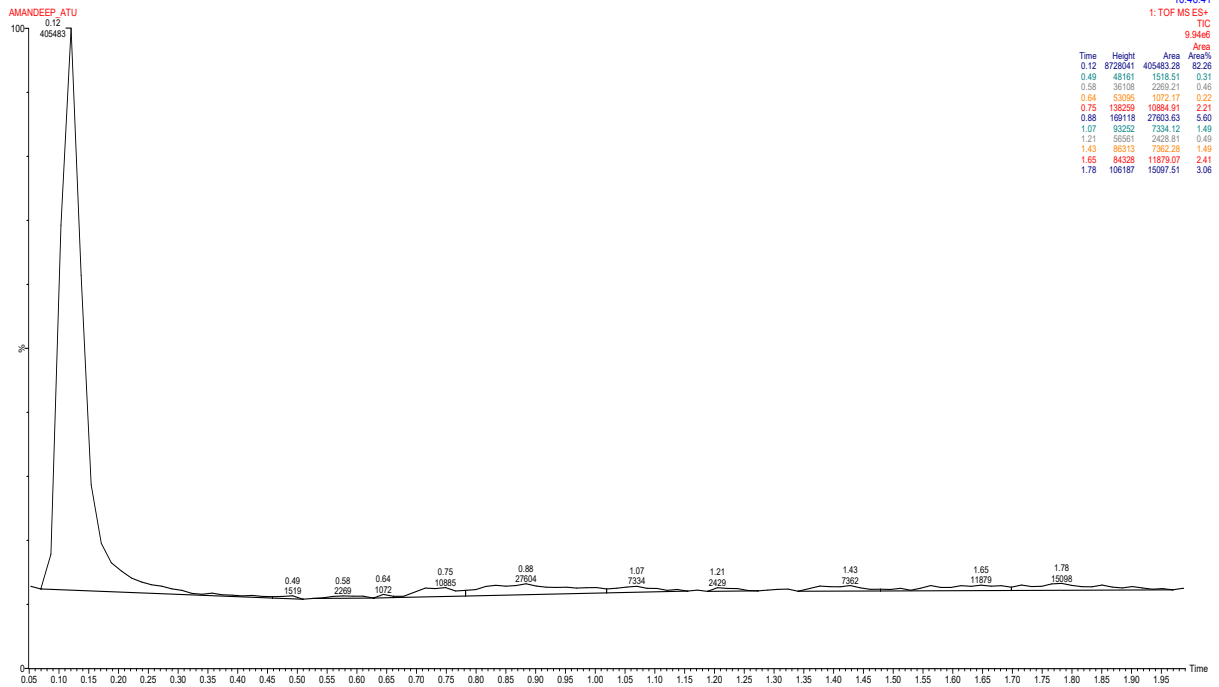

**Figure S3.** IR, <sup>1</sup>H-NMR, <sup>13</sup>C-NMR, and HRMS spectra of Compound 3.

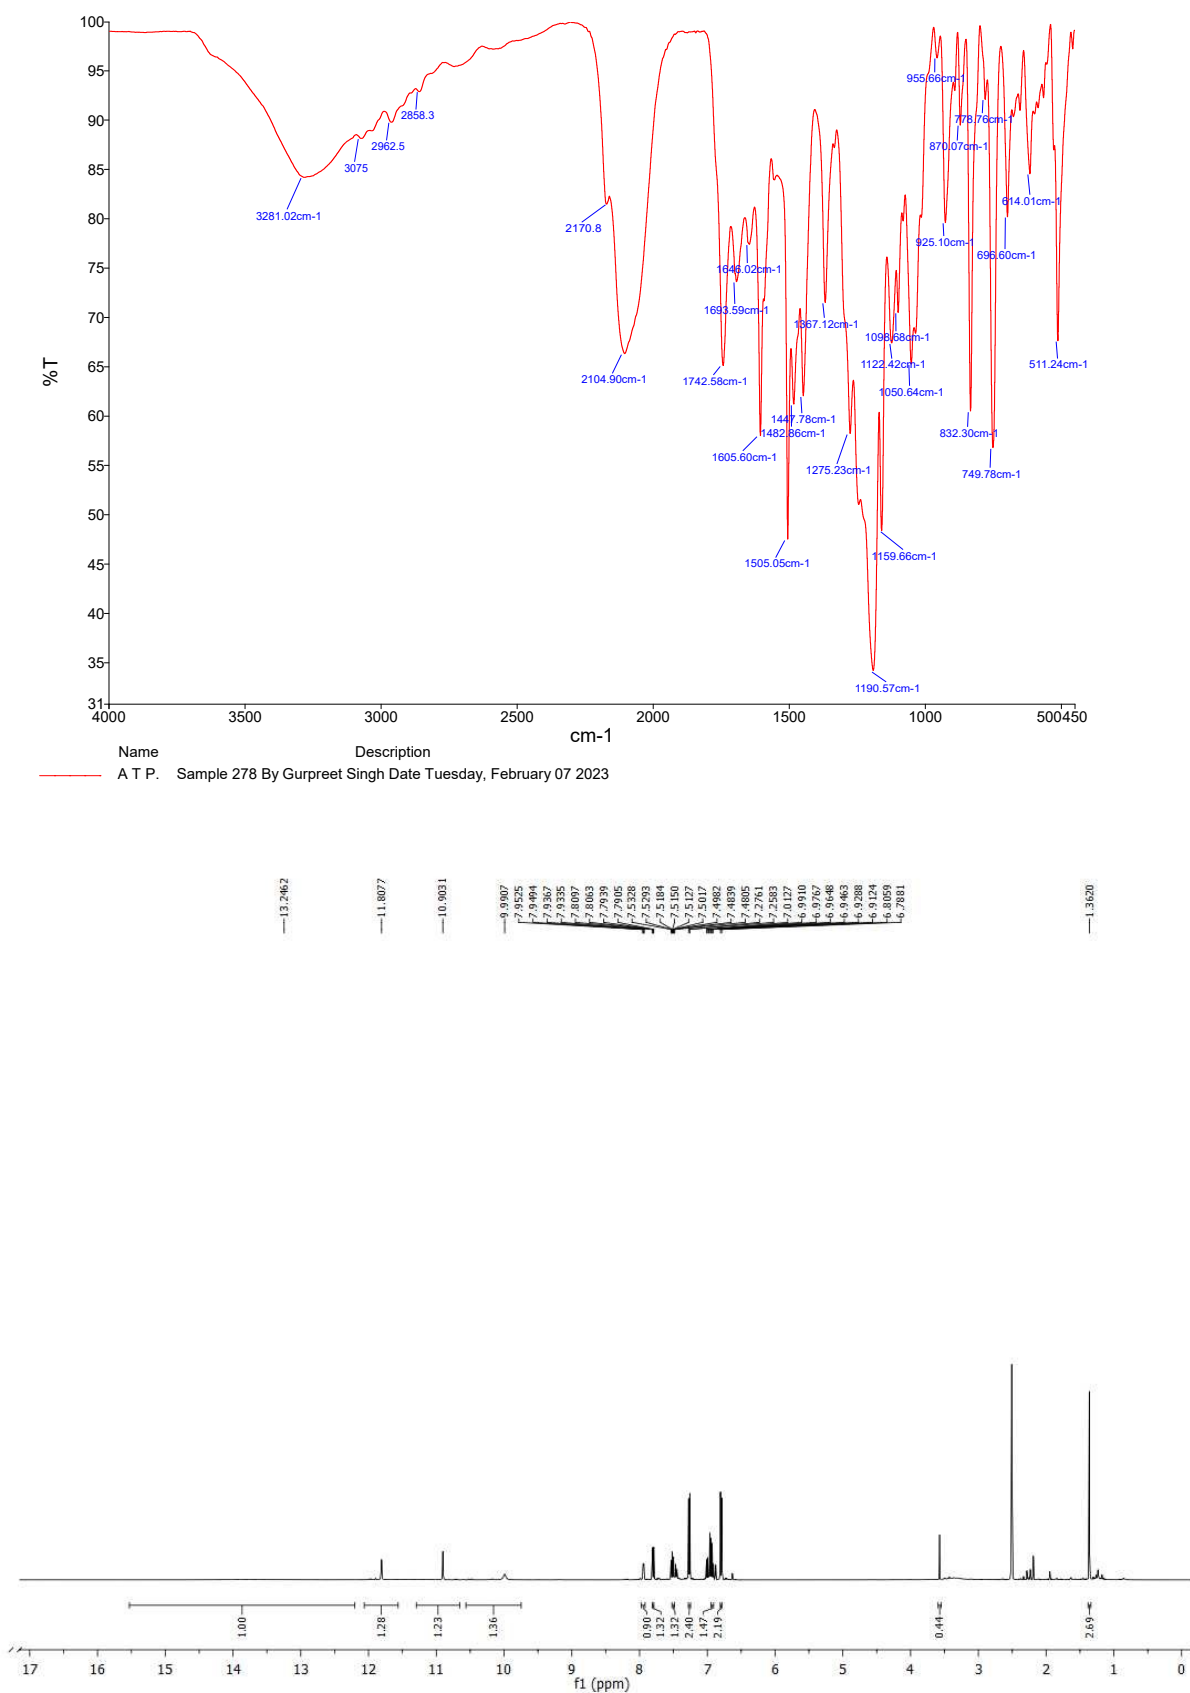

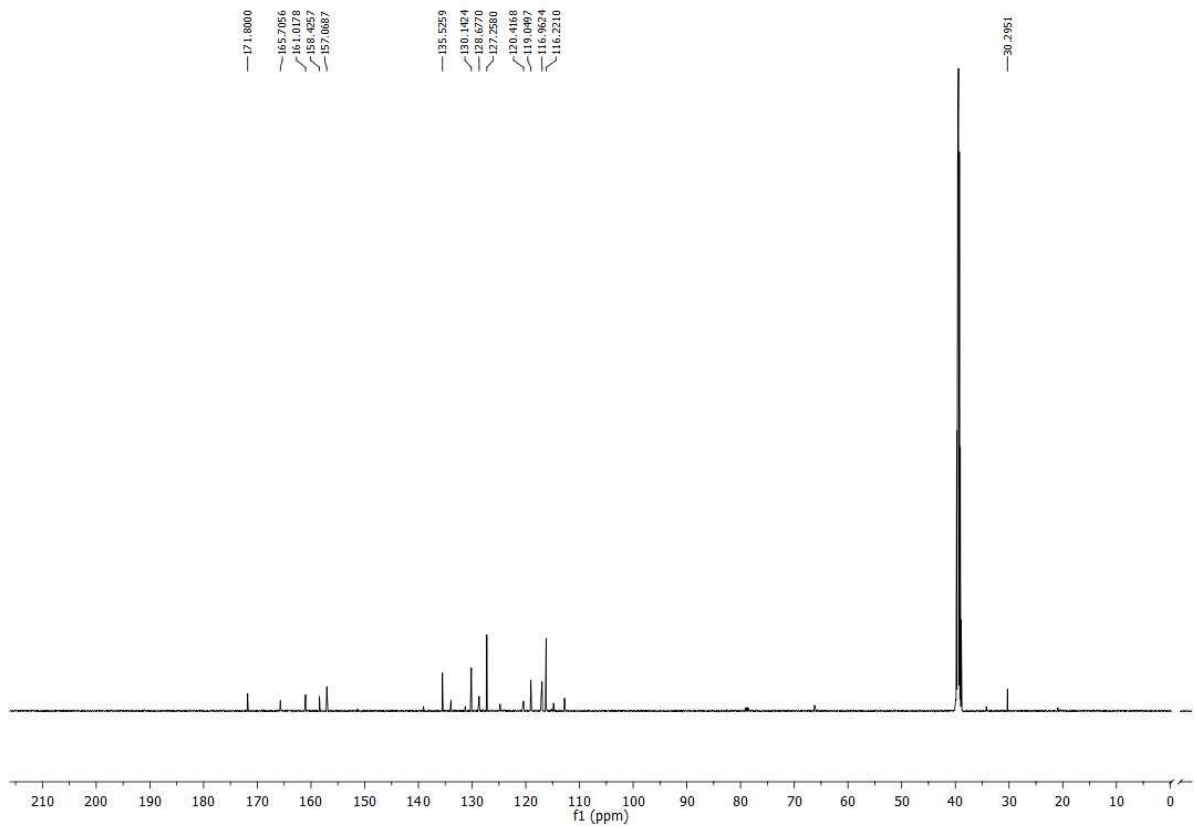

SAIF\_PANJAB UNIVERSITY, CHANDIGARH

SYNAPT-XS#DBA064

28-Apr-2023

AMANDEEP\_ATP 5 (0.110) Cm (4.8)

12:26:54

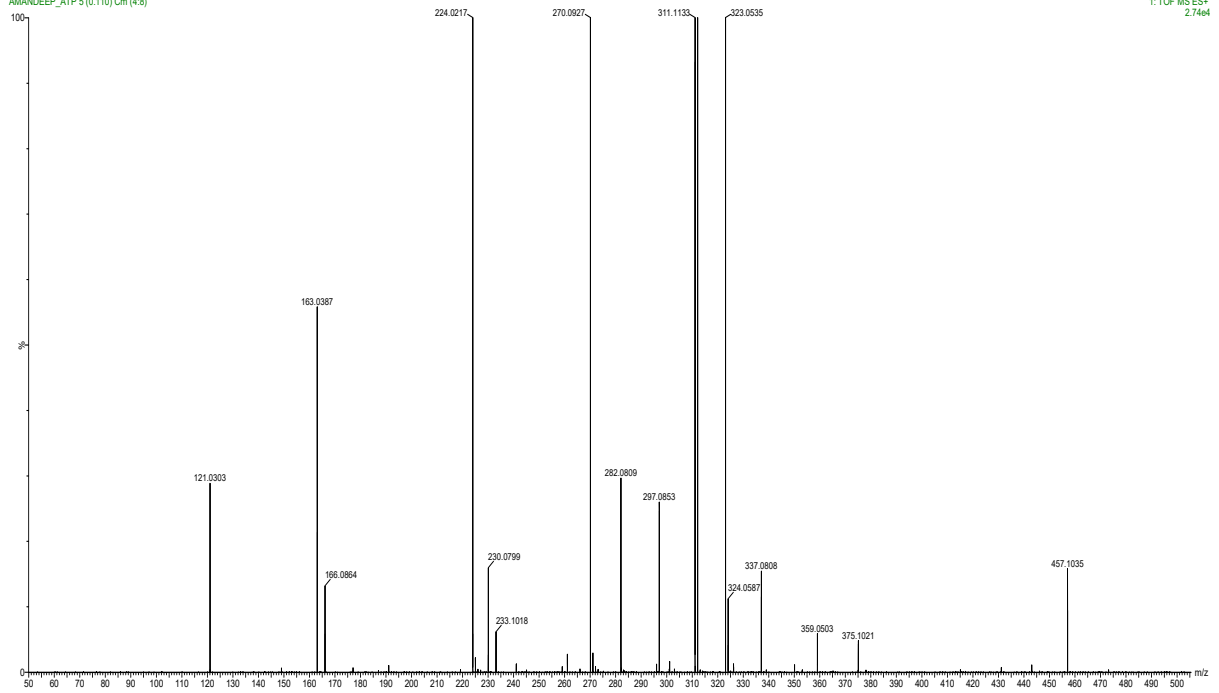

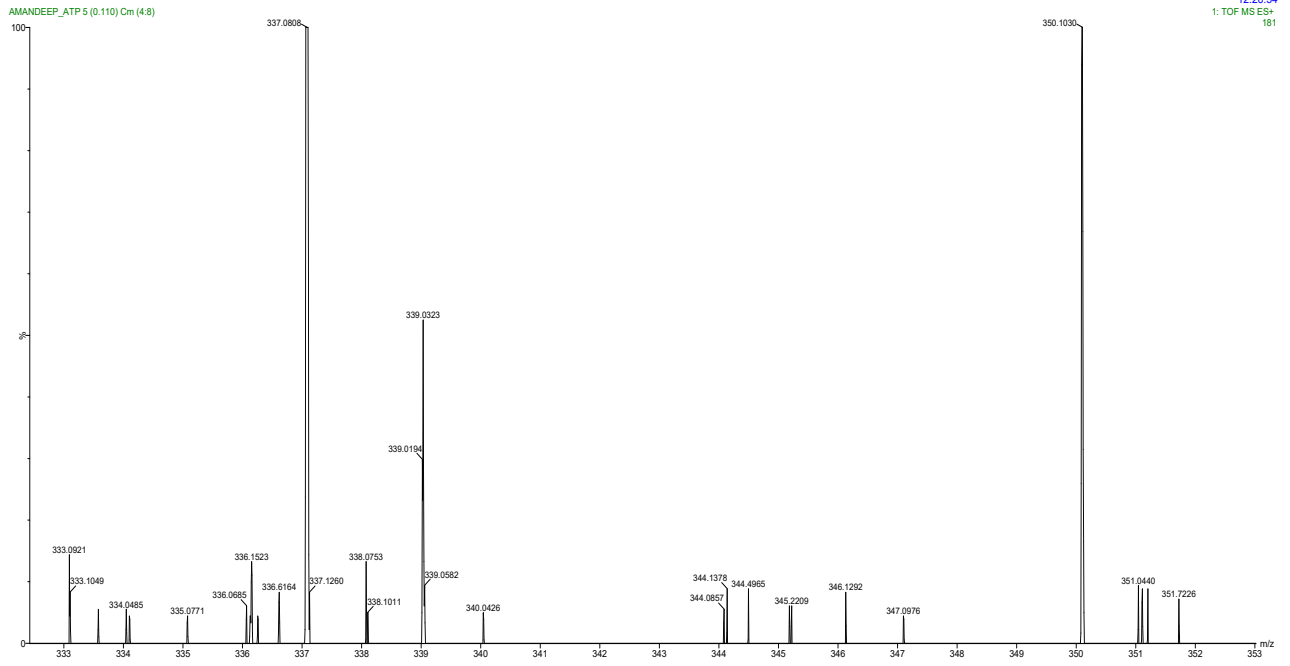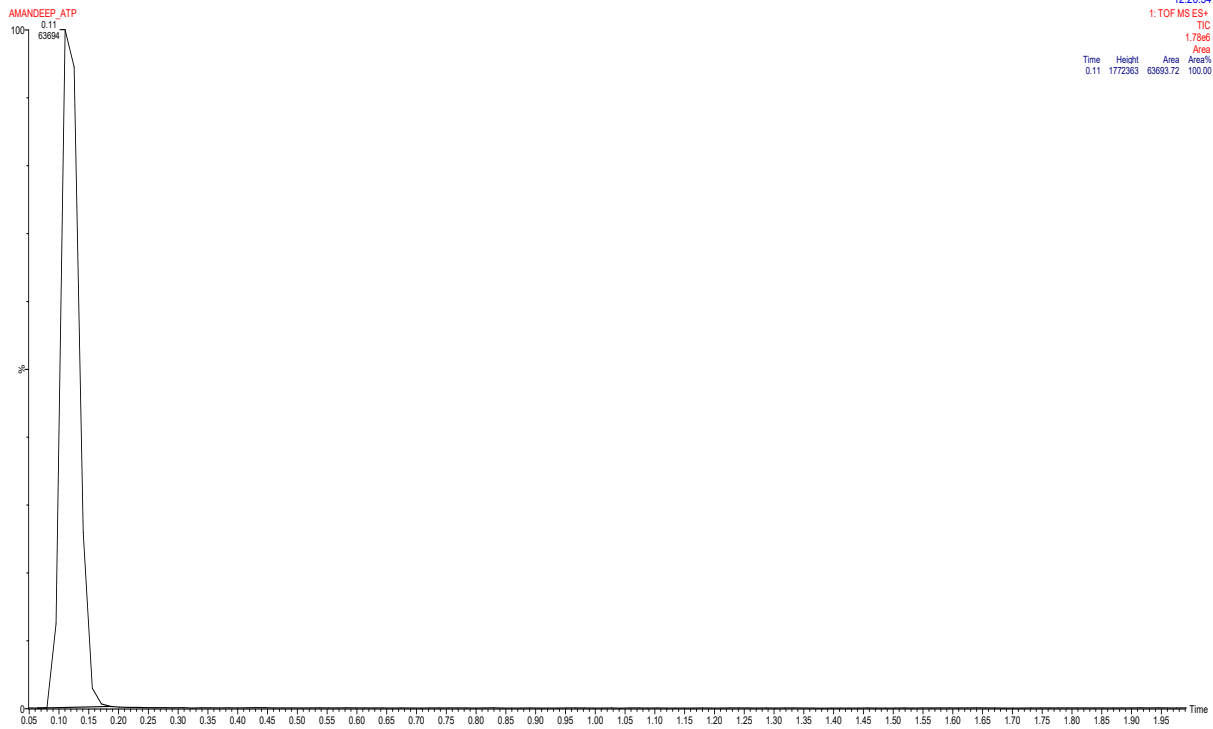

**Figure S4.**  $^1\text{H-NMR}$ ,  $^{13}\text{C-NMR}$ , and HRMS spectra of Compound 4

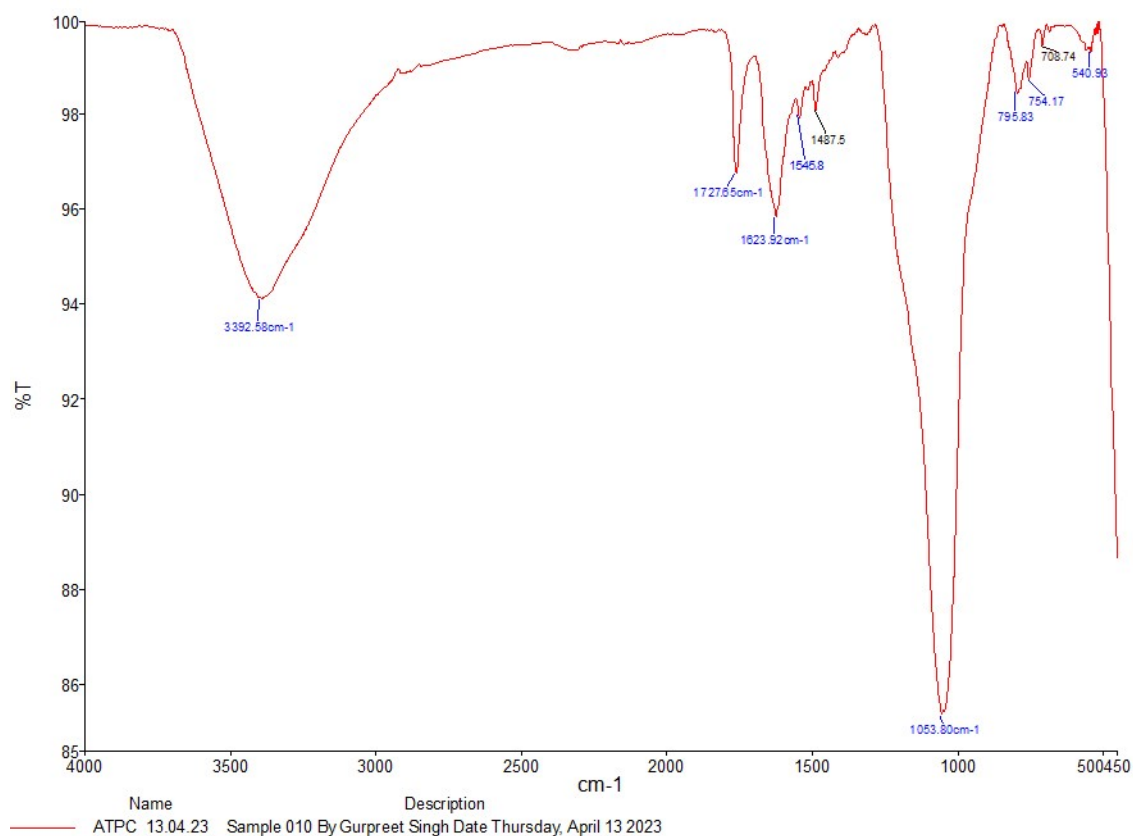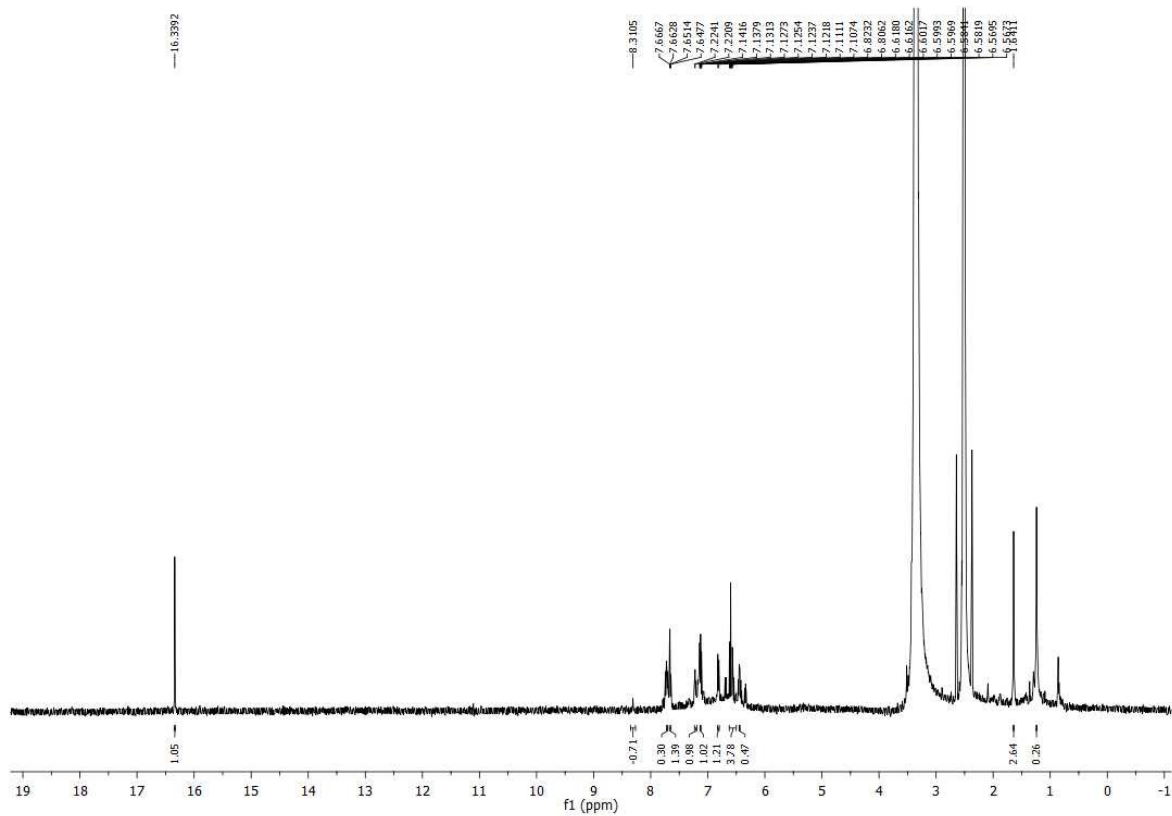

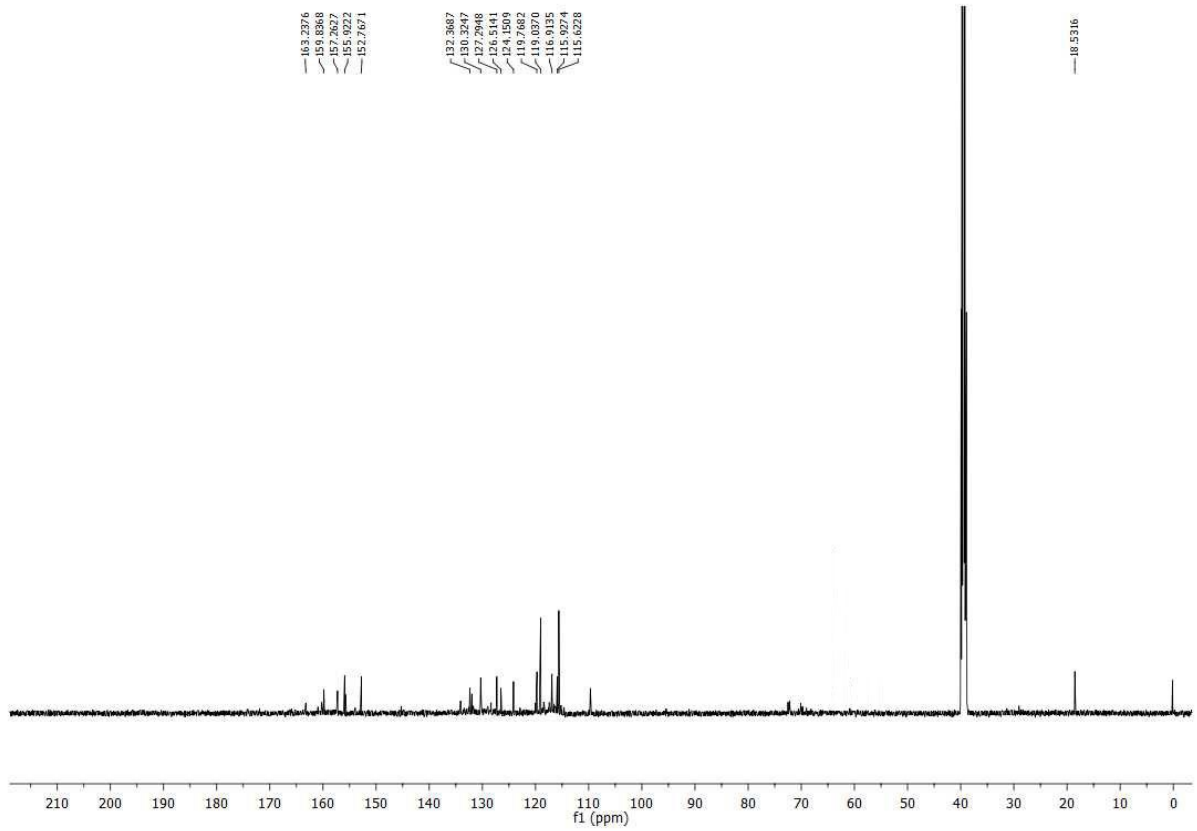

SAIF\_PANJAB UNIVERSITY, CHANDIGARH

SYNAPT-XS#DBA064

28-Apr-2023

AMANDEEP\_ATPC 5 (0.110) Cm (4.7)

12:29:56

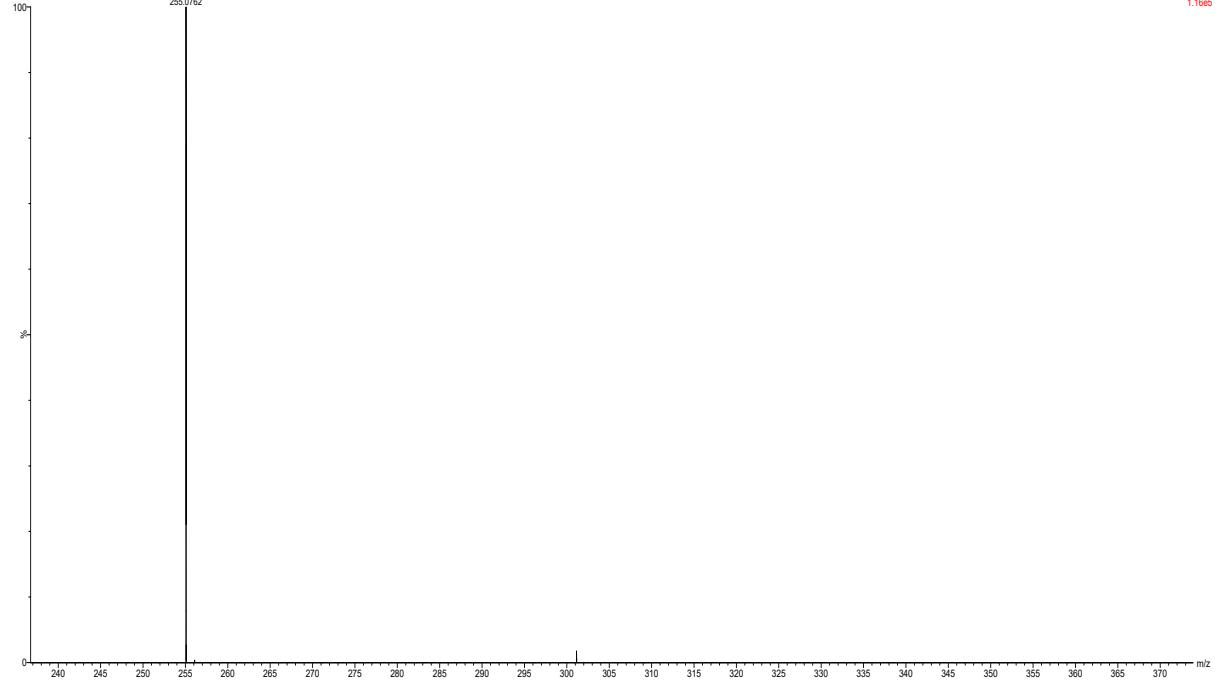

1: TOF MS ES+

1.16e5



| Time | Height | Area     | Area% |
|------|--------|----------|-------|
| 0.11 | 881936 | 26065.85 | 99.80 |
| 0.61 | 2764   | 51.09    | 0.20  |

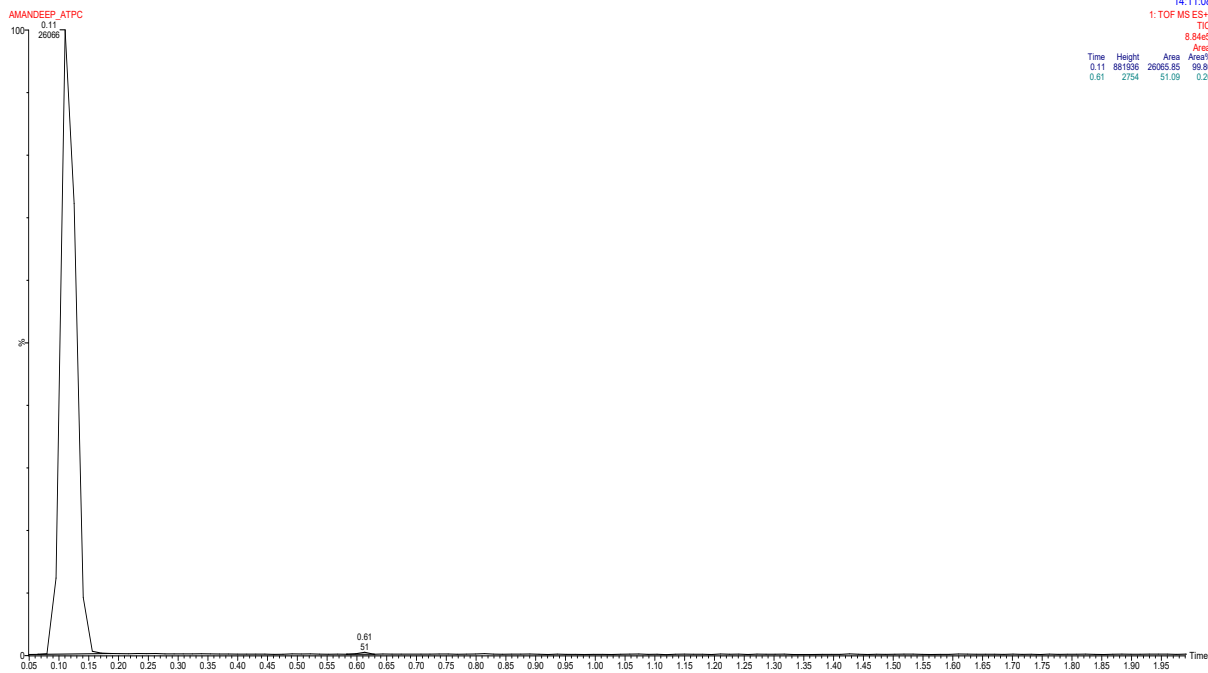

Figure S5. IR,  $^1\text{H-NMR}$ ,  $^{13}\text{C-NMR}$ , and HRMS spectra of Compound 6.

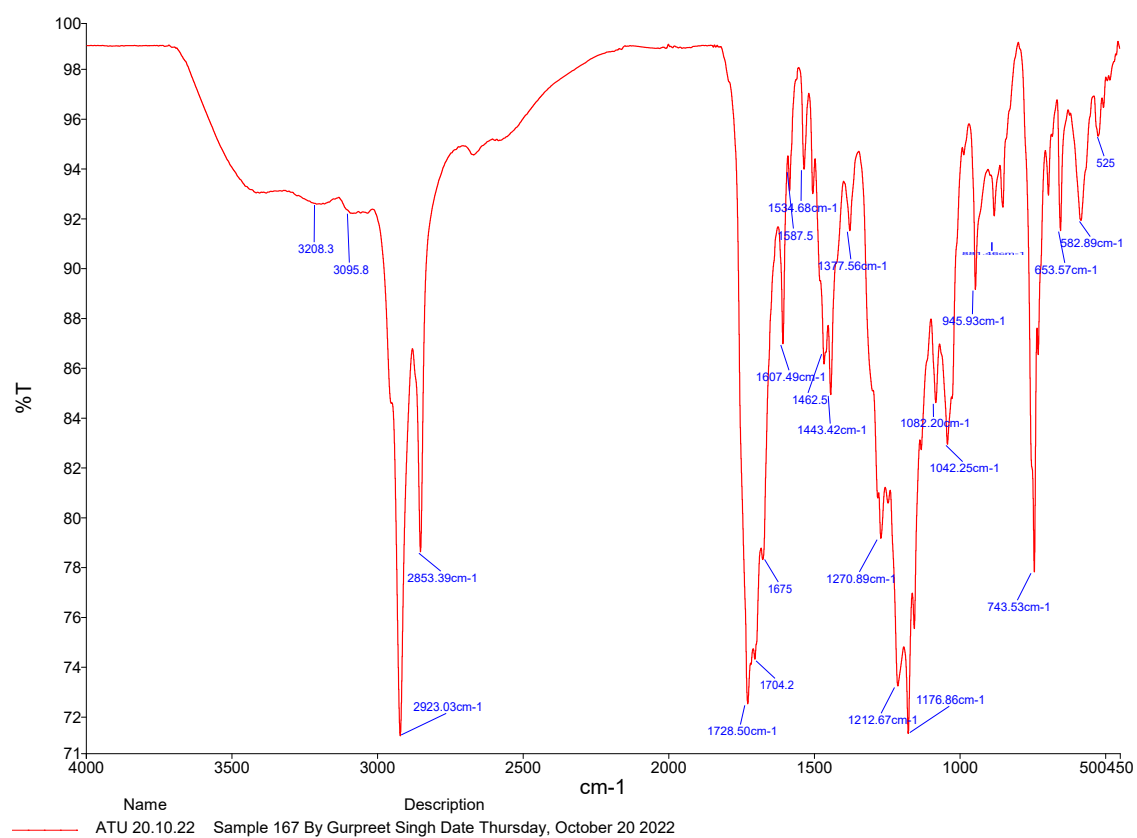

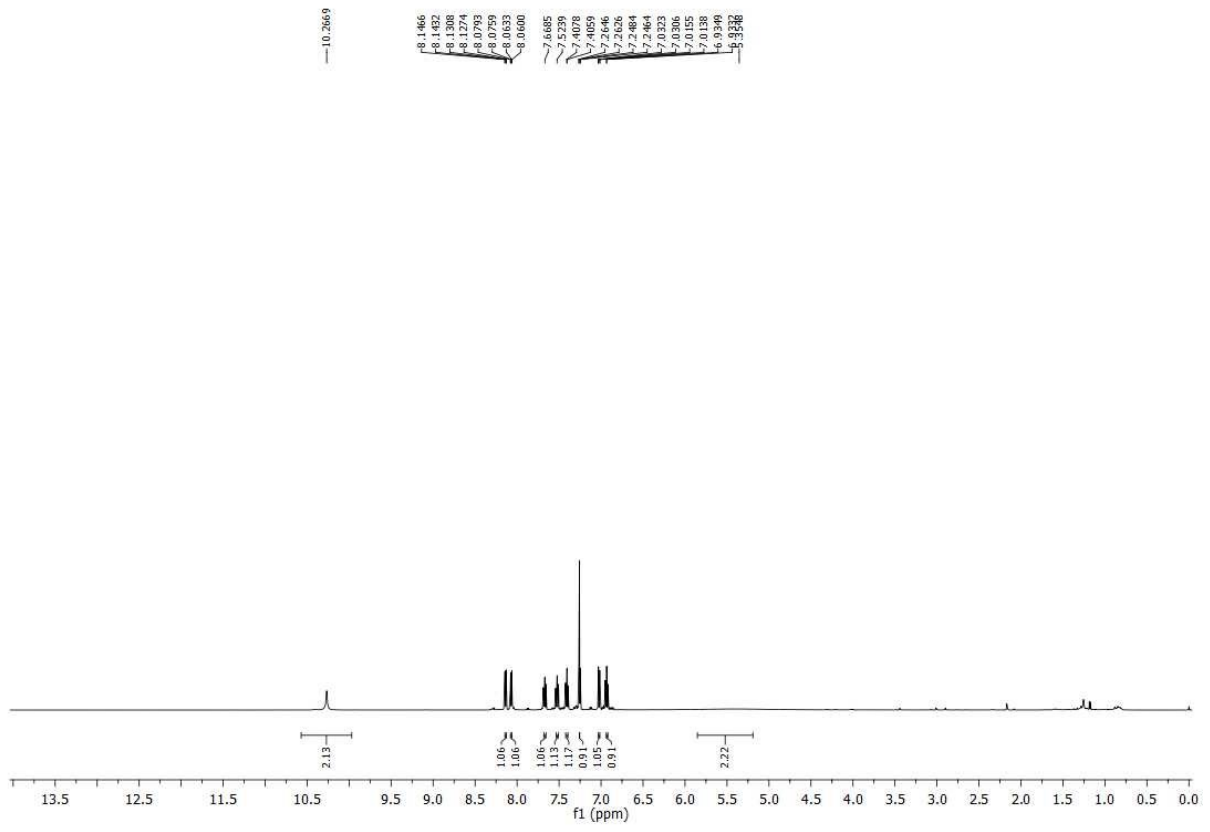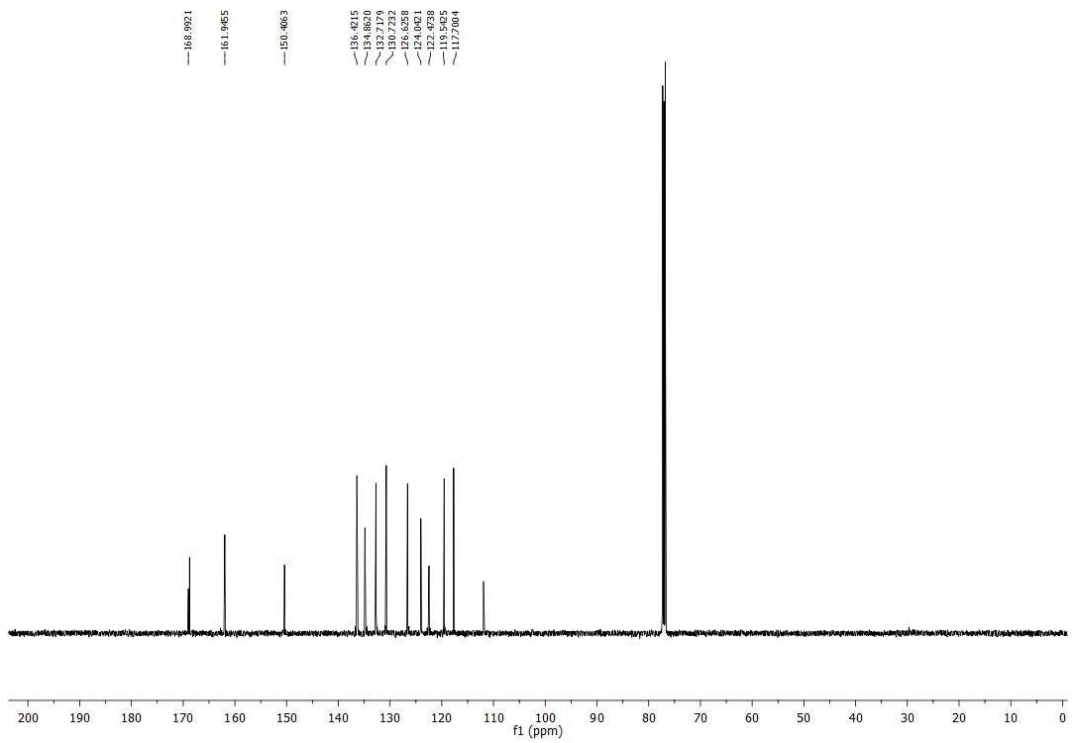

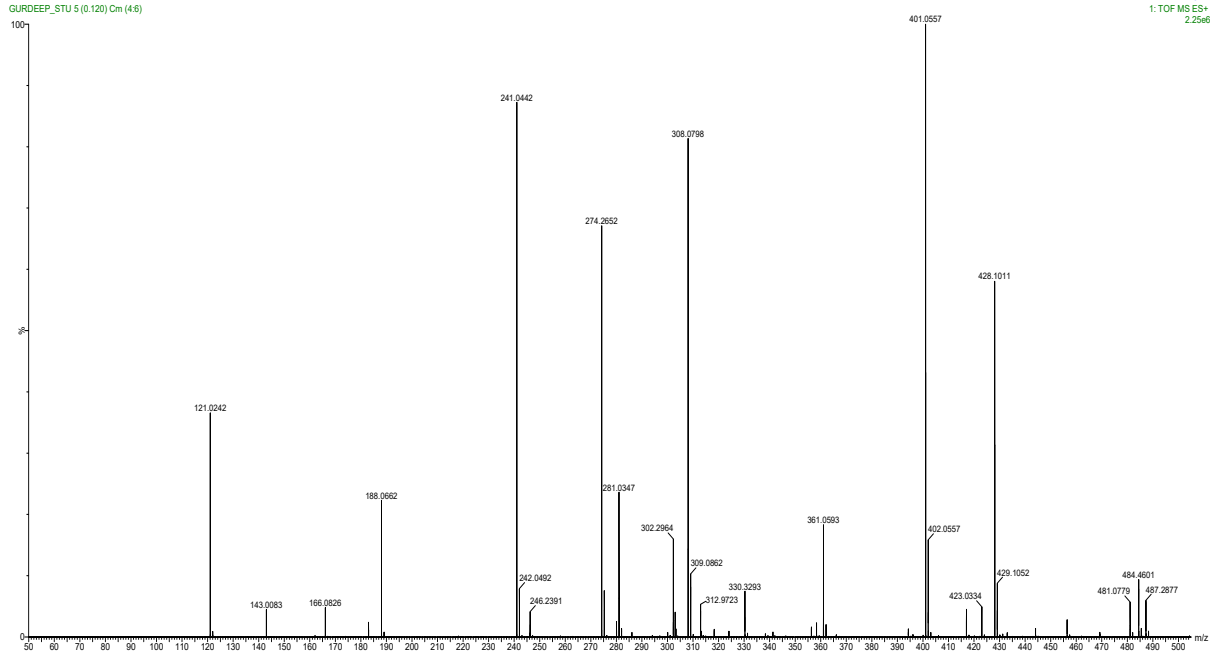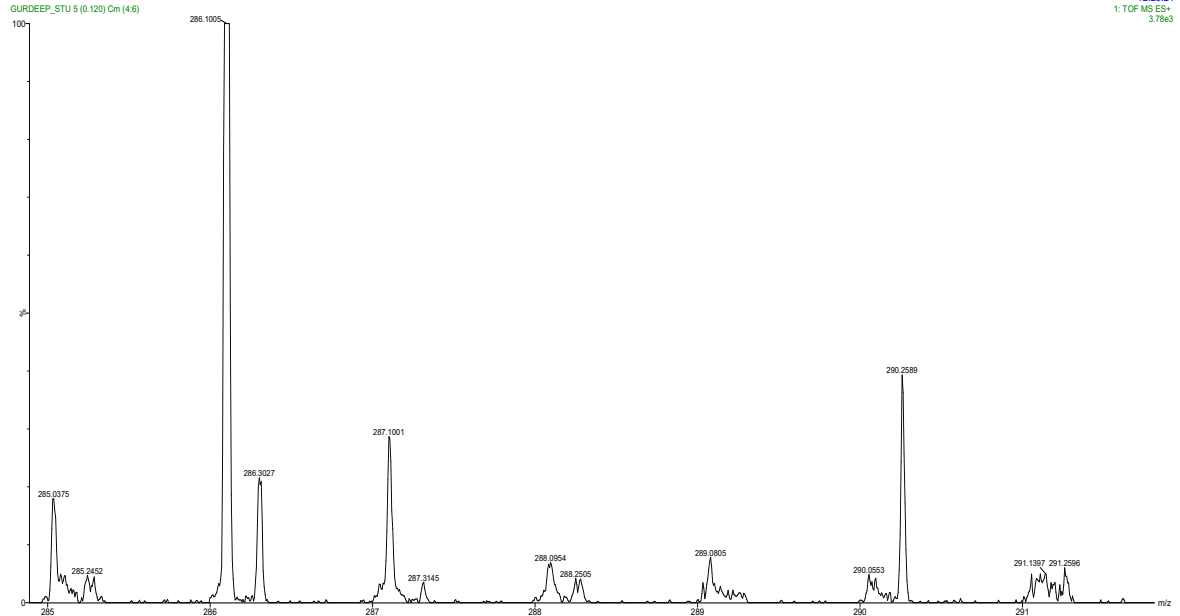

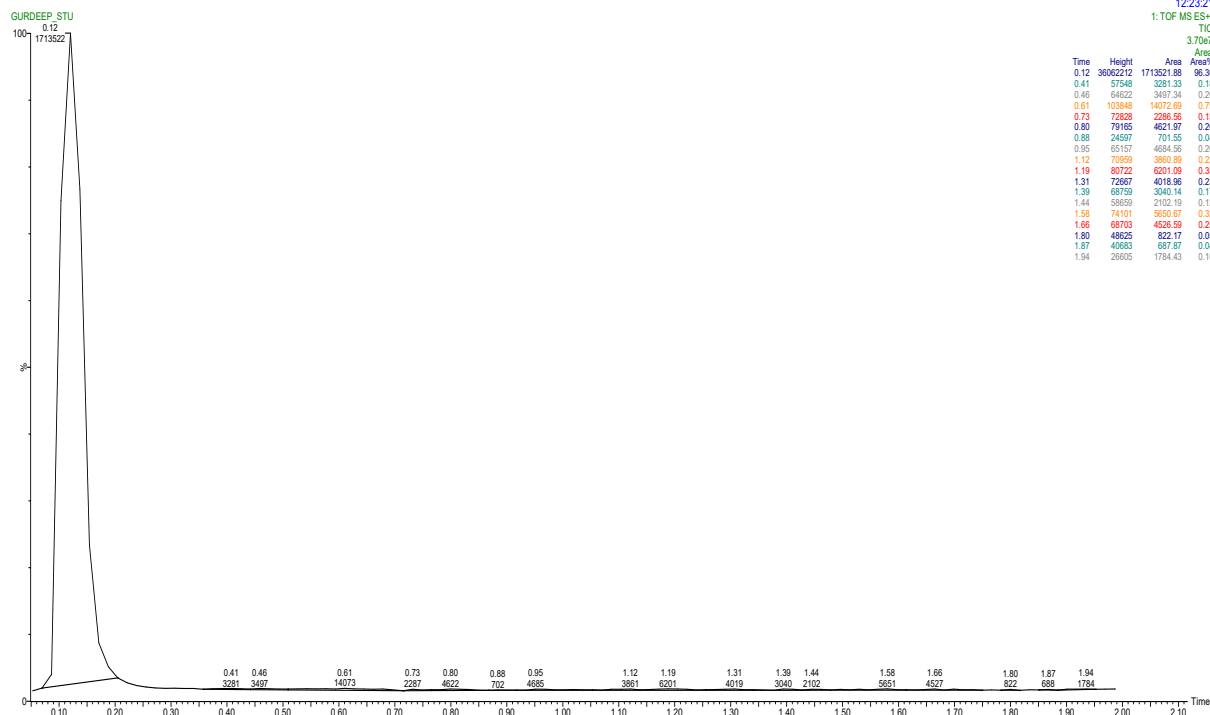

Figure S6. IR, <sup>1</sup>H-NMR, <sup>13</sup>C-NMR, and HRMS spectra of Compound 7.

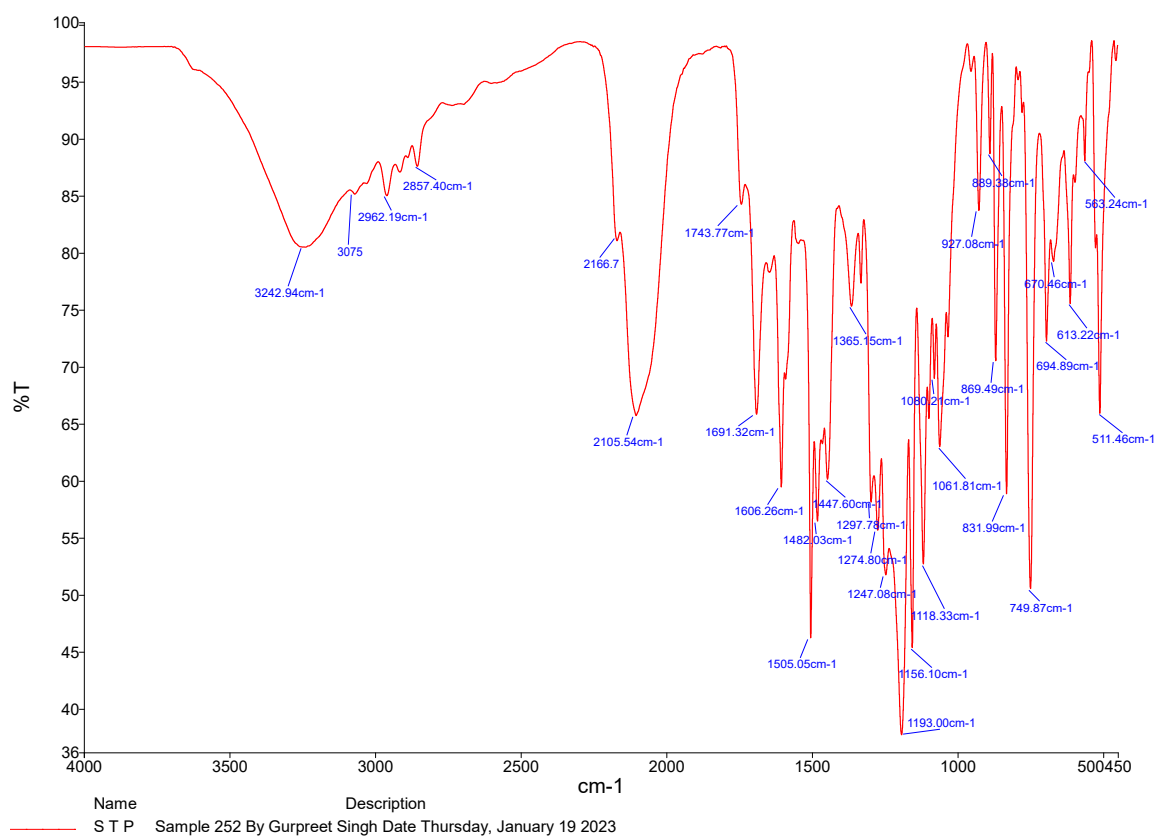

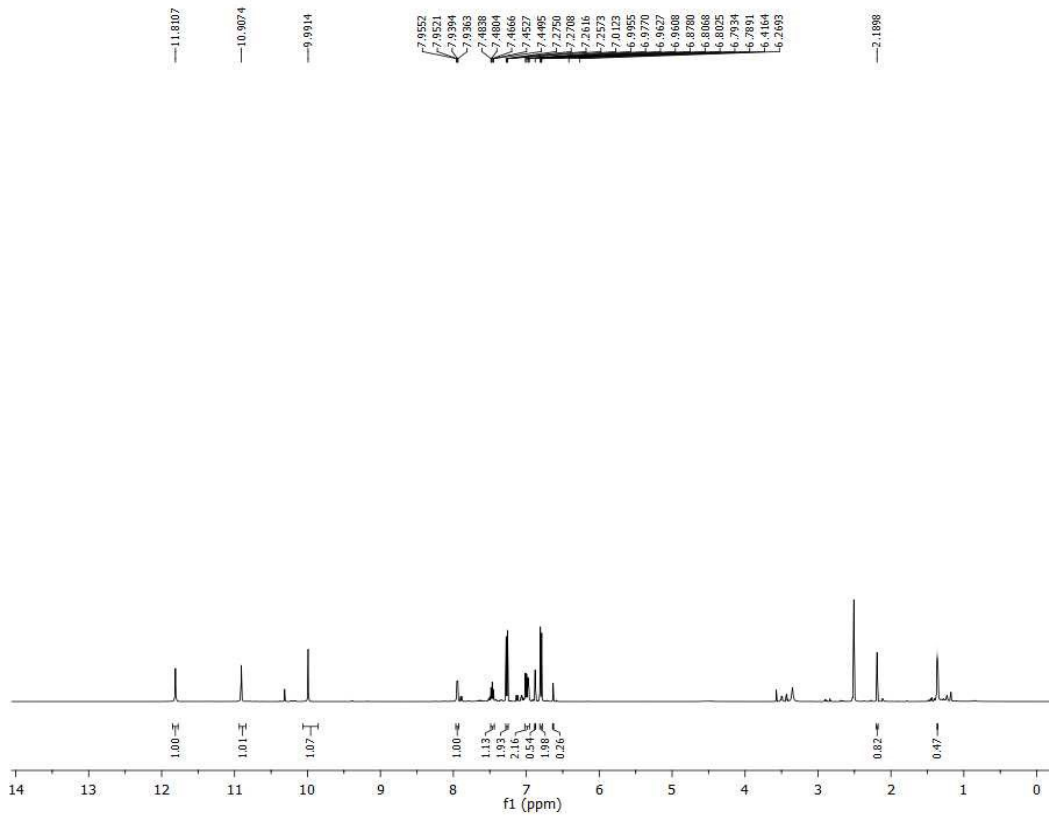

AMANDEEP STP 5 (0.121) Cm (4.8)

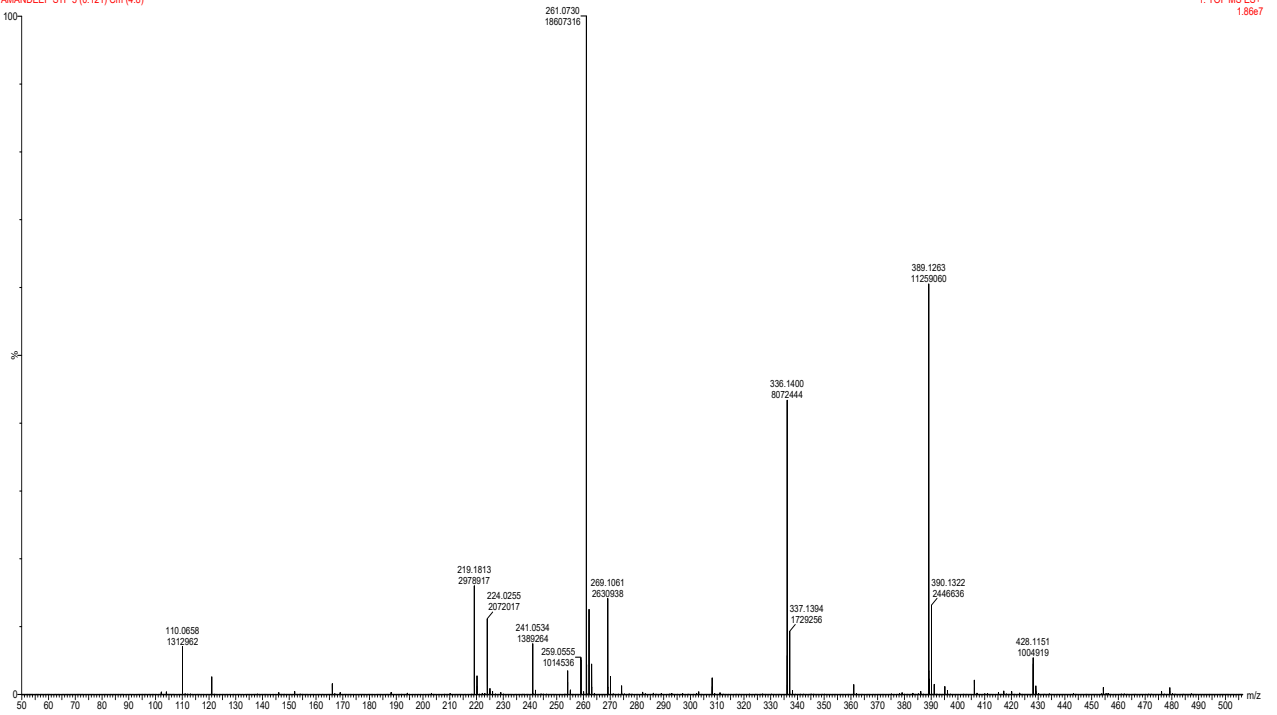

AMANDEEP STP 5 (0.121) Cm (4.8)

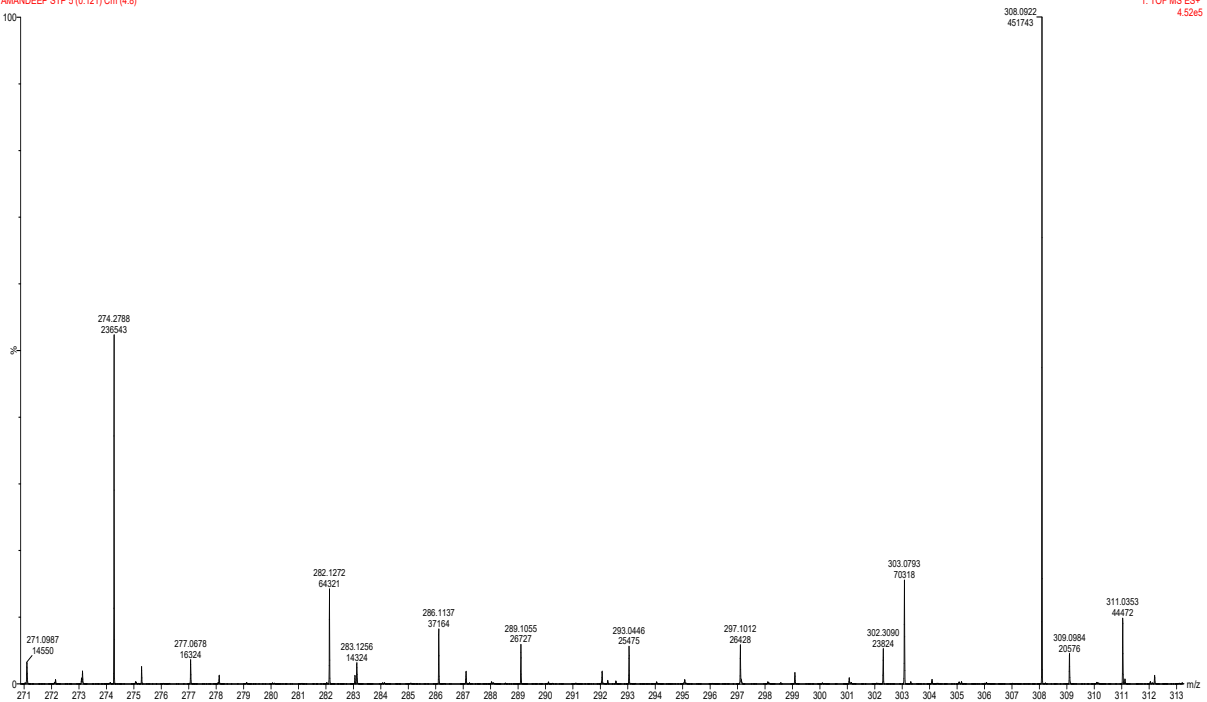

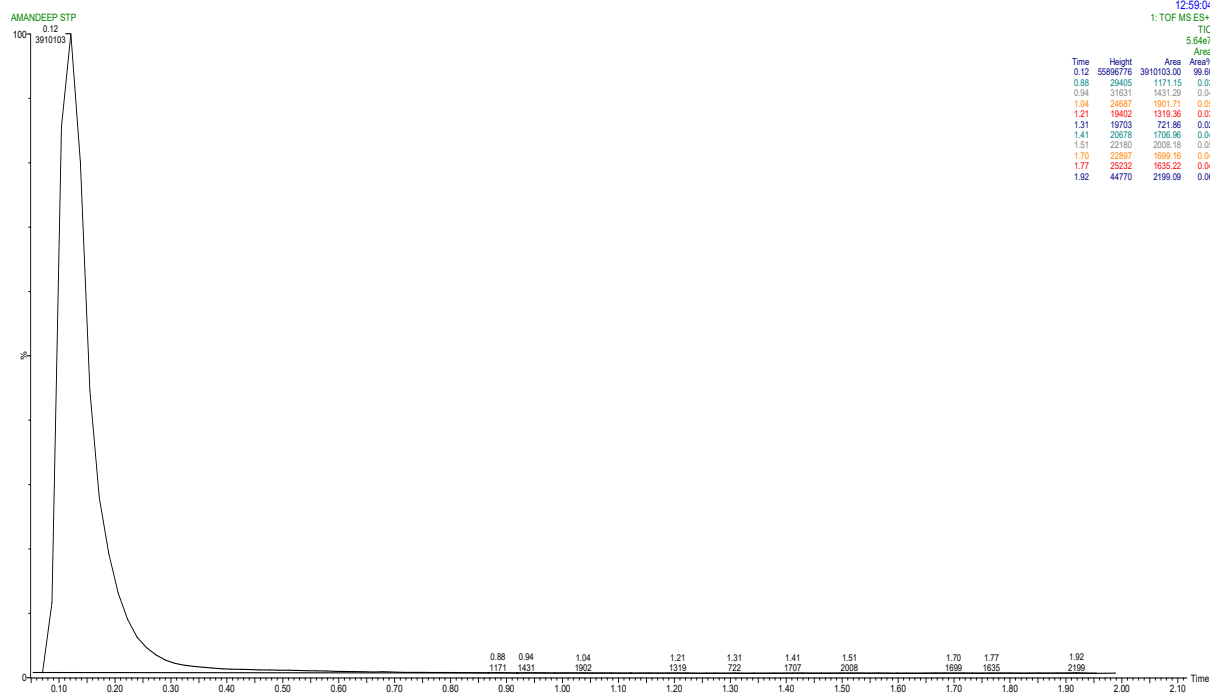

Figure S7. IR,  $^1\text{H-NMR}$ ,  $^{13}\text{C-NMR}$ , and HRMS spectra of Compound 8

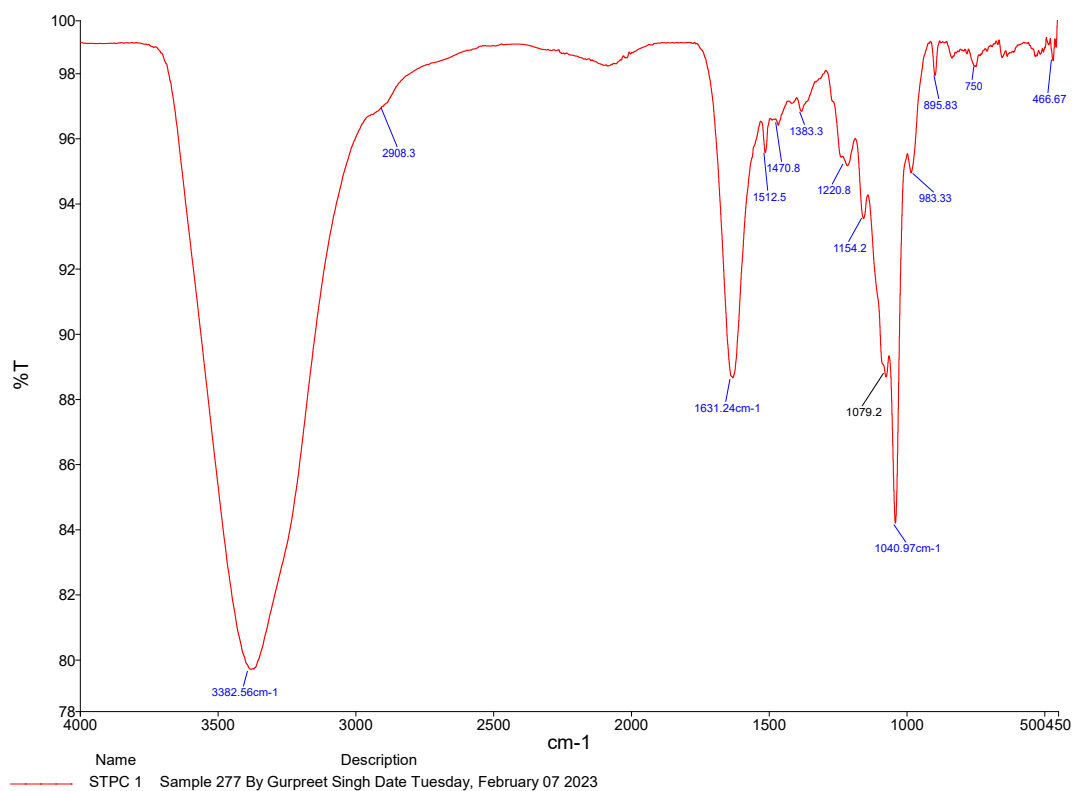

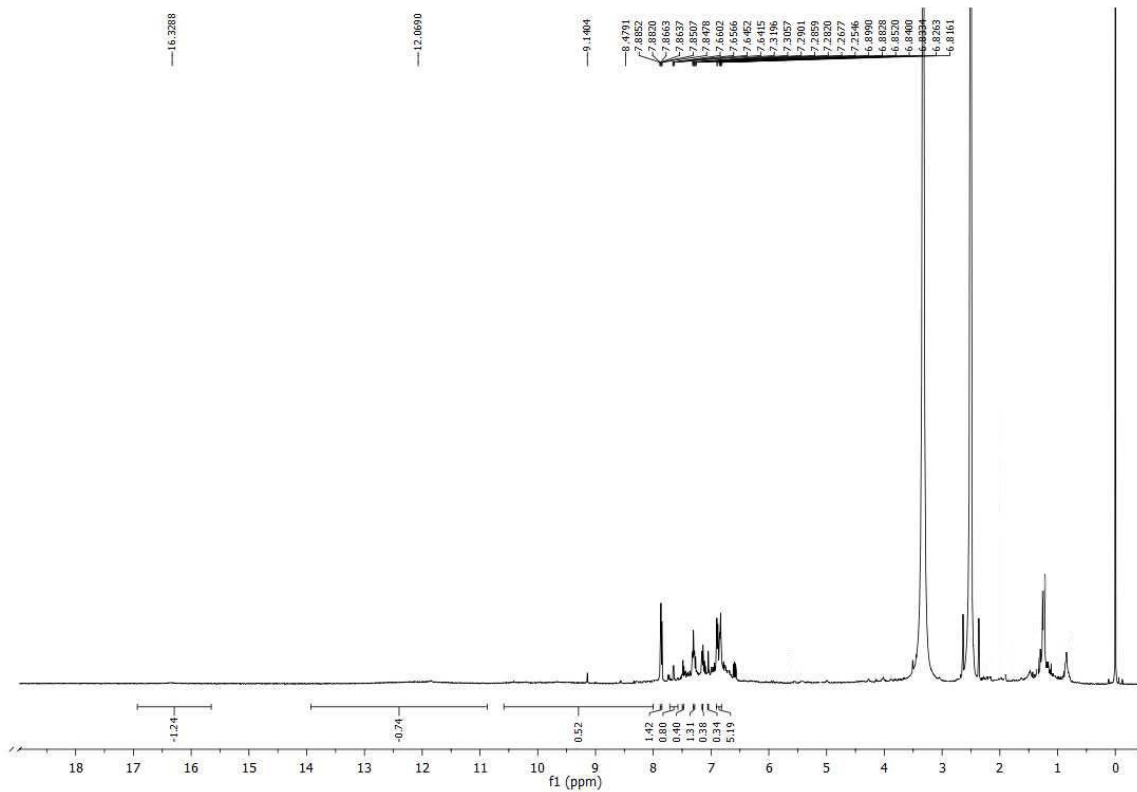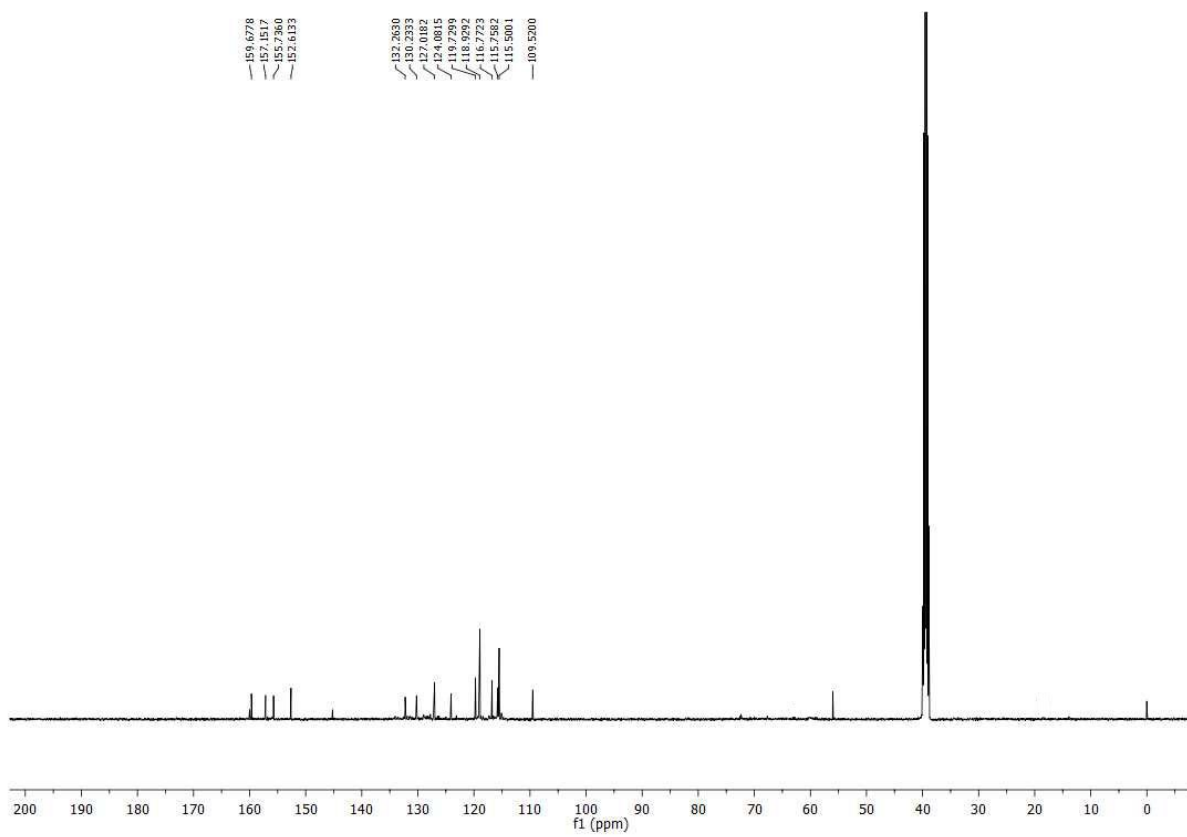



AMANDEEP\_STPC 5 (0.120) Cm (5.12)

1. TOF MS ES+

4.89e6

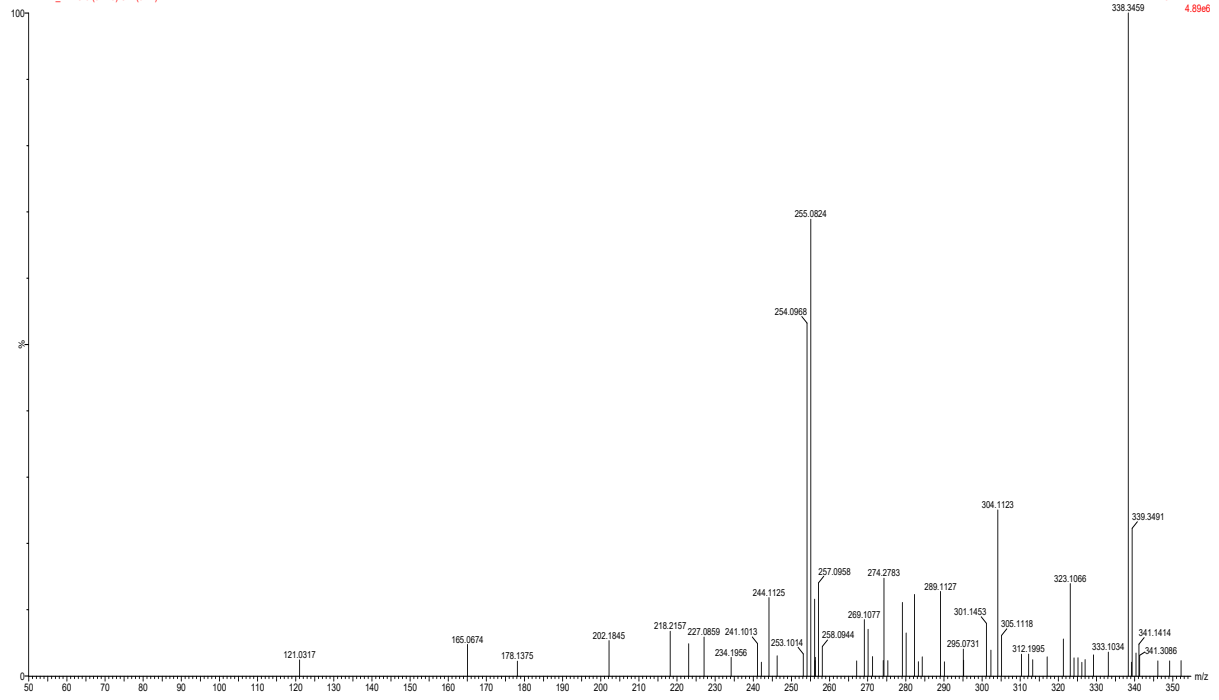

AMANDEEP\_STPC 5 (0.120) Cm (5.12)

1. TOF MS ES+

6.23e5

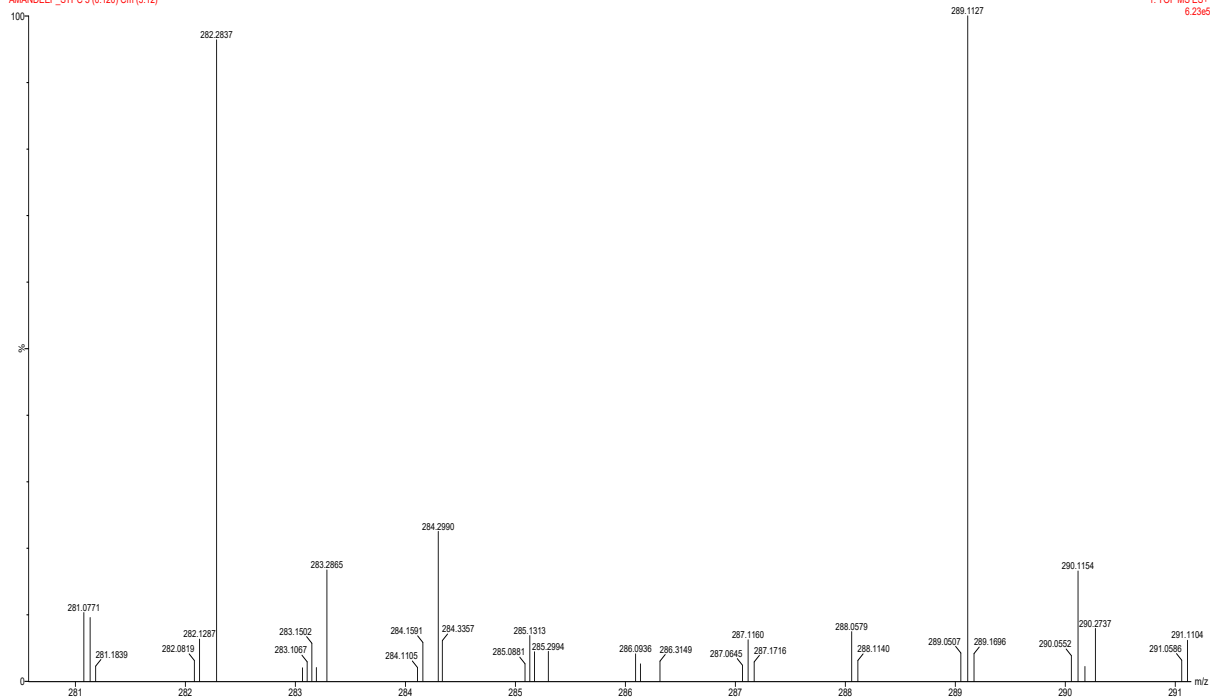

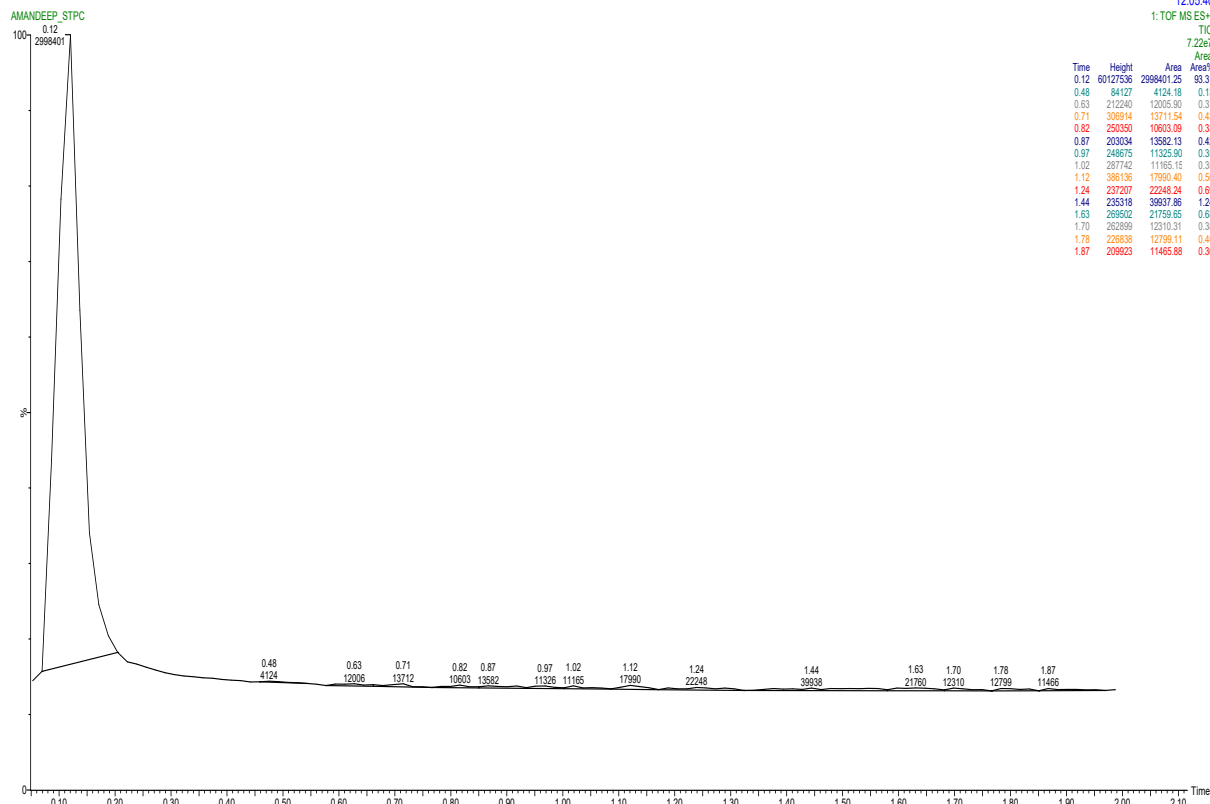

Figure S8. IR,  $^1\text{H-NMR}$ ,  $^{13}\text{C-NMR}$  and HRMS spectra of Compound 11.

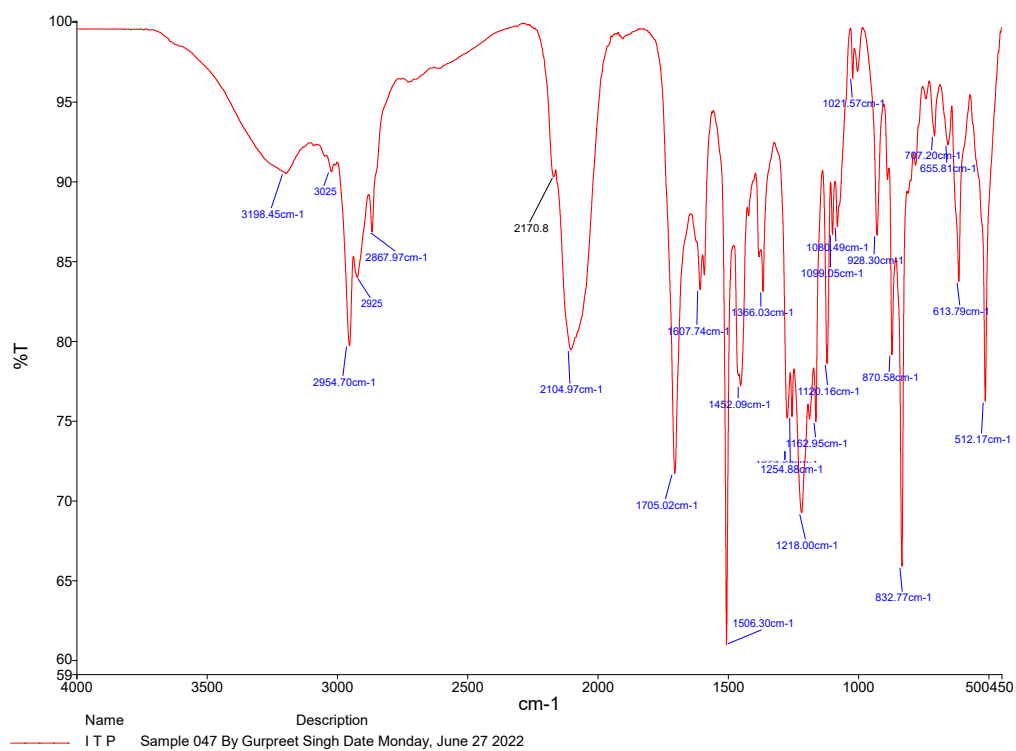

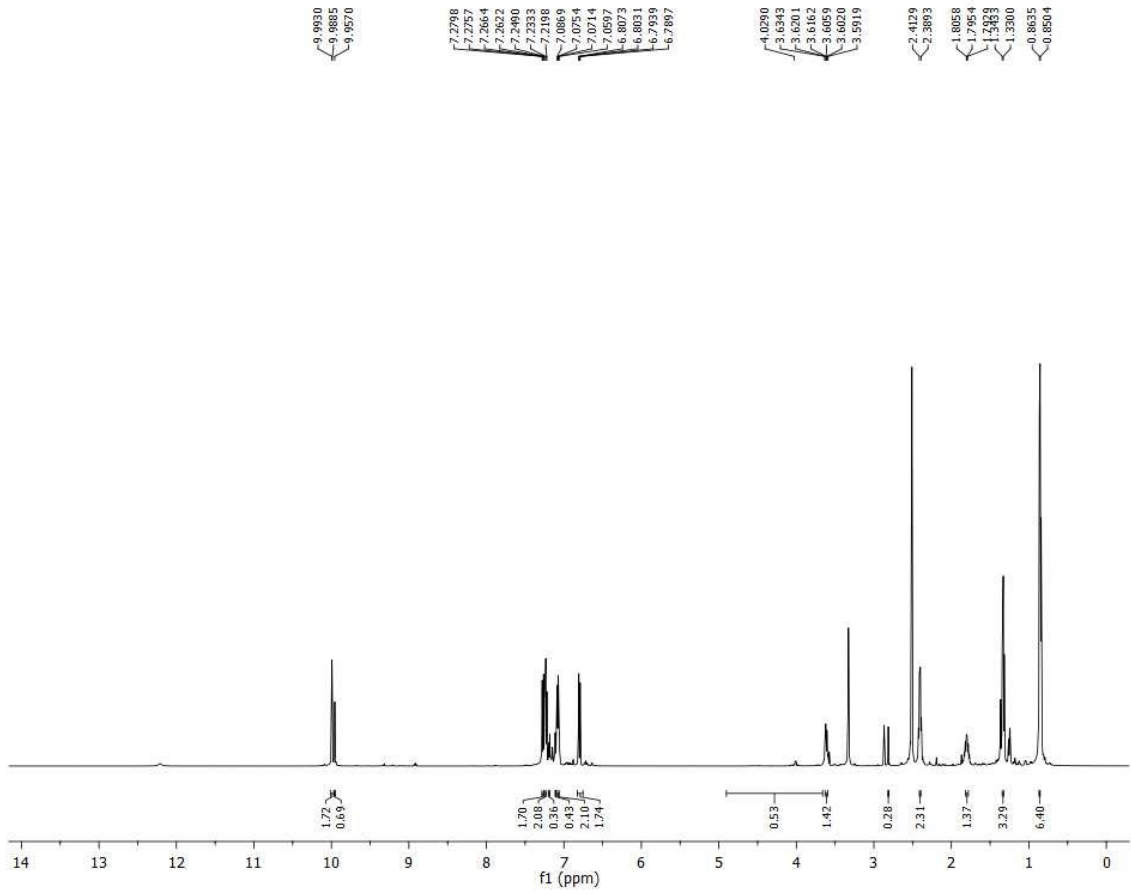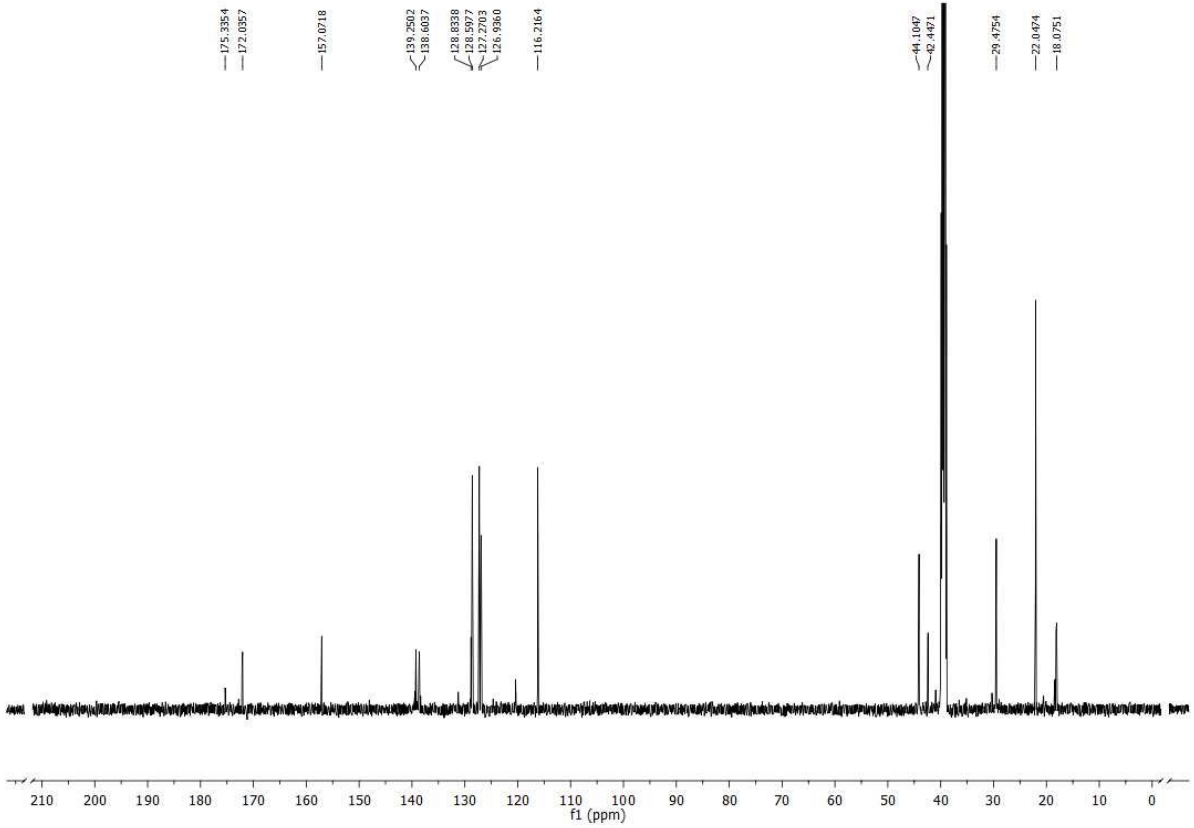

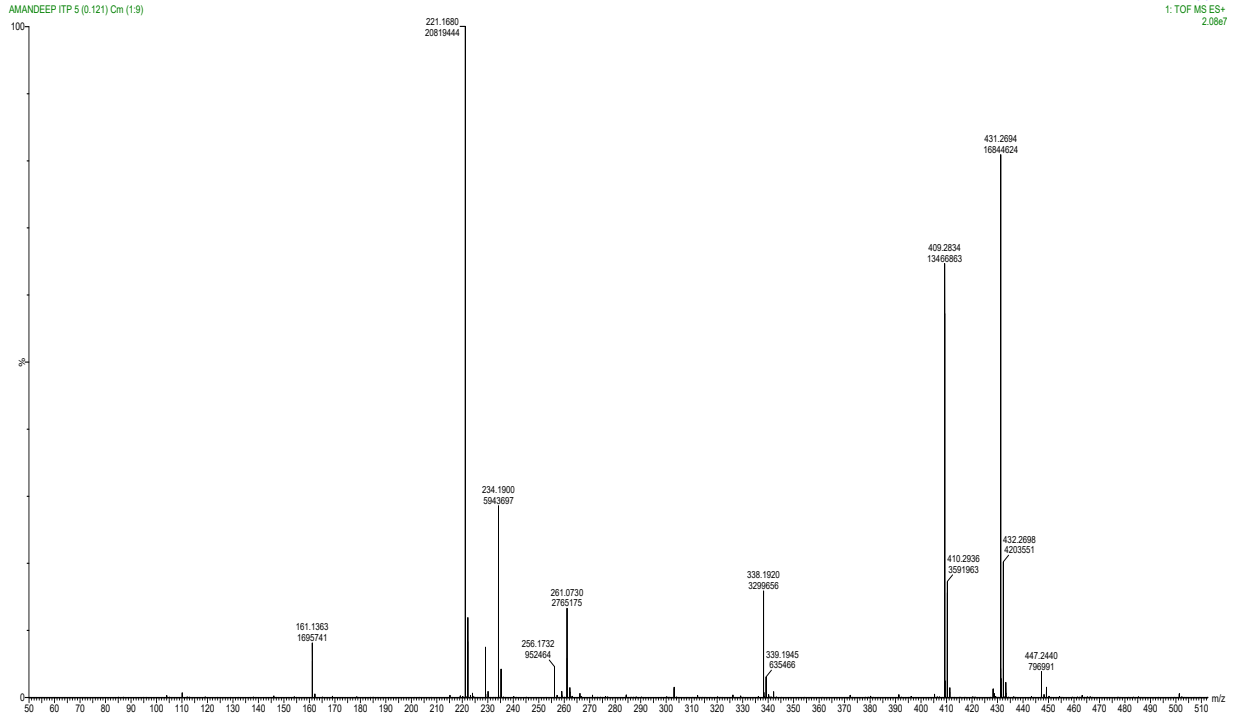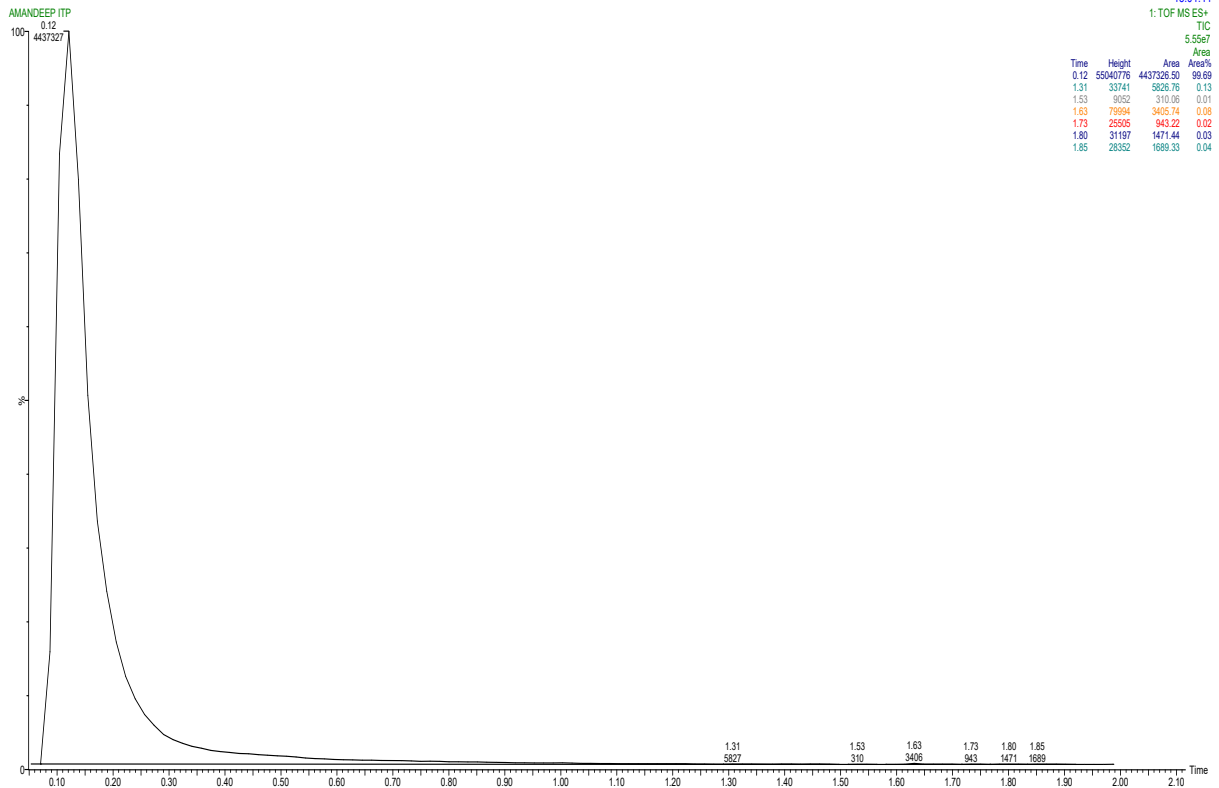

Figure S9. IR, <sup>1</sup>H-NMR, <sup>13</sup>C-NMR and HRMS spectra of Compound 12

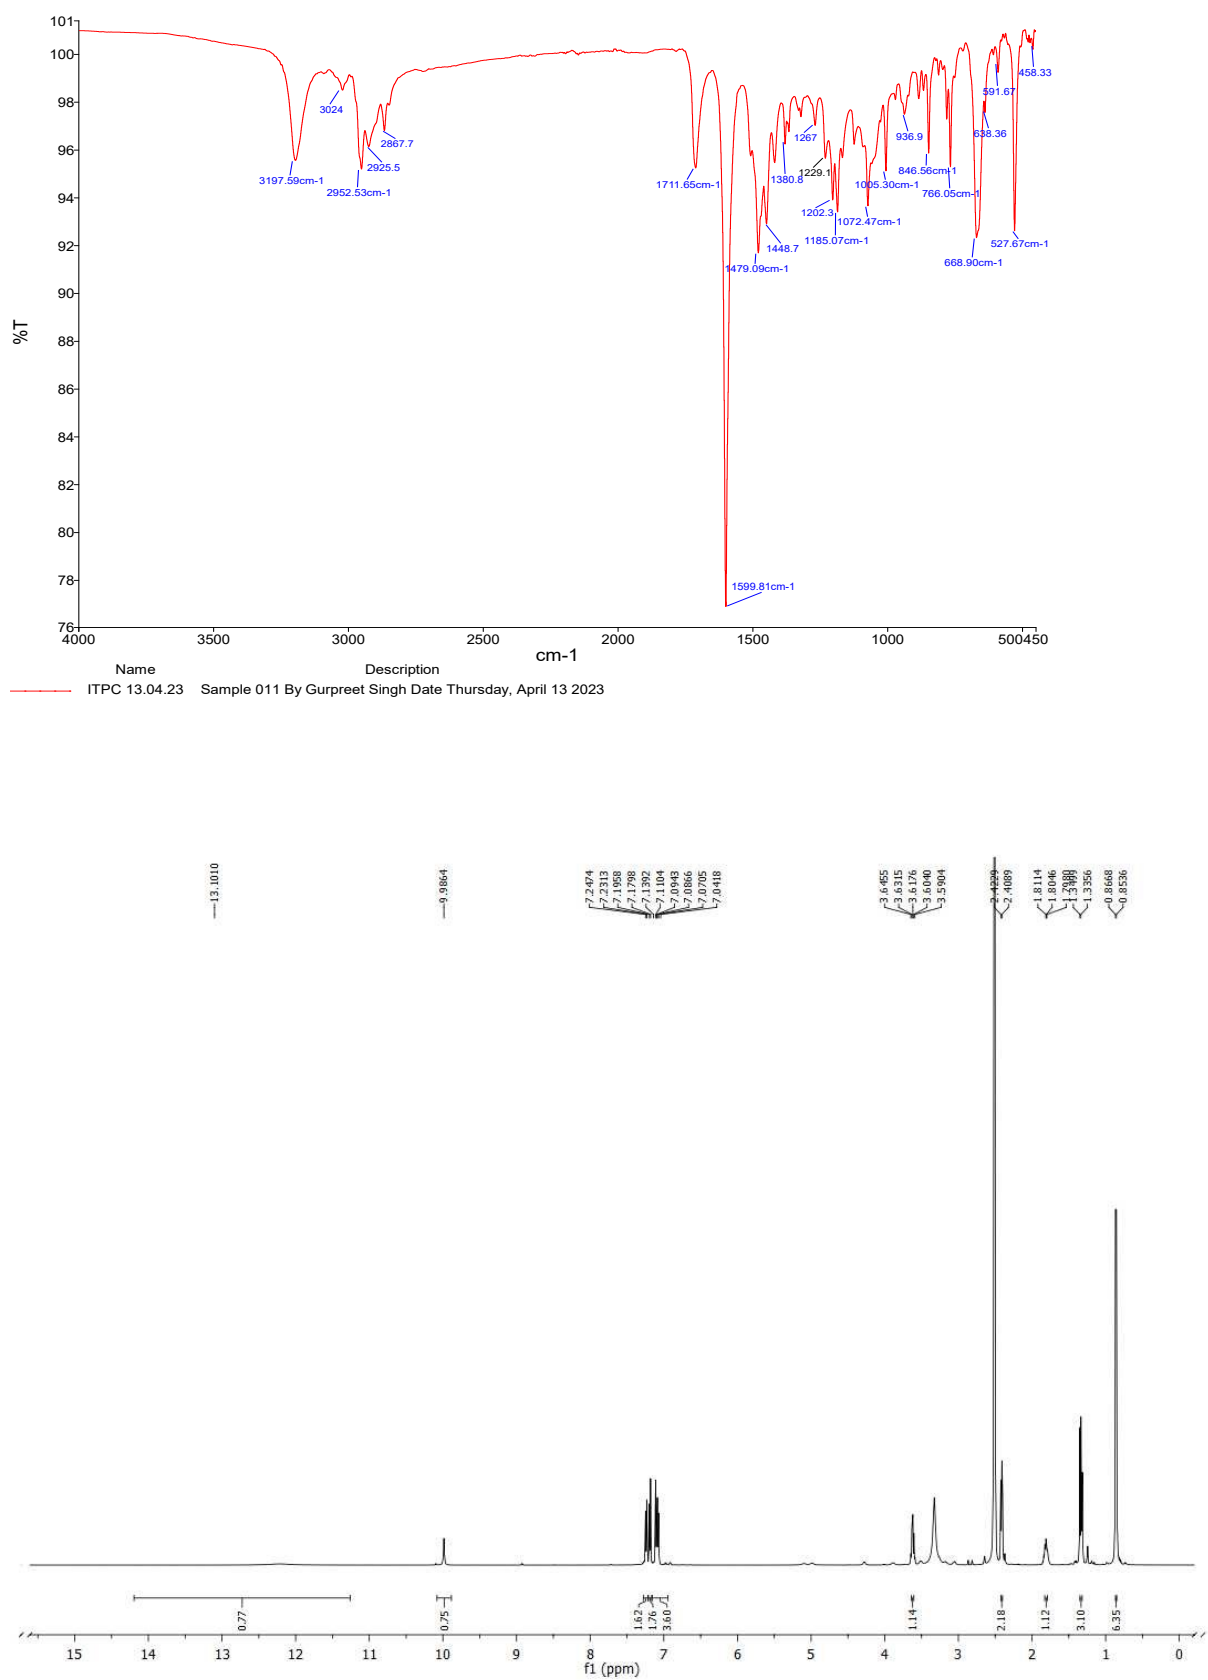

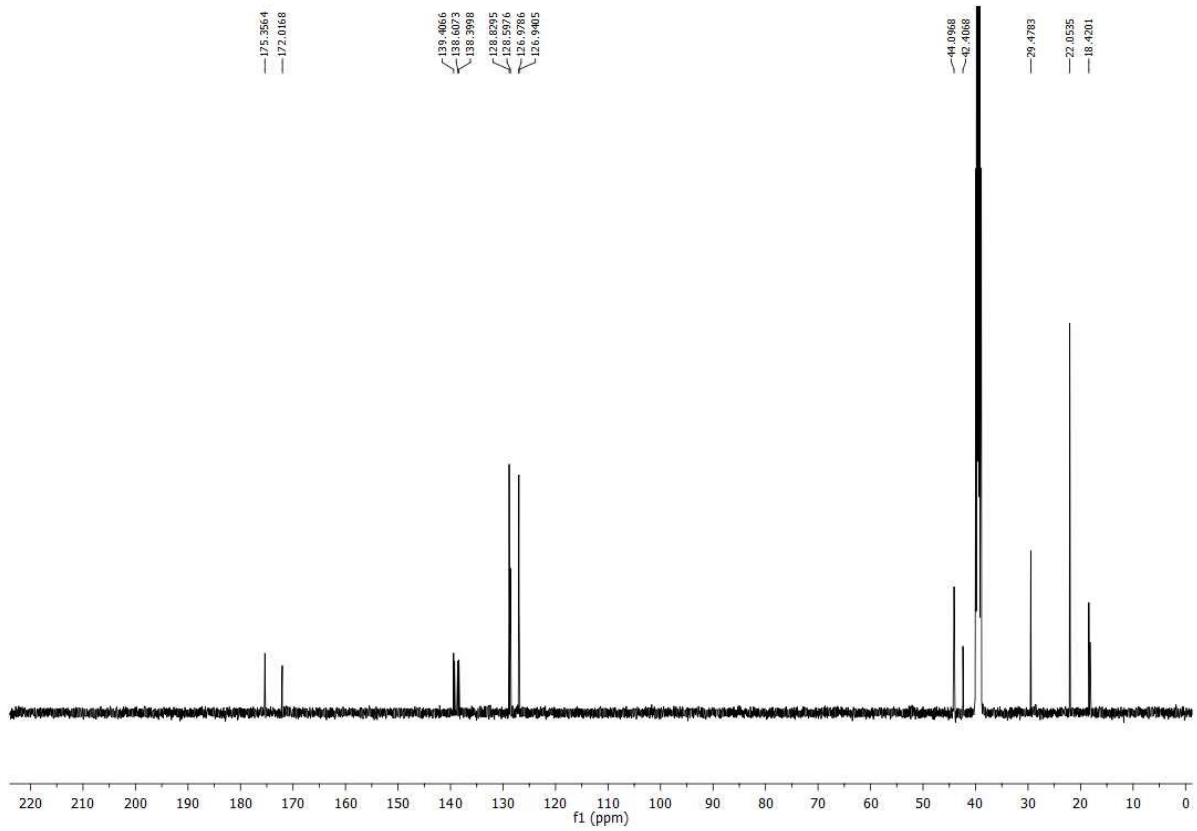

SAIF\_PANJAB UNIVERSITY CHANDIGARH

SYNAPT-XS#DBA004

04-Aug-2022

AMANDEEP\_ITPC 5 (0.121) Cm (4.8)

12:13:41

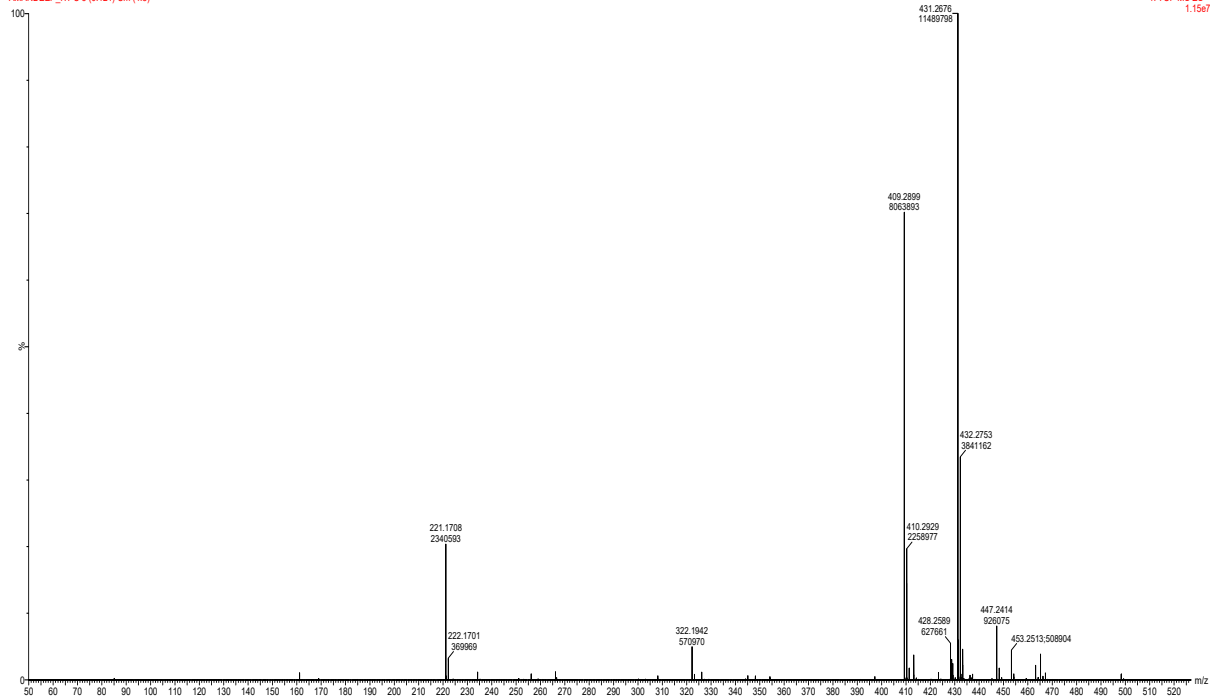

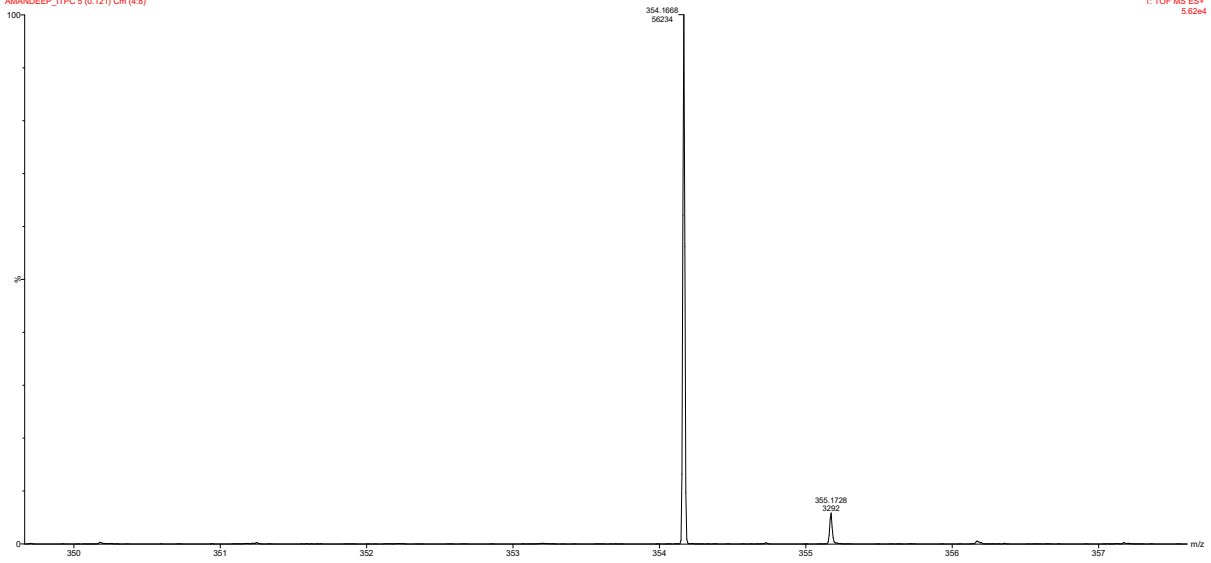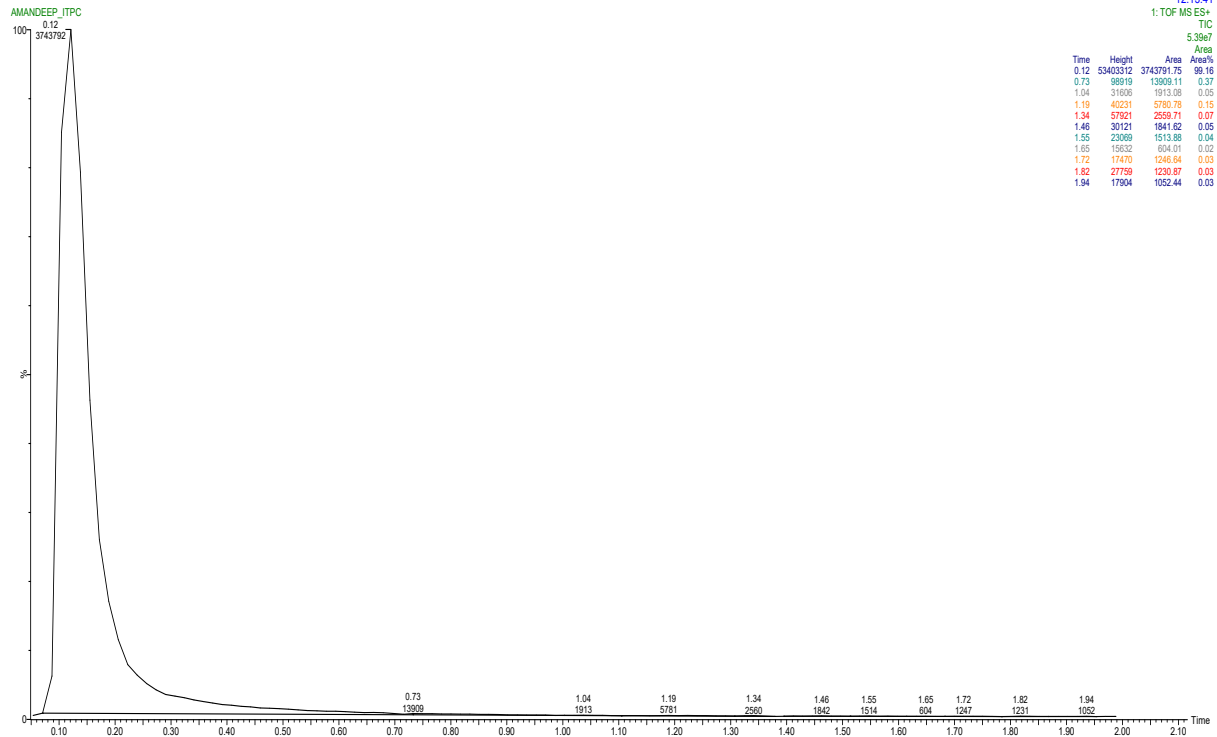

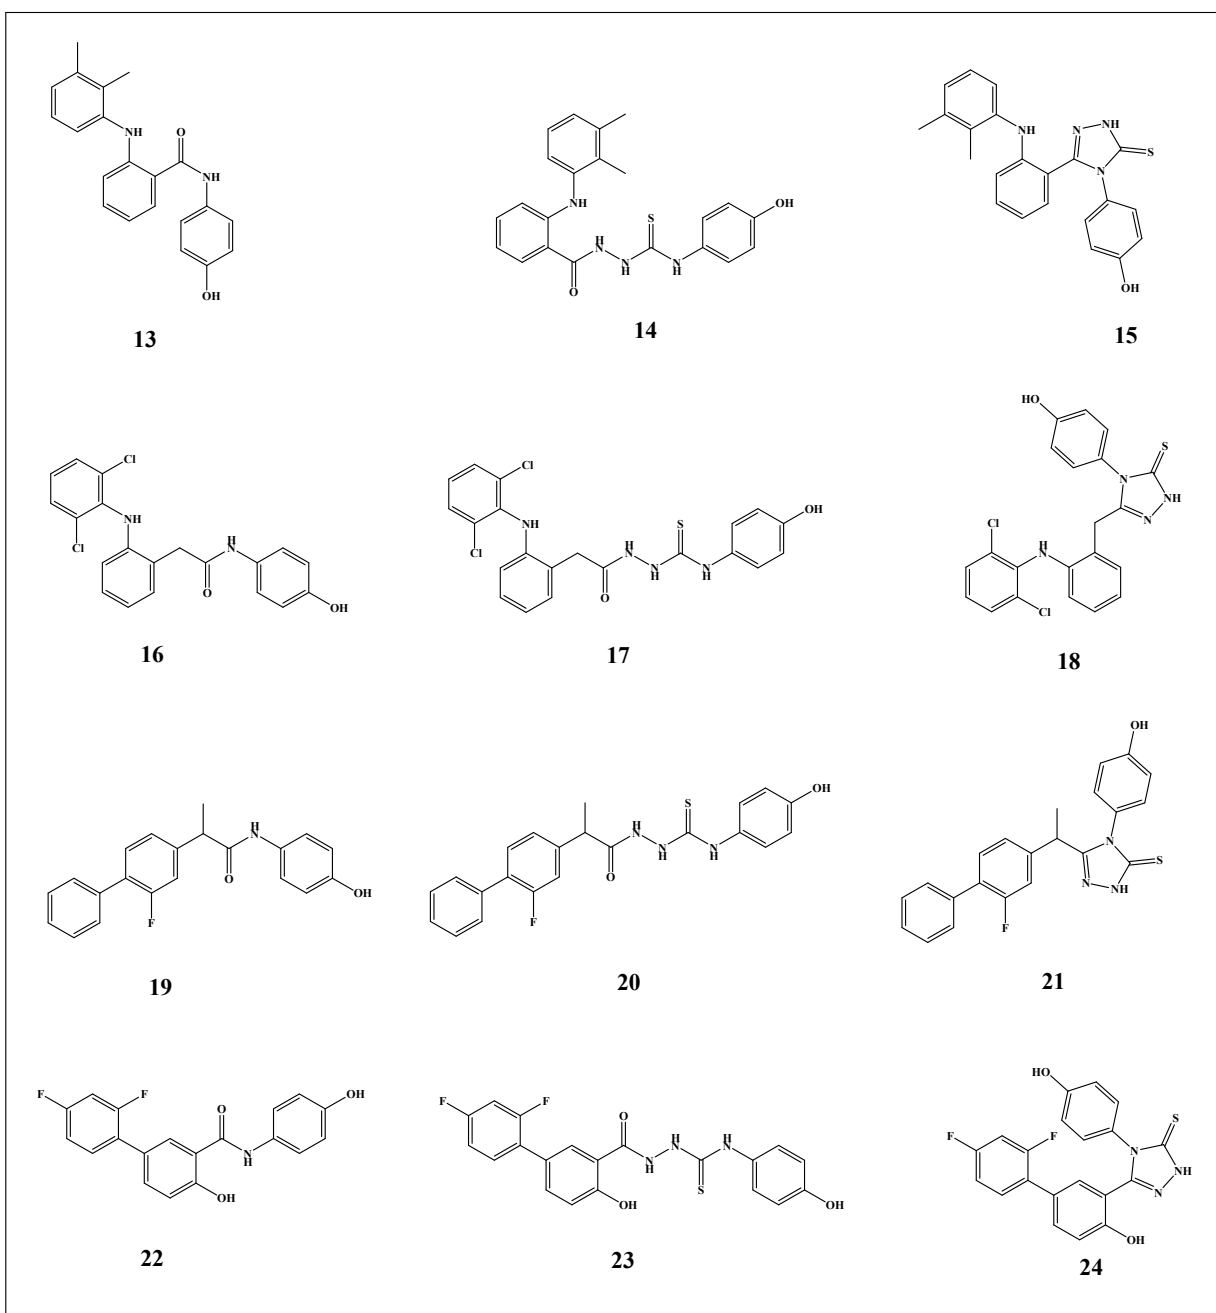

**Figure S10.** List of compounds with inappropriate ADMET profile.



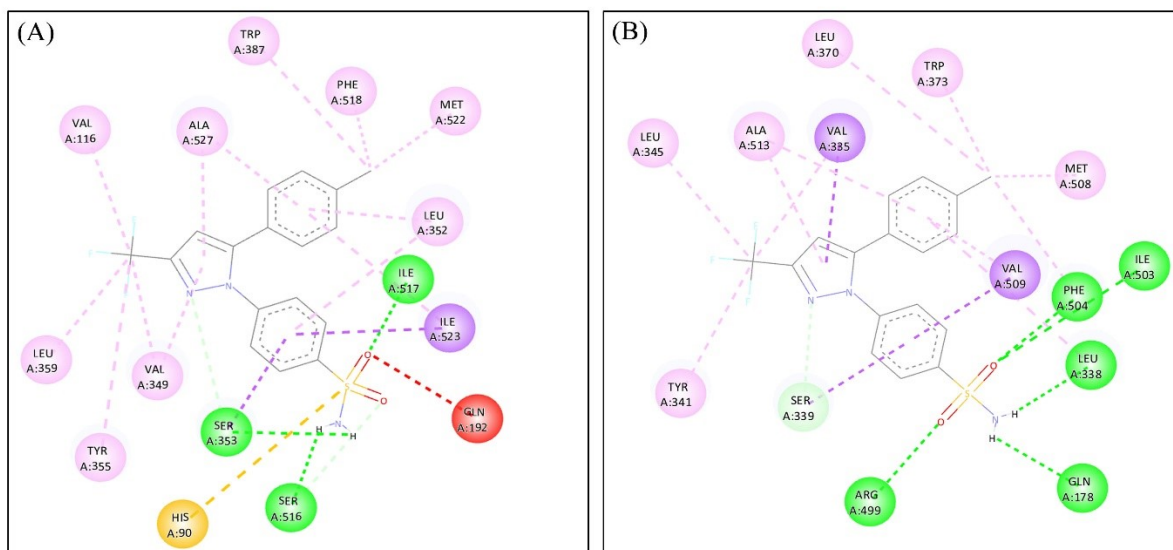

**Figure S11.** 2D diagram showing the redocked poses of celecoxib in the binding pocket of COX-1 and COX-2.

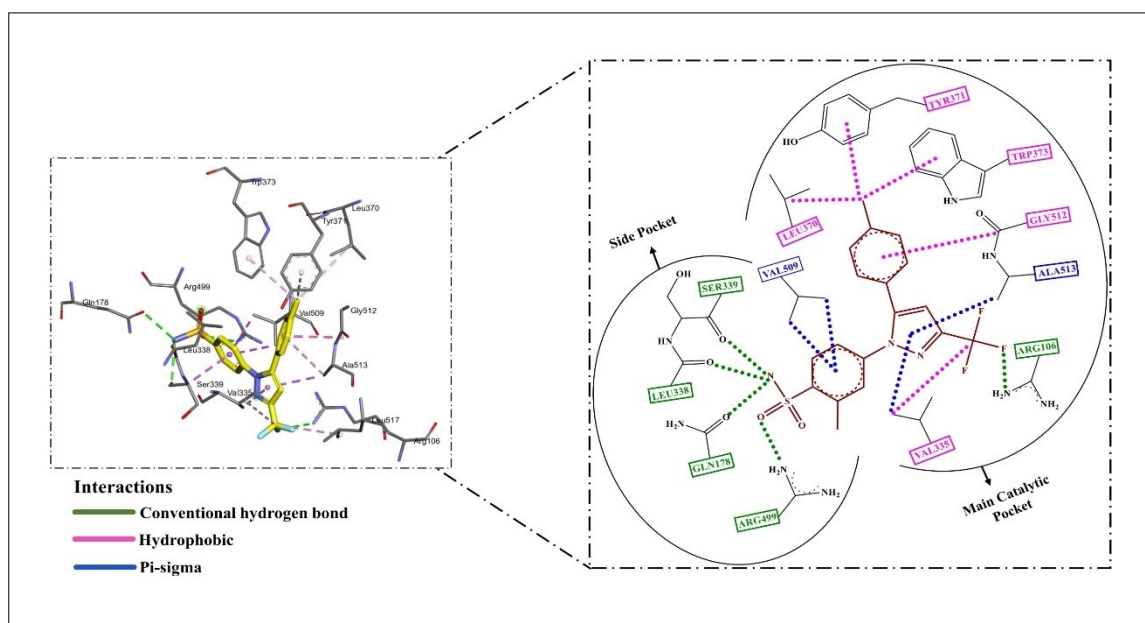

**Figure S12.** Orientation of celecoxib within the side pocket and main catalytic pocket of COX-2

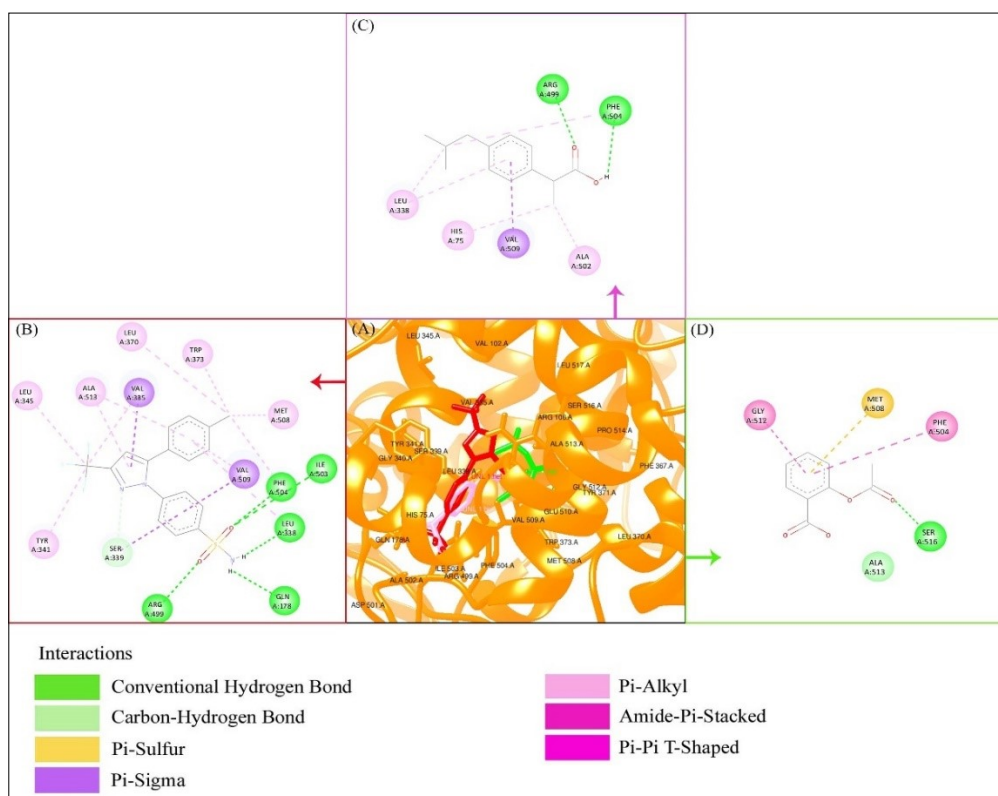

**Figure S13.** (A) 3D diagram showing penetration of celecoxib (red), aspirin (green) and ibuprofen (pink) in the side pocket of COX-2. 2D representations of predicted binding modes of celecoxib (B), ibuprofen (C) and aspirin (D).

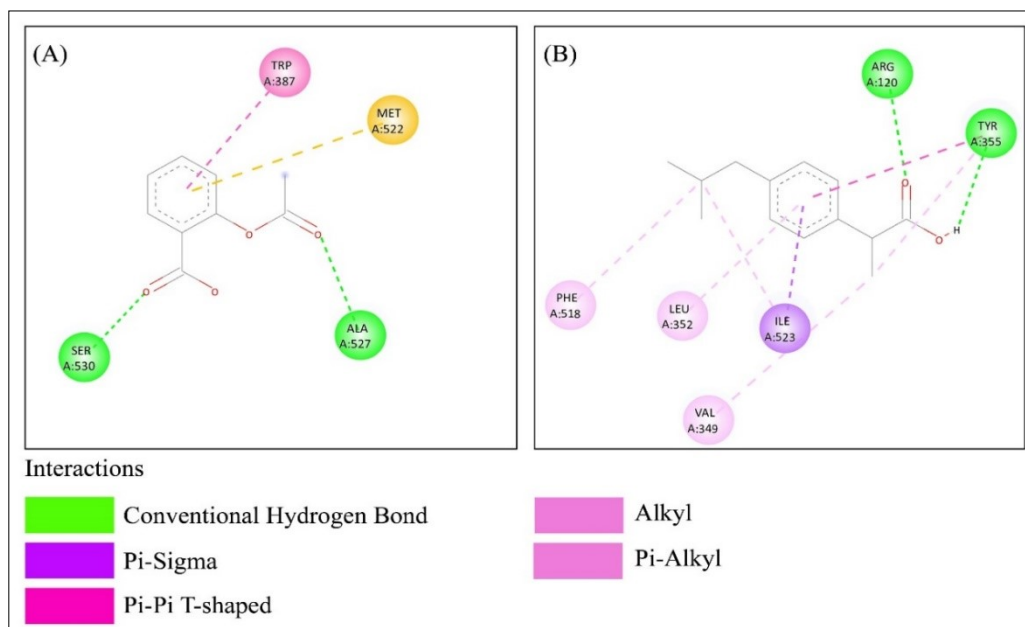

**Figure S14.** 2D interaction diagrams of aspirin and ibuprofen with the key residues of COX-1 binding pocket.

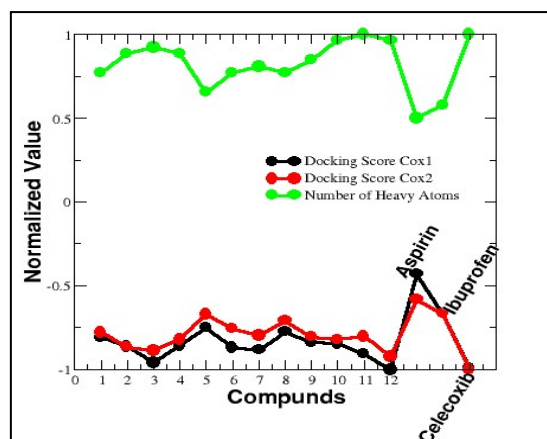

**Figure S15.** Correlation of Normalized Docking Score and number of heavy atoms

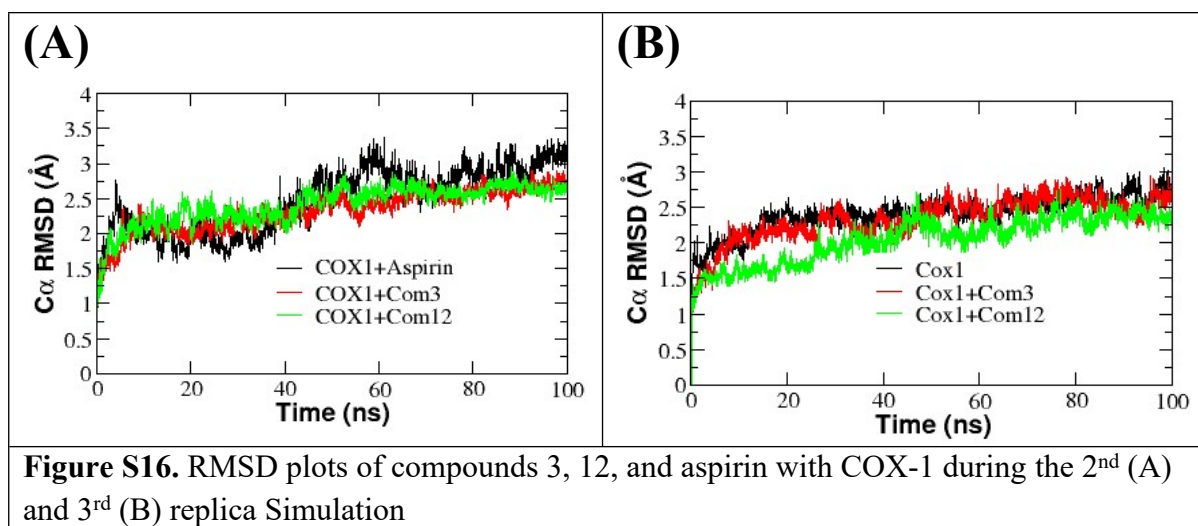

**Figure S16.** RMSD plots of compounds 3, 12, and aspirin with COX-1 during the 2<sup>nd</sup> (A) and 3<sup>rd</sup> (B) replica Simulation

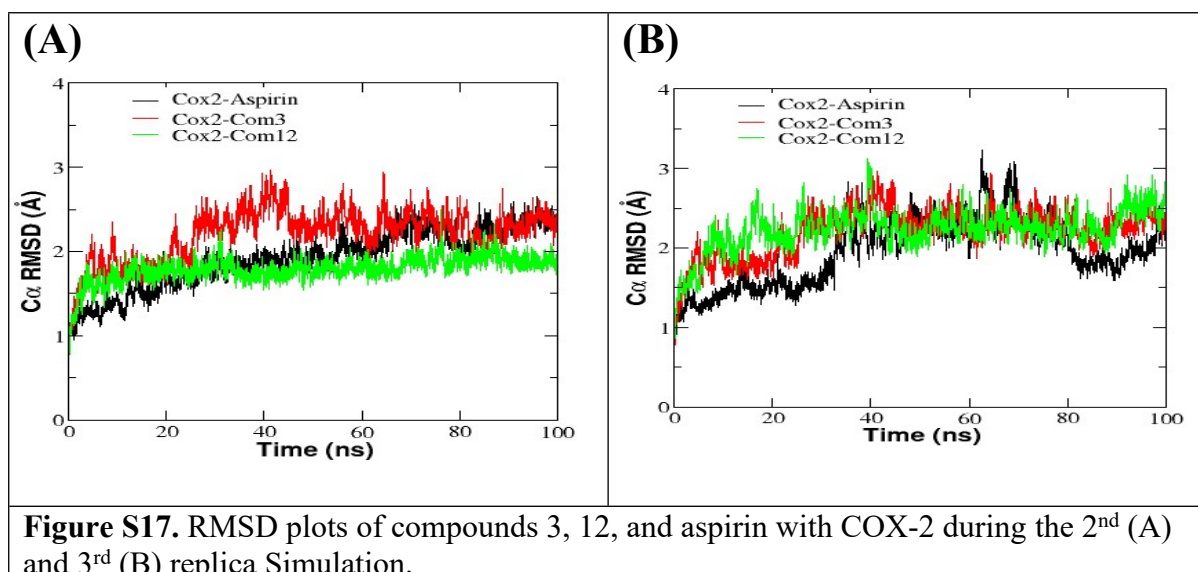

**Figure S17.** RMSD plots of compounds 3, 12, and aspirin with COX-2 during the 2<sup>nd</sup> (A) and 3<sup>rd</sup> (B) replica Simulation.

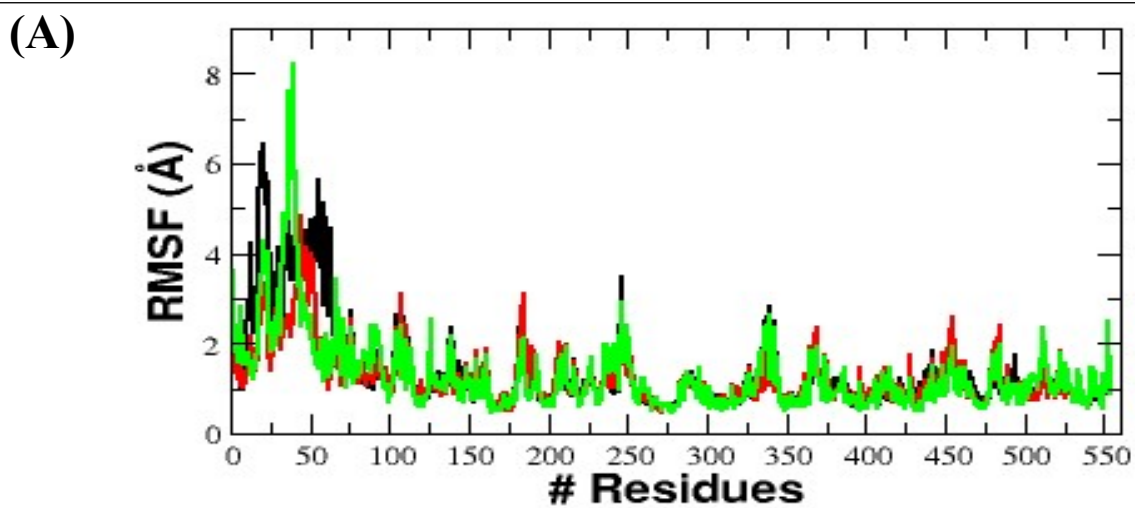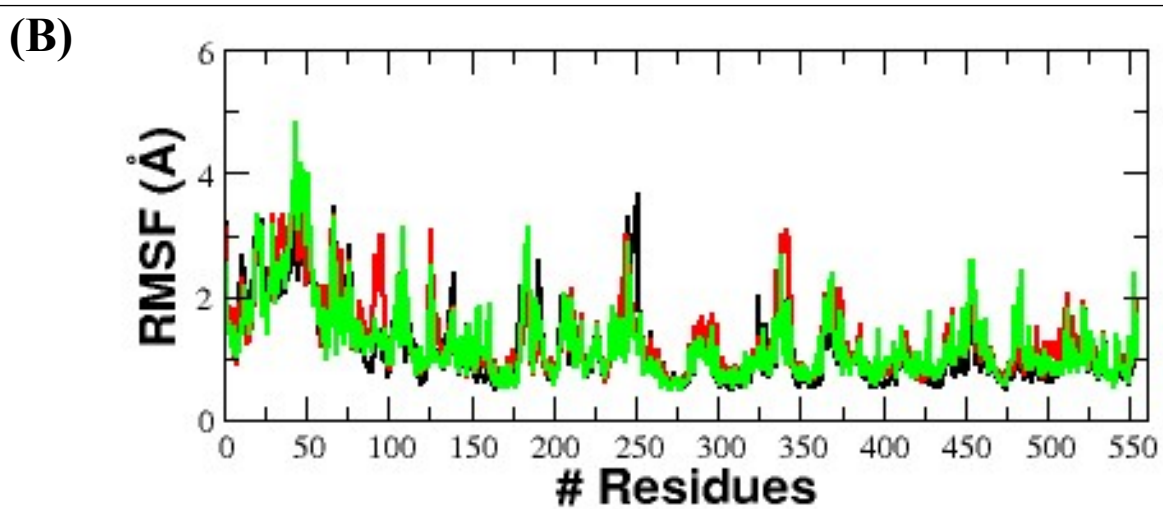

**Figure S18.** RMSF plots of compounds 3 (red), 12 (green), and aspirin (black) with COX-1 during the 2<sup>nd</sup> (A) and 3<sup>rd</sup> (B) replica Simulation

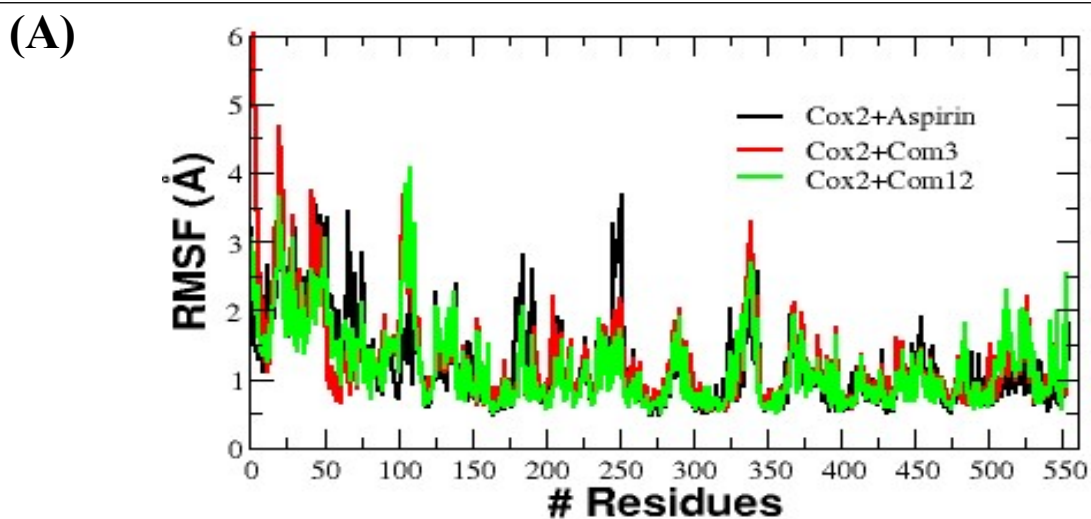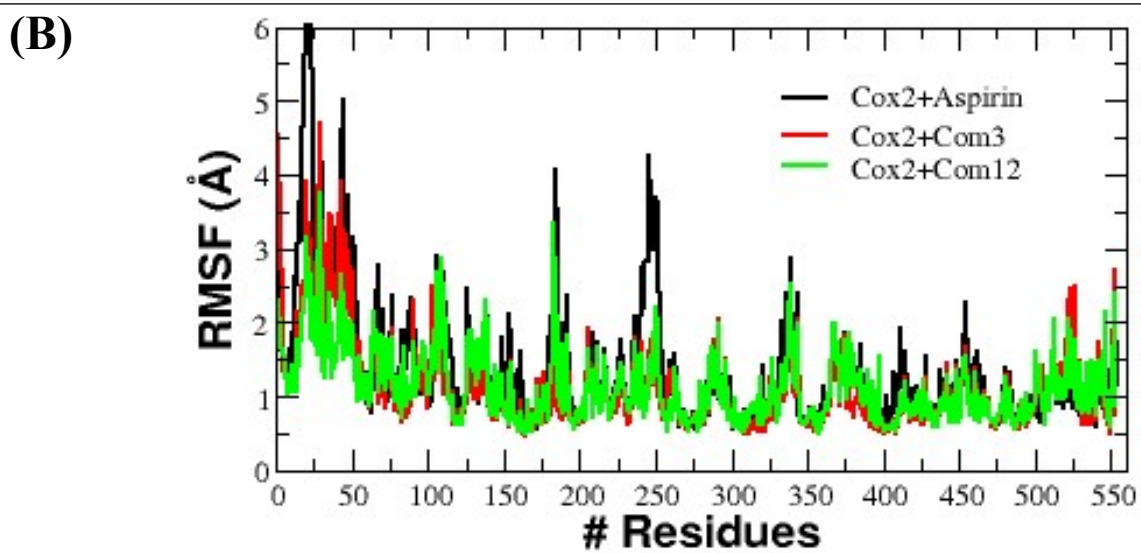

**Figure S19.** RMSF plots of compounds 3 (red), 12 (green), and aspirin (black) with COX-2 during the 2<sup>nd</sup> (A) and 3<sup>rd</sup> (B) replica Simulation.

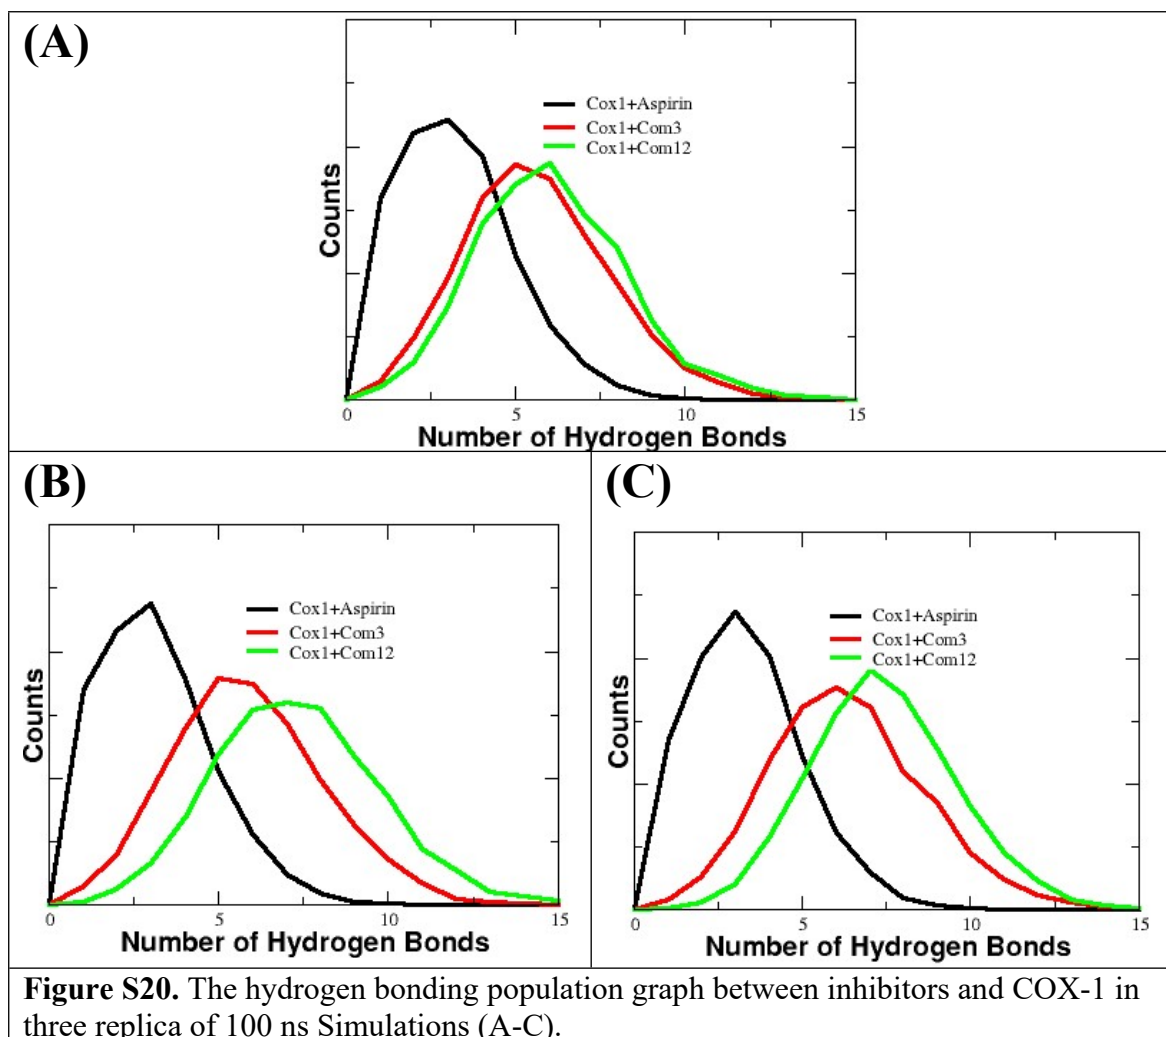

(A)

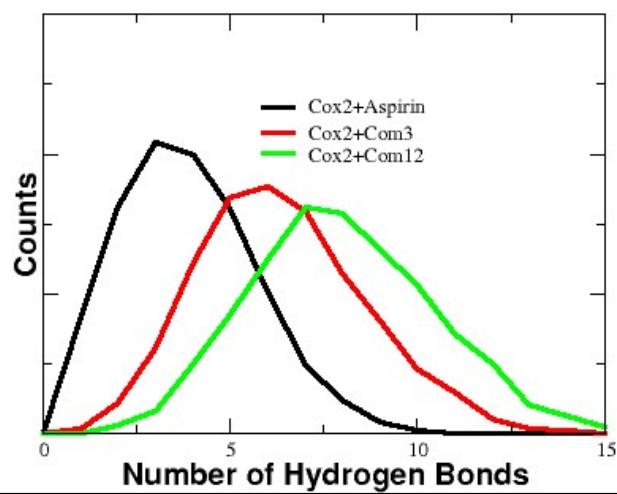

(B)

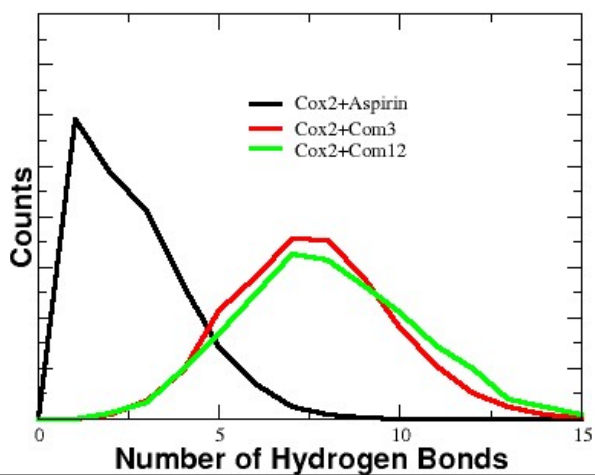

(C)

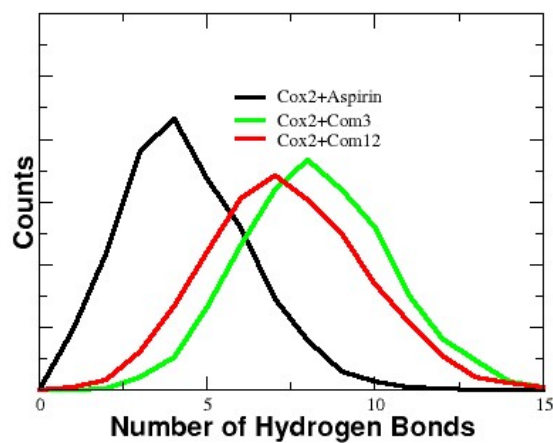

**Figure S21:** The hydrogen bonding population graph between inhibitors and COX-2 in three replicas of 100 ns Simulations (A-C)

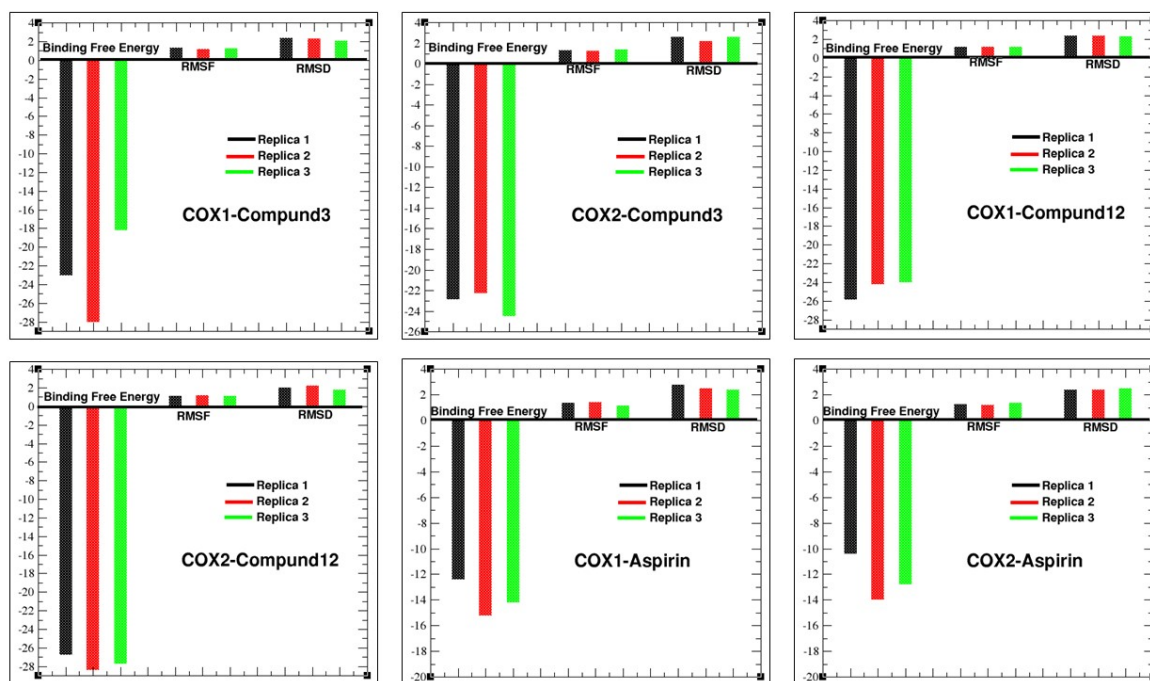

**Figure S22.** Cumulative diagram of RMSD, RMSF, and binding-free energy of compounds 3, 12, and aspirin with COX-1 and COX-2 during three replica simulations



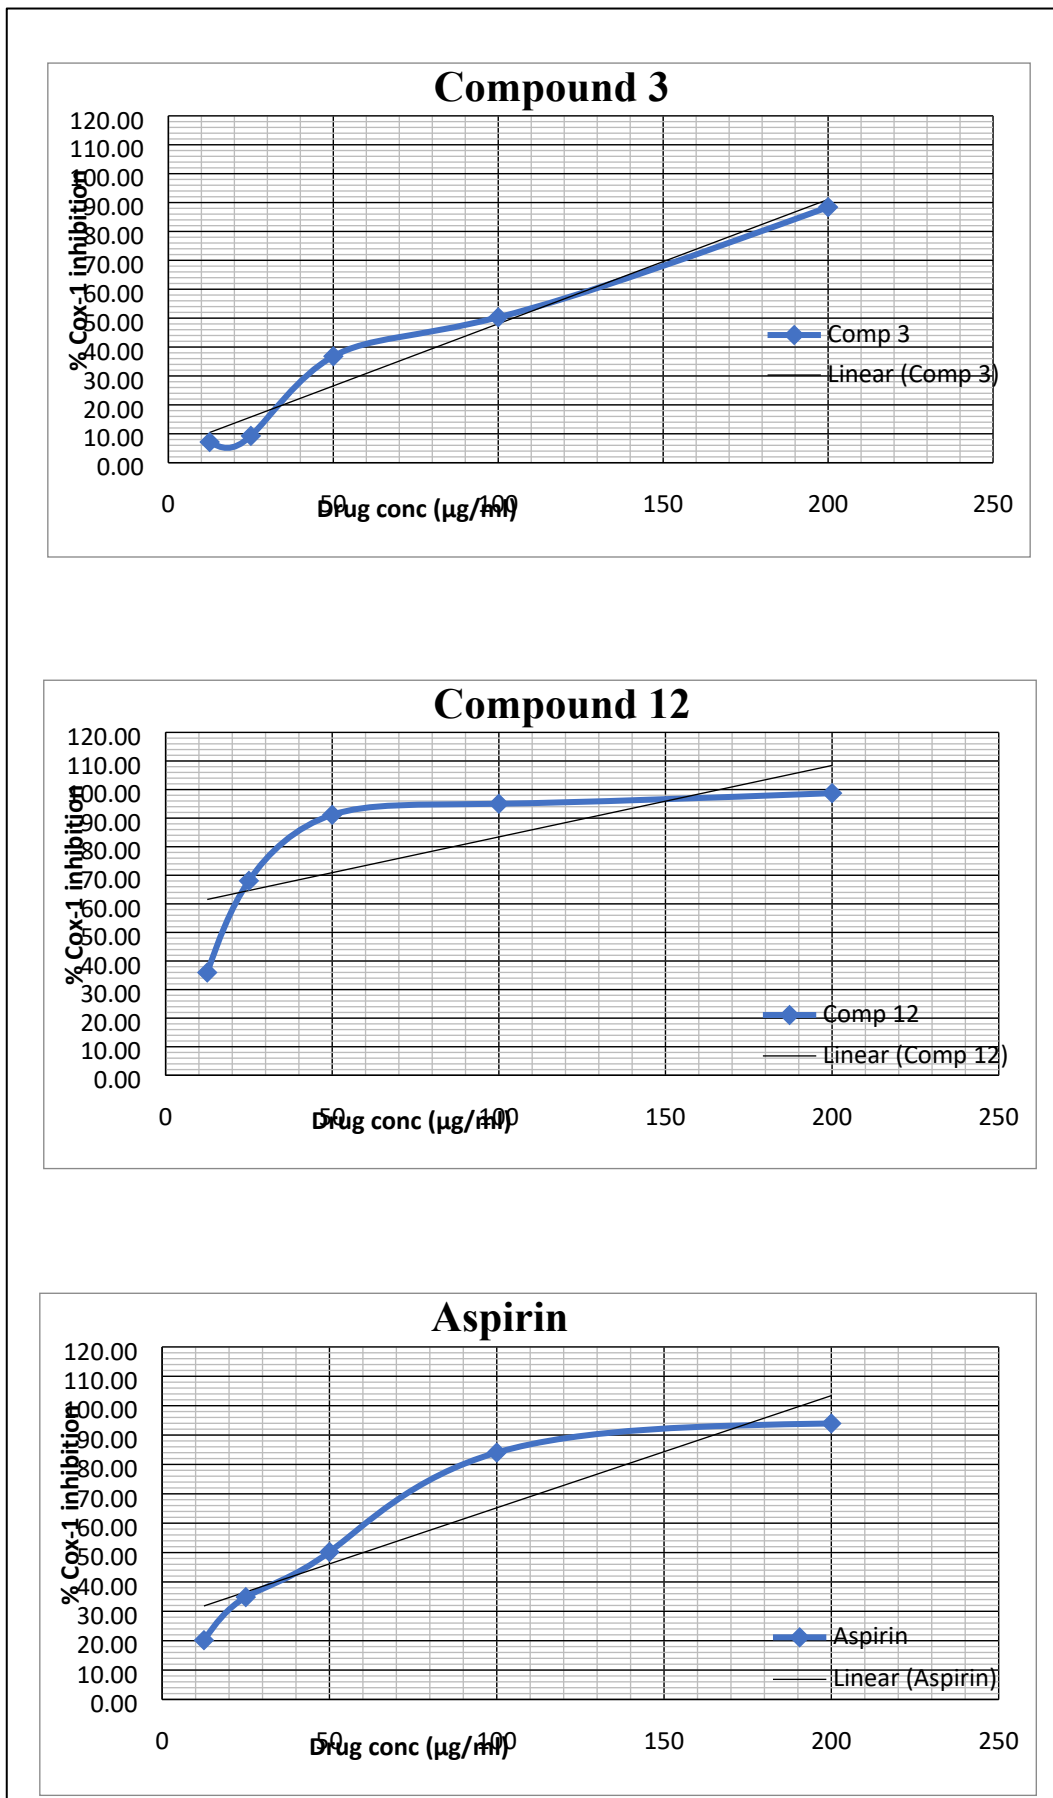

**Figure S23.** Data for the calculation of IC50 value of compounds 3, 12, and aspirin with COX-1 enzyme.

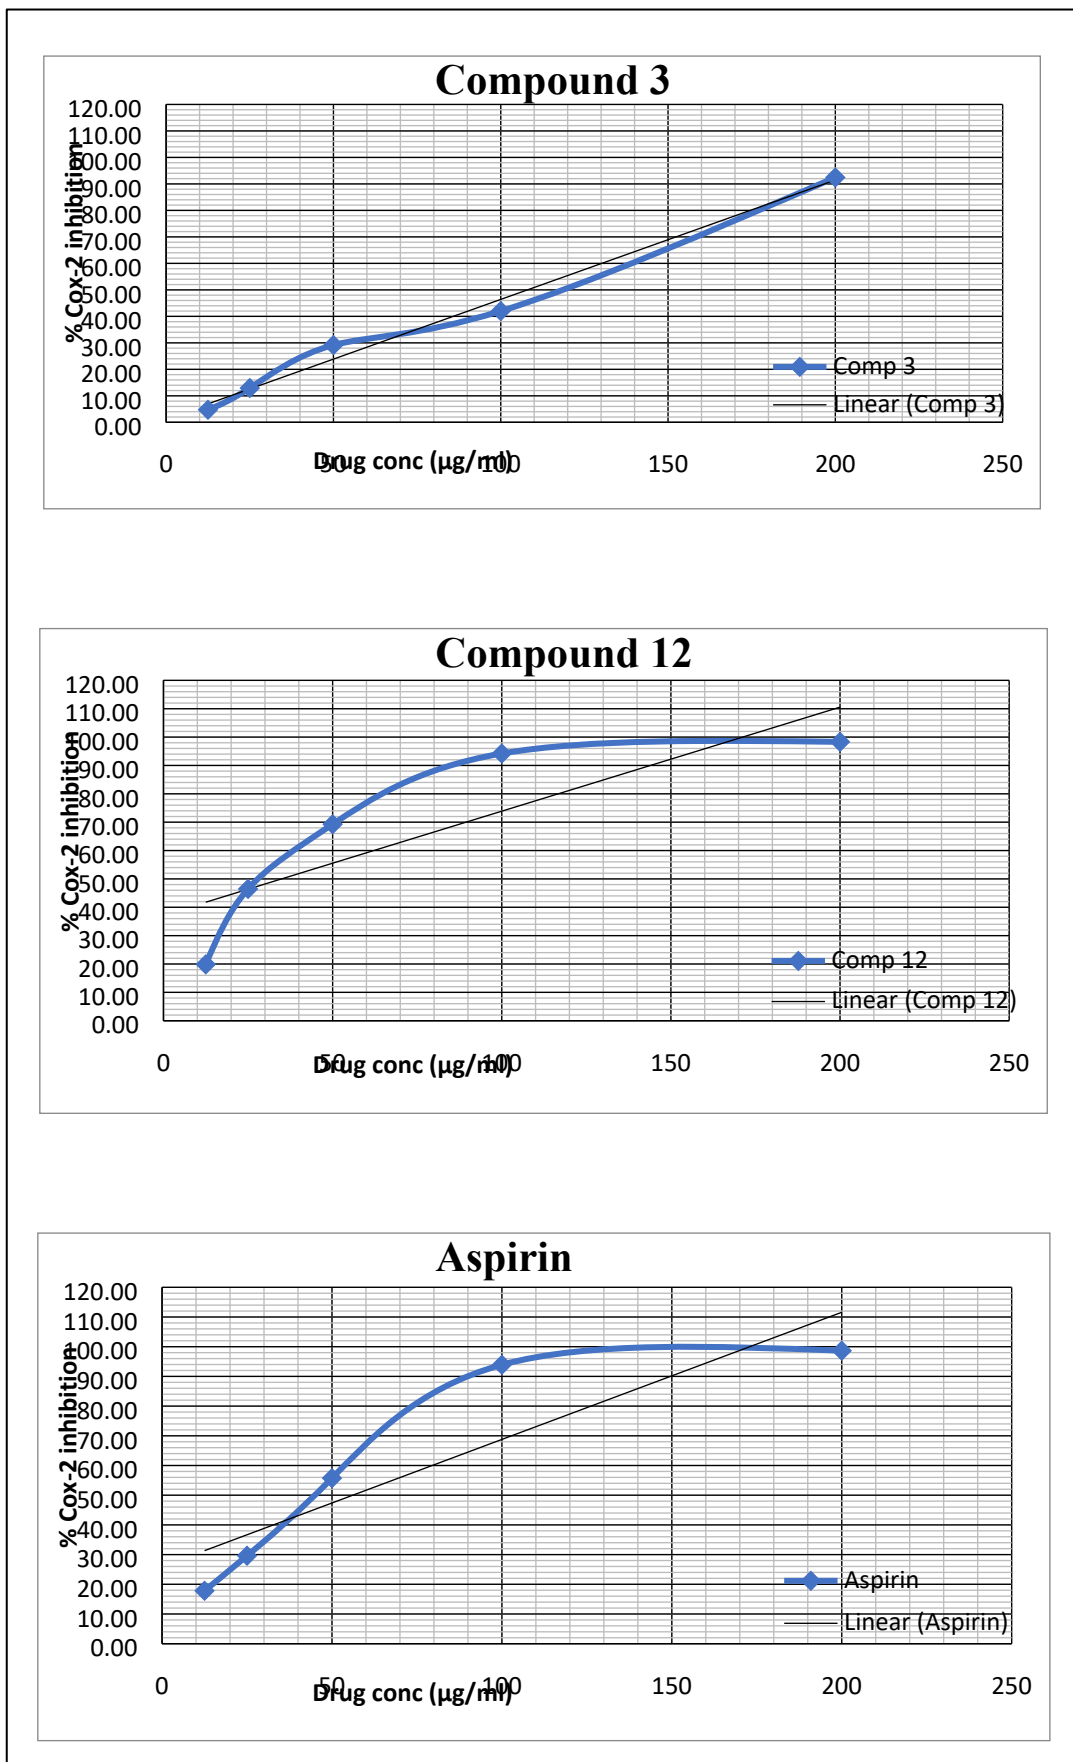

**Figure S24.** Data for the calculation of  $IC_{50}$  value of compounds 3, 12, and aspirin with COX-2 enzyme.

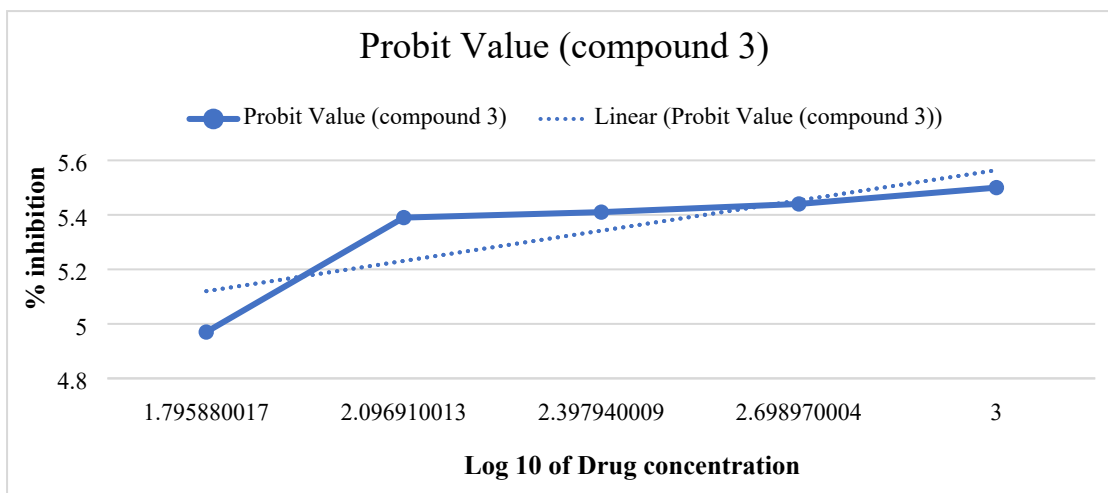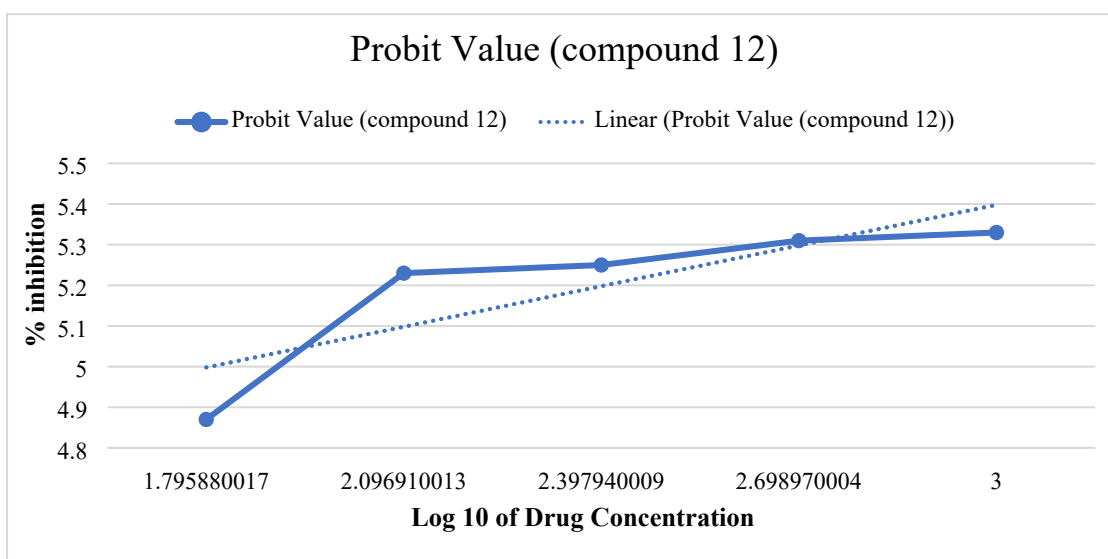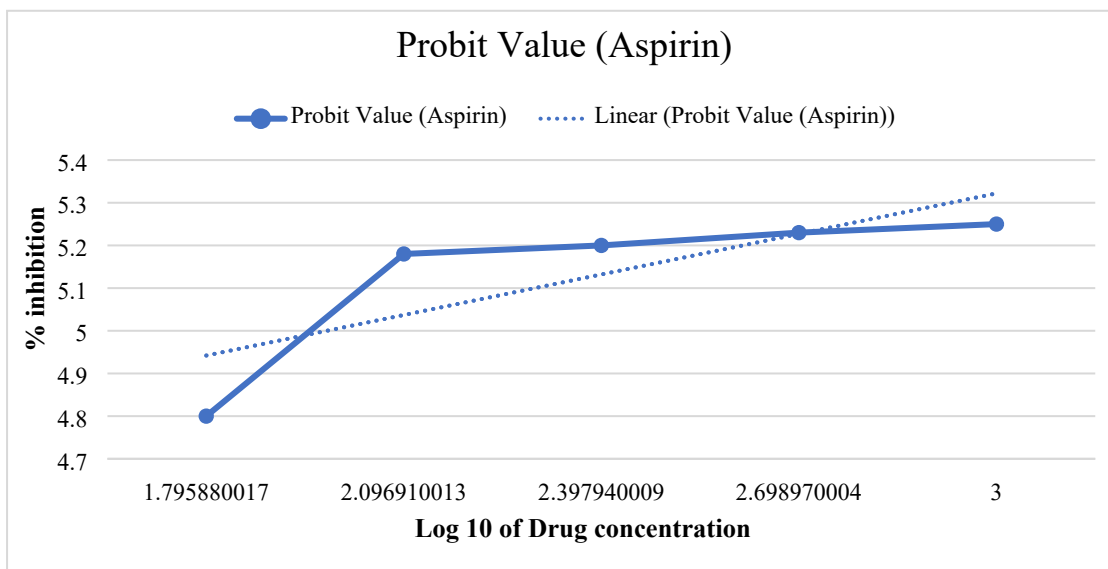

**Figure S25.** Data for the calculation of IC50 value of compounds 3, 12, and aspirin for the antiplatelet activity.

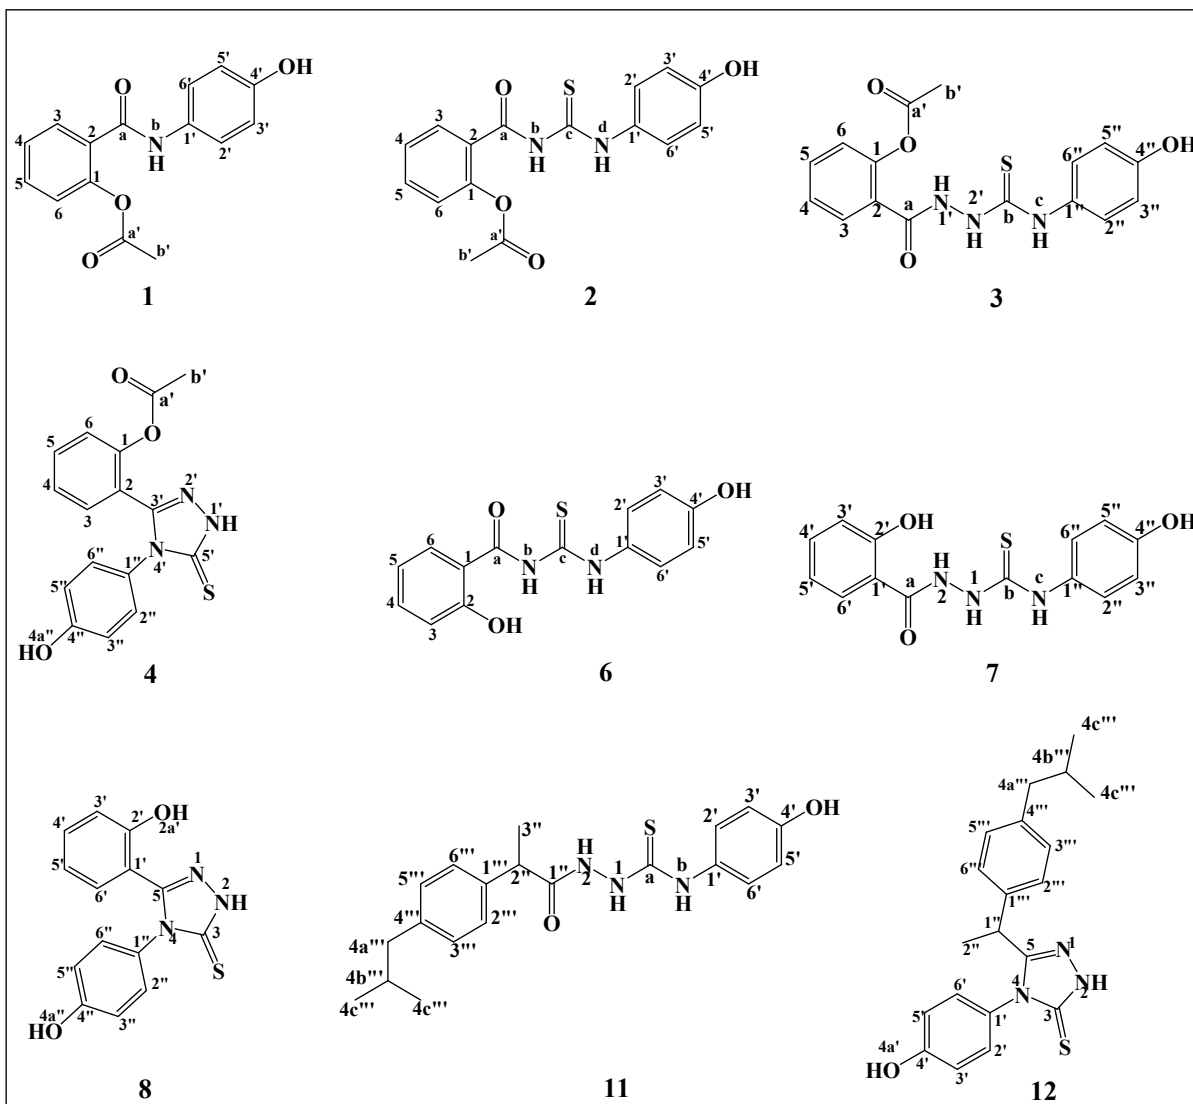

Note- The compound numbering and IUPAC nomenclature have been assigned using ChemDraw Professional 15.0 software.

**Figure S26.** Structures of newly synthesized compounds with numbering.

**Table S1.** ADMET features of compounds other than those selected for synthesis

| Compounds | MW     | % ABS | TPSA<br>(Å <sup>2</sup> ) | LogP | LogS  | GI   | P-gp | BBB | Lipinski's<br>rule | LD <sub>50</sub><br>(mg/kg) | Toxicity<br>class | Drug<br>Score |
|-----------|--------|-------|---------------------------|------|-------|------|------|-----|--------------------|-----------------------------|-------------------|---------------|
| 13        | 332.40 | 87.83 | 61.36                     | 4.28 | -7.66 | High | No   | Yes | Followed           | 936.83                      | 3                 | 0.67          |
| 14        | 406.50 | 68.45 | 117.51                    | 4.12 | -7.86 | High | No   | No  | Followed           | 1052.13                     | 3                 | 1.83          |
| 15        | 388.49 | 75.20 | 97.96                     | 4.49 | -7.88 | High | No   | No  | Followed           | 969.18                      | 3                 | 2.00          |
| 16        | 387.46 | 87.83 | 61.36                     | 4.49 | -8.48 | High | No   | No  | Violated           | 1119.46                     | 3                 | 1.03          |
| 17        | 461.36 | 68.45 | 117.51                    | 4.33 | -8.66 | Low  | No   | No  | Followed           | 1230.41                     | 3                 | 2.02          |
| 18        | 443.35 | 75.20 | 97.96                     | 5.01 | -8.69 | Low  | No   | No  | Violated           | 1269.85                     | 3                 | 2.24          |
| 19        | 335.37 | 91.98 | 49.33                     | 4.38 | -7.54 | High | Yes  | Yes | Violated           | 560.44                      | 3                 | 1.51          |
| 20        | 409.48 | 72.60 | 105.48                    | 4.09 | -7.74 | High | No   | No  | Followed           | 1393.92                     | 3                 | 2.01          |
| 21        | 391.46 | 29.64 | 85.93                     | 4.90 | -7.77 | High | Yes  | No  | Violated           | 939.09                      | 3                 | 1.05          |
| 22        | 341.31 | 85.00 | 69.56                     | 4.09 | -6.81 | High | No   | No  | Followed           | 881.35                      | 3                 | -0.59         |
| 23        | 415.41 | 65.63 | 125.71                    | 3.83 | -7.00 | Low  | No   | No  | Followed           | 1378.75                     | 3                 | 0.54          |
| 24        | 397.40 | 72.21 | 106.16                    | 4.36 | -7.03 | Low  | No   | No  | Followed           | 1553.25                     | 3                 | 0.52          |

**Table S2.** Predicted physicochemical, medicinal, excretion and toxicological parameters from SwissADME, Osiris DataWarrior and ADMETlab tools

| Compounds |     |     |         | Excretion               |                 | Toxicity    |                           | Prediction            |           |
|-----------|-----|-----|---------|-------------------------|-----------------|-------------|---------------------------|-----------------------|-----------|
|           | HBA | HBD | PAINS   | T <sub>1/2</sub><br>(h) | CL<br>ml/min/kg | Tumorigenic | Reproductive<br>effective | Skin<br>Sensitization | Mutagenic |
| 1         | 4   | 2   | 0 alert | 0.897                   | 1.725           | ●           | ●                         | ●                     | ●         |
| 2         | 4   | 3   | 0 alert | 0.892                   | 1.072           | ●           | ●                         | ●                     | ●         |
| 3         | 4   | 4   | 0 alert | 0.827                   | 1.131           | ●           | ●                         | ●                     | ●         |
| 4         | 4   | 2   | 0 alert | 1.285                   | 1.480           | ●           | ●                         | ●                     | ●         |
| 5         | 3   | 3   | 0 alert | 0.967                   | 1.803           | ●           | ●                         | ●                     | ●         |
| 6         | 3   | 4   | 0 alert | 0.962                   | 1.006           | ●           | ●                         | ●                     | ●         |
| 7         | 3   | 5   | 0 alert | 0.929                   | 1.190           | ●           | ●                         | ●                     | ●         |
| 8         | 3   | 3   | 0 alert | 1.391                   | 1.550           | ●           | ●                         | ●                     | ●         |
| 9         | 2   | 2   | 0 alert | 1.672                   | 2.218           | ●           | ●                         | ●                     | ●         |
| 10        | 2   | 3   | 0 alert | 1.742                   | 1.958           | ●           | ●                         | ●                     | ●         |
| 11        | 2   | 4   | 0 alert | 1.672                   | 1.722           | ●           | ●                         | ●                     | ●         |
| 12        | 2   | 2   | 0 alert | 1.946                   | 1.707           | ●           | ●                         | ●                     | ●         |
| Aspirin   | 4   | 1   | 0 alert | 0.895                   | 2.004           | ●           | ●                         | ●                     | ●         |
| Ibuprofen | 2   | 1   | 0 alert | 0.801                   | 0.536           | ●           | ●                         | ●                     | ●         |
| Celecoxib | 7   | 1   | 0 alert | 1.872                   | 0.618           | ●           | ●                         | ●                     | ●         |

Note: - HBA: hydrogen bond acceptor, HBD: hydrogen bond donor, PAINS- pan assay interference compounds, T<sub>1/2</sub>: half-life time, CL: clearance rate

● Toxic, ● slightly toxic, ● safe

**Table S3.** Interactions of compounds 3,12, aspirin, ibuprofen, and celecoxib with COX-1 from Discovery Studio Visualizer

| Compounds | Name                                              | Distance           | Category                   | Type                         |
|-----------|---------------------------------------------------|--------------------|----------------------------|------------------------------|
| 3         | A:PHE518:HN - :UNK1:O1                            | 2.9562             | Hydrogen Bond              | Conventional Hydrogen Bond   |
|           | A:SER530:HG - :UNK1:O3                            | 1.97968            | Hydrogen Bond              | Conventional Hydrogen Bond   |
|           | :UNK1:H6 - :UNK1:O2                               | 1.7416             | Hydrogen Bond              | Conventional Hydrogen Bond   |
|           | :UNK1:S1 - :UNK1:O2                               | 3.76464            | Hydrogen Bond              | Conventional Hydrogen Bond   |
|           | :UNK1:H1 - A:GLN192:OE1                           | 1.96565            | Hydrogen Bond              | Conventional Hydrogen Bond   |
|           | A:ILE523:CA - :UNK1:O4                            | 2.90951            | Hydrogen Bond              | Carbon Hydrogen Bond         |
|           | A:ILE523:CD1 - :UNK1                              | 3.77496            | Hydrophobic                | Pi-Sigma                     |
|           | A:MET522:SD - :UNK1                               | 5.99659            | Other                      | Pi-Sulfur                    |
|           | A:TRP387 - :UNK1                                  | 5.32366            | Hydrophobic                | Pi-Pi T-shaped               |
|           | A:GLY526:C,O;ALA527:N - :UNK1<br>:UNK1 - A:LEU352 | 3.67493<br>5.45511 | Hydrophobic<br>Hydrophobic | Amide-Pi Stacked<br>Pi-Alkyl |
| 12        | :UNK1:H21 - A:MET522:O                            | 1.80044            | Hydrogen Bond              | Conventional Hydrogen Bond   |
|           | A:ILE523:CA - :UNK1:N2                            | 3.71604            | Hydrogen Bond              | Carbon Hydrogen Bond         |
|           | A:ILE523:CG2 - :UNK1                              | 3.70587            | Hydrophobic                | Pi-Sigma                     |
|           | :UNK1:S1 - A:TRP387                               | 5.56252            | Other                      | Pi-Sulfur                    |
|           | :UNK1:S1 - A:TRP387                               | 4.59253            | Other                      | Pi-Sulfur                    |
|           | A:TRP387 - :UNK1                                  | 5.97936            | Hydrophobic                | Pi-Pi T-shaped               |
|           | A:ALA527 - :UNK1:C17                              | 3.53854            | Hydrophobic                | Alkyl                        |
|           | :UNK1:C17 - A:VAL349                              | 4.6748             | Hydrophobic                | Alkyl                        |

|           |                         |         |               |                            |
|-----------|-------------------------|---------|---------------|----------------------------|
|           | :UNK1:C12 - A:ILE523    | 4.61523 | Hydrophobic   | Alkyl                      |
|           | :UNK1 - A:LEU352        | 5.44247 | Hydrophobic   | Pi-Alkyl                   |
|           | :UNK1 - A:LEU352        | 4.56172 | Hydrophobic   | Pi-Alkyl                   |
|           | :UNK1 - A:VAL349        | 5.13873 | Hydrophobic   | Pi-Alkyl                   |
| Aspirin   | A:ALA527:HN - :UNL1:O   | 2.78627 | Hydrogen Bond | Conventional Hydrogen Bond |
|           | A:SER530:HG - :UNL1:O   | 1.99733 | Hydrogen Bond | Conventional Hydrogen Bond |
|           | A:MET522:SD - :UNL1     | 5.78959 | Other         | Pi-Sulfur                  |
|           | A:TRP387 - :UNL1        | 5.057   | Hydrophobic   | Pi-Pi T-shaped             |
| Ibuprofen | A:ARG120:HE - :UNL1:O   | 2.87362 | Hydrogen Bond | Conventional Hydrogen Bond |
|           | A:ARG120:HH21 - :UNL1:O | 2.40037 | Hydrogen Bond | Conventional Hydrogen Bond |
|           | :UNL1:H - A:TYR355:OH   | 2.14108 | Hydrogen Bond | Conventional Hydrogen Bond |
|           | A:ILE523:CG2 - :UNL1    | 3.52442 | Hydrophobic   | Pi-Sigma                   |
|           | A:TYR355 - :UNL1        | 5.05626 | Hydrophobic   | Pi-Pi T-shaped             |
|           | :UNL1:C - A:VAL349      | 5.32998 | Hydrophobic   | Alkyl                      |
|           | :UNL1:C - A:ILE523      | 4.05527 | Hydrophobic   | Alkyl                      |
|           | A:TYR355 - :UNL1:C      | 4.12718 | Hydrophobic   | Pi-Alkyl                   |
|           | A:PHE518 - :UNL1:C      | 4.73574 | Hydrophobic   | Pi-Alkyl                   |
|           | :UNL1 - A:LEU352        | 5.2533  | Hydrophobic   | Pi-Alkyl                   |
| Celecoxib | A:ILE517:HN - :UNL1:O   | 2.15627 | Hydrogen Bond | Conventional Hydrogen Bond |
|           | :UNL1:H - A:SER353:O    | 2.40538 | Hydrogen Bond | Conventional Hydrogen Bond |
|           | :UNL1:H - A:SER516:OG   | 2.119   | Hydrogen Bond | Conventional Hydrogen Bond |



|  |                       |         |               |                      |
|--|-----------------------|---------|---------------|----------------------|
|  | A:SER353:CB - :UNL1:N | 3.37675 | Hydrogen Bond | Carbon Hydrogen Bond |
|  | A:SER516:CB - :UNL1:O | 3.17226 | Hydrogen Bond | Carbon Hydrogen Bond |
|  | A:SER353:CA - :UNL1   | 3.30624 | Hydrophobic   | Pi-Sigma             |
|  | A:ILE523:CG2 - :UNL1  | 3.69443 | Hydrophobic   | Pi-Sigma             |
|  | :UNL1:S - A:HIS90     | 5.55944 | Other         | Pi-Sulfur            |
|  | :UNL1:C - A:MET522    | 4.54335 | Hydrophobic   | Alkyl                |
|  | :UNL1:C - A:VAL116    | 4.85726 | Hydrophobic   | Alkyl                |
|  | :UNL1:C - A:VAL349    | 5.47623 | Hydrophobic   | Alkyl                |
|  | :UNL1:C - A:LEU359    | 5.0707  | Hydrophobic   | Alkyl                |
|  | A:TYR355 - :UNL1:C    | 5.22082 | Hydrophobic   | Pi-Alkyl             |
|  | A:TRP387 - :UNL1:C    | 4.77939 | Hydrophobic   | Pi-Alkyl             |
|  | A:PHE518 - :UNL1:C    | 4.52176 | Hydrophobic   | Pi-Alkyl             |
|  | :UNL1 - A:VAL349      | 5.13022 | Hydrophobic   | Pi-Alkyl             |
|  | :UNL1 - A:ALA527      | 4.22688 | Hydrophobic   | Pi-Alkyl             |
|  | :UNL1 - A:LEU352      | 5.04157 | Hydrophobic   | Pi-Alkyl             |
|  | :UNL1 - A:ILE523      | 5.23641 | Hydrophobic   | Pi-Alkyl             |
|  | :UNL1 - A:ALA527      | 4.49751 | Hydrophobic   | Pi-Alkyl             |
|  | :UNL1 - A:LEU352      | 5.25538 | Hydrophobic   | Pi-Alkyl             |

**Table S4.** Interactions of compounds 3,12, aspirin, ibuprofen, and celecoxib with COX-2 from Discovery Studio Visualizer

| Compounds                     | Name                          | Distance    | Category         | Type                       |
|-------------------------------|-------------------------------|-------------|------------------|----------------------------|
| 3                             | A:PHE504:HN - :UNK1:O1        | 2.74021     | Hydrogen Bond    | Conventional Hydrogen Bond |
|                               | A:SER516:HG - :UNK1:O3        | 1.95556     | Hydrogen Bond    | Conventional Hydrogen Bond |
|                               | :UNK1:H6 - A:VAL509:O         | 2.42338     | Hydrogen Bond    | Conventional Hydrogen Bond |
|                               | :UNK1:H1 - A:GLN178:OE1       | 2.02181     | Hydrogen Bond    | Conventional Hydrogen Bond |
|                               | :UNK1:H1 - A:LEU338:O         | 2.59717     | Hydrogen Bond    | Conventional Hydrogen Bond |
|                               | A:VAL509:CG2 - :UNK1          | 3.60279     | Hydrophobic      | Pi-Sigma                   |
|                               | A:MET508:SD - :UNK1           | 5.0845      | Other            | Pi-Sulfur                  |
|                               | A:TYR371 - :UNK1              | 5.89196     | Hydrophobic      | Pi-Pi T-shaped             |
| 12                            | A:GLY512:C,O;ALA513:N - :UNK1 | 4.07177     | Hydrophobic      | Amide-Pi Stacked           |
|                               | A:VAL509:CA - :UNK1:N2        | 2.91897     | Hydrogen Bond    | Carbon Hydrogen Bond       |
|                               | A:VAL509:CG2 - :UNK1          | 3.92178     | Hydrophobic      | Pi-Sigma                   |
|                               | :UNK1:C14 - A:HIS75           | 3.78461     | Hydrophobic      | Pi-Sigma                   |
|                               | A:MET508:SD - :UNK1           | 5.24332     | Other            | Pi-Sulfur                  |
|                               | :UNK1:S1 - A:TRP373           | 5.06532     | Other            | Pi-Sulfur                  |
|                               | :UNK1:S1 - A:TRP373           | 4.47975     | Other            | Pi-Sulfur                  |
|                               | A:TRP373 - :UNK1              | 5.73736     | Hydrophobic      | Pi-Pi T-shaped             |
| A:GLY512:C,O;ALA513:N - :UNK1 | 4.50941                       | Hydrophobic | Amide-Pi Stacked |                            |
|                               | 3.32681                       | Hydrophobic | Alkyl            |                            |

|           |                               |         |               |                            |
|-----------|-------------------------------|---------|---------------|----------------------------|
|           | A:ALA502 - :UNK1:C12          | 3.39136 | Hydrophobic   | Alkyl                      |
|           | A:ALA513 - :UNK1:C17          | 4.46524 | Hydrophobic   | Alkyl                      |
|           | :UNK1:C17 - A:VAL509          | 4.52228 | Hydrophobic   | Alkyl                      |
|           | :UNK1:C12 - A:ARG499          | 5.08708 | Hydrophobic   | Alkyl                      |
|           | :UNK1:C12 - A:VAL509          | 4.60226 | Hydrophobic   | Pi-Alkyl                   |
|           | A:HIS75 - :UNK1:C12           | 4.78394 | Hydrophobic   | Pi-Alkyl                   |
|           | :UNK1 - A:VAL509              | 4.89884 | Hydrophobic   | Pi-Alkyl                   |
|           | :UNK1 - A:LEU338              | 5.21132 | Hydrophobic   | Pi-Alkyl                   |
|           | :UNK1 - A:VAL335              | 5.41693 | Hydrophobic   | Pi-Alkyl                   |
|           | :UNK1 - A:LEU338              |         |               |                            |
| Aspirin   | A:SER516:HG - :UNL1:O         | 1.90095 | Hydrogen Bond | Conventional Hydrogen Bond |
|           | A:MET508:SD - :UNL1           | 5.38311 | Other         | Pi-Sulfur                  |
|           | A:PHE504 - :UNL1              | 5.68346 | Hydrophobic   | Pi-Pi Stacked              |
|           | A:GLY512:C,O;ALA513:N - :UNL1 | 3.79773 | Hydrophobic   | Amide-Pi Stacked           |
| Ibuprofen | A:ARG499:HH12 - :UNL1:O       | 2.06873 | Hydrogen Bond | Conventional Hydrogen Bond |
|           | :UNL1:H - A:PHE504:O          | 2.15225 | Hydrogen Bond | Conventional Hydrogen Bond |
|           | A:VAL509:CG2 - :UNL1          | 3.73666 | Hydrophobic   | Pi-Sigma                   |
|           | A:ALA502 - :UNL1:C            | 3.42614 | Hydrophobic   | Alkyl                      |
|           | :UNL1:C - A:LEU338            | 4.33802 | Hydrophobic   | Alkyl                      |
|           | A:HIS75 - :UNL1:C             | 4.81816 | Hydrophobic   | Pi-Alkyl                   |
|           | A:PHE504 - :UNL1:C            | 4.78367 | Hydrophobic   | Pi-Alkyl                   |

|           | :UNL1 - A:LEU338        | 5.05159 | Hydrophobic   | Pi-Alkyl                   |
|-----------|-------------------------|---------|---------------|----------------------------|
| Celecoxib | A:ARG499:HH12 - :UNL1:O | 2.64895 | Hydrogen Bond | Conventional Hydrogen Bond |
|           | A:ILE503:HN - :UNL1:O   | 3.04467 | Hydrogen Bond | Conventional Hydrogen Bond |
|           | A:PHE504:HN - :UNL1:O   | 2.18854 | Hydrogen Bond | Conventional Hydrogen Bond |
|           | :UNL1:H - A:LEU338:O    | 2.09329 | Hydrogen Bond | Conventional Hydrogen Bond |
|           | :UNL1:H - A:GLN178:OE1  | 2.11807 | Hydrogen Bond | Conventional Hydrogen Bond |
|           | A:SER339:CB - :UNL1:N   | 3.41    | Hydrogen Bond | Carbon Hydrogen Bond       |
|           | A:VAL335:CG1 - :UNL1    | 3.76658 | Hydrophobic   | Pi-Sigma                   |
|           | A:SER339:CA - :UNL1     | 3.51185 | Hydrophobic   | Pi-Sigma                   |
|           | A:VAL509:CG1 - :UNL1    | 3.96631 | Hydrophobic   | Pi-Sigma                   |
|           | A:VAL509:CG2 - :UNL1    | 3.77583 | Hydrophobic   | Pi-Sigma                   |
|           | :UNL1:C - A:LEU370      | 5.14177 | Hydrophobic   | Alkyl                      |
|           | :UNL1:C - A:MET508      | 4.32464 | Hydrophobic   | Alkyl                      |
|           | :UNL1:C - A:VAL335      | 4.68521 | Hydrophobic   | Alkyl                      |
|           | :UNL1:C - A:LEU345      | 4.98995 | Hydrophobic   | Alkyl                      |
|           | A:TYR341 - :UNL1:C      | 5.14782 | Hydrophobic   | Pi-Alkyl                   |
|           | A:TRP373 - :UNL1:C      | 5.28007 | Hydrophobic   | Pi-Alkyl                   |
|           | A:TRP373 - :UNL1:C      | 4.50065 | Hydrophobic   | Pi-Alkyl                   |
|           | A:PHE504 - :UNL1:C      | 4.45339 | Hydrophobic   | Pi-Alkyl                   |
|           | :UNL1 - A:ALA513        | 4.33015 | Hydrophobic   | Pi-Alkyl                   |
|           | :UNL1 - A:LEU338        | 5.37761 | Hydrophobic   | Pi-Alkyl                   |

|  |                  |         |             |          |
|--|------------------|---------|-------------|----------|
|  | :UNL1 - A:VAL509 | 4.96206 | Hydrophobic | Pi-Alkyl |
|  | :UNL1 - A:ALA513 | 4.84037 | Hydrophobic | Pi-Alkyl |

**Table S5.** Average RMSD analysis of compounds 3, 12, and aspirin with COX-1 and COX-2 isozymes during the three replicas

| S. No. | Complexes         | RMSD Analysis         |                       |                       | Average RMSD (Å) |
|--------|-------------------|-----------------------|-----------------------|-----------------------|------------------|
|        |                   | Replica 1 (Å)<br>± SD | Replica 2 (Å)<br>± SD | Replica 3 (Å)<br>± SD |                  |
| 1      | Compound 12_COX-1 | 2.37± 0.272           | 2.40± 0.22            | 2.33± 0.21            | 2.37             |
| 2      | Compound 12_COX-2 | 2.00± 0.207           | 2.22± 0.407           | 1.80± 0.307           | 2.01             |
| 3      | Compound 3_COX-1  | 2.36±0.14             | 2.33±0.24             | 2.05± 0.264           | 2.24             |
| 4      | Compound 3_COX-2  | 2.6±0.197             | 2.20±0.197            | 2.61±0.97             | 2.46             |
| 5      | Aspirin_COX-1     | 2.75± 0.40            | 2.47±0.21             | 2.41± 0.25            | 2.55             |
| 6      | Aspirin_COX-2     | 2.37± 0.359           | 2.39±0.388            | 2.49± 0.388           | 2.41             |

**Table S6.** Average RMSF analysis of compounds 3, 12, and aspirin with COX-1 and COX-2 isozymes during the three replicas

| S. No. | Complexes         | RMSF Analysis         |                       |                       | Average RMSF (Å) |
|--------|-------------------|-----------------------|-----------------------|-----------------------|------------------|
|        |                   | Replica 1 (Å)<br>± SD | Replica 2 (Å)<br>± SD | Replica 3 (Å)<br>± SD |                  |
| 1      | Compound 12_COX-1 | 1.20± 0.11            | 1.19± 0.02            | 1.22± 0.10            | 1.20             |
| 2      | Compound 12_COX-2 | 1.10± 0.15            | 1.15± 0.07            | 1.12± 0.07            | 1.13             |
| 3      | Compound 3_COX-1  | 1.30±0.14             | 1.17±0.10             | 1.23± 0.09            | 1.24             |
| 4      | Compound 3_COX-2  | 1.3 ±0.09             | 1.27±0.09             | 1.40±0.10             | 1.32             |
| 5      | Aspirin_COX-1     | 1.36± 0.1             | 1.40±0.10             | 1.20± 0.06            | 1.33             |
| 6      | Aspirin_COX-2     | 1.23± 0.08            | 1.20±0.08             | 1.35± 0.08            | 1.27             |

**Table S7. Binding free energy components of COX-1 and Aspirin**

| Energy Component    | COX-1-aspirin      |                    |                    |
|---------------------|--------------------|--------------------|--------------------|
|                     | Replica 1 (Å) ± SD | Replica 2 (Å) ± SD | Replica 3 (Å) ± SD |
| $\Delta E_{VDW}$    | -28.89             | -30.60             | -28.92             |
| $\Delta E_{ELEC}$   | -7.28              | -4.92              | -6.25              |
| $\Delta EPB$        | 26.21              | 22.71              | 23.47              |
| $\Delta EPB_{np}$   | -2.47              | -2.43              | -2.49              |
| $\Delta E_{Disper}$ | 0.00               | 0.00               | 0.00               |
| $\Delta G$          | -12.4±1.1          | -15.24             | -14.20             |

Binding free energy ( $\Delta G$ ) of COX-1 and ligand complex was calculated from the 100 ns

simulation. The molecular-mechanical energy calculations were performed using MM/PBSA analysis.  $\Delta E_{\text{ELEC}}$ ,  $\Delta E_{\text{VDW}}$ ,  $\Delta \text{EPB}_{\text{np}}$ , and  $\Delta \text{EPB}_{\text{solv}}$  are referred to as the electrostatic, Vander Waals, polar, the non-polar contribution to the solvation energy and the electrostatic contribution to the solvation energy, respectively.

**Table S8. Binding free energy components of COX-1, and Compound 3**

| Energy Component                | COX-1-Compound 3   |                    |                    |
|---------------------------------|--------------------|--------------------|--------------------|
|                                 | Replica 1 (Å) ± SD | Replica 2 (Å) ± SD | Replica 3 (Å) ± SD |
| $\Delta E_{\text{VDW}}$         | -0.03              | -47.84             | -49.03             |
| $\Delta E_{\text{ELEC}}$        | -33.78             | -41.70             | -17.084            |
| $\Delta \text{EPB}$             | 59.19              | 64.99              | 52.72              |
| $\Delta \text{EPB}_{\text{np}}$ | -4.48              | -4.22              | -4.22              |
| $\Delta E_{\text{Disper}}$      | 0.00               | 0.00               | 0.00               |
| $\Delta G$                      | -22.89±1.7         | -28.0±1.7          | -18.21±1.43        |

Binding free energy ( $\Delta G$ ) of *COX-1 protein* and ligand complex was calculated from the 100 ns simulation. The molecular-mechanical energy calculations were performed using MM/PBSA analysis.  $\Delta E_{\text{ELEC}}$ ,  $\Delta E_{\text{VDW}}$ ,  $\Delta \text{EPB}_{\text{np}}$ , and  $\Delta \text{EPB}_{\text{solv}}$  are referred to as the electrostatic, Vander Waals, polar, the non-polar contribution to the solvation energy, and the electrostatic contribution to the solvation energy, respectively.

**Table S9. Binding free energy components of COX-1 and Compound 12**

| Energy Component                | COX-1-Compound12   |                    |                    |
|---------------------------------|--------------------|--------------------|--------------------|
|                                 | Replica 1 (Å) ± SD | Replica 2 (Å) ± SD | Replica 3 (Å) ± SD |
| $\Delta E_{\text{VDW}}$         | -48.73             | -48.57             | -48.73             |
| $\Delta E_{\text{ELEC}}$        | -11.19             | -14.96             | -11.19             |
| $\Delta \text{EPB}$             | 40.48              | 44.01              | 40.48              |
| $\Delta \text{EPB}_{\text{np}}$ | -4.64              | -4.7061            | -4.64              |
| $\Delta E_{\text{Disper}}$      | 0.00               | 0.00               | 0.00               |
| $\Delta G$                      | -25.86±0.25        | -24.22±1.4         | -24.01±1.5         |

Binding free energy ( $\Delta G$ ) of *COX-1 protein* and ligand complex was calculated from the 100 ns simulation. The molecular-mechanical energy calculations were performed using MM/PBSA analysis.  $\Delta E_{\text{ELEC}}$ ,  $\Delta E_{\text{VDW}}$ ,  $\Delta \text{EPB}_{\text{np}}$ , and  $\Delta \text{EPB}_{\text{solv}}$  are referred to as the electrostatic, Vander Waals, polar, the non-polar contribution to the solvation energy, and the electrostatic contribution to the solvation energy, respectively.

**Table S10. Binding free energy components of COX-2 and Aspirin**

| Energy Component                | COX-2-Aspirin      |                    |                    |
|---------------------------------|--------------------|--------------------|--------------------|
|                                 | Replica 1 (Å) ± SD | Replica 2 (Å) ± SD | Replica 3 (Å) ± SD |
| $\Delta E_{\text{VDW}}$         | -29.19             | -26.84             | -290.3             |
| $\Delta E_{\text{ELEC}}$        | -9.18              | -19.42             | -2.084             |
| $\Delta \text{EPB}$             | 30.12              | 33.98              | 20.82              |
| $\Delta \text{EPB}_{\text{np}}$ | -2.48              | -2.35              | -2.52              |
| $\Delta E_{\text{Disper}}$      | 0.00               | 0.00               | 0.00               |
| $\Delta G$                      | -10.4±1.2          | -14.0±0.85         | -12.81±1.33        |

Binding free energy ( $\Delta G$ ) of *COX-2 protein* and ligand complex was calculated from the 100

ns simulation. The molecular-mechanical energy calculations were performed using MM/PBSA analysis.  $\Delta E_{\text{ELEC}}$ ,  $\Delta E_{\text{VDW}}$ ,  $\Delta \text{EPB}_{\text{np}}$  and  $\Delta \text{EPB}_{\text{solv}}$  are referred to as the electrostatic, Vander Waals, polar, the non-polar contribution to the solvation energy, and the electrostatic contribution to the solvation energy, respectively.

**Table S11. Binding free energy components of COX-2 and Compound 3**

| Energy Component                | COX-2-Compound 3   |                    |                    |
|---------------------------------|--------------------|--------------------|--------------------|
|                                 | Replica 1 (Å) ± SD | Replica 2 (Å) ± SD | Replica 3 (Å) ± SD |
| $\Delta E_{\text{VDW}}$         | -43.32             | -45.34             | -43.89             |
| $\Delta E_{\text{ELEC}}$        | -24.04             | -32.81             | -29.86             |
| $\Delta \text{EPB}$             | 48.46              | 59.61              | 53.19              |
| $\Delta \text{EPB}_{\text{np}}$ | -3.95              | -3.78              | -3.90              |
| $\Delta E_{\text{Disper}}$      | 0.00               | 0.00               | 0.00               |
| $\Delta G$                      | -22.86±1.4         | -22.30±2.5         | -24.51±0.59        |

Binding free energy ( $\Delta G$ ) of *COX-2 protein* and ligand complex was calculated from the 100 ns simulation. The molecular-mechanical energy calculations were performed using MM/PBSA analysis.  $\Delta E_{\text{ELEC}}$ ,  $\Delta E_{\text{VDW}}$ ,  $\Delta \text{EPB}_{\text{np}}$ , and  $\Delta \text{EPB}_{\text{solv}}$  are referred to as the electrostatic, Vander Waals, polar, the non-polar contribution to the solvation energy, and the electrostatic contribution to the solvation energy, respectively.

**Table S12. Binding free energy components of COX-2 and Compound 12**

| Energy Component                | COX-2-Compound12   |                    |                    |
|---------------------------------|--------------------|--------------------|--------------------|
|                                 | Replica 1 (Å) ± SD | Replica 2 (Å) ± SD | Replica 3 (Å) ± SD |
| $\Delta E_{\text{VDW}}$         | -48.35             | -50.90             | -48.21             |
| $\Delta E_{\text{ELEC}}$        | -14.51             | -10.33             | -11.64             |
| $\Delta \text{EPB}$             | 40.57              | 37.46              | 36.53              |
| $\Delta \text{EPB}_{\text{np}}$ | -4.45              | -4.50              | -4.41              |
| $\Delta E_{\text{Disper}}$      | 0.00               | 0.00               | 0.00               |
| $\Delta G$                      | -26.76±0.95        | -28.40±1.28        | -27.73±0.55        |

Binding free energy ( $\Delta G$ ) of *COX-2 protein* and ligand complex was calculated from the 100 ns simulation. The molecular-mechanical energy calculations were performed using MM/PBSA analysis.  $\Delta E_{\text{ELEC}}$ ,  $\Delta E_{\text{VDW}}$ ,  $\Delta \text{EPB}_{\text{np}}$ , and  $\Delta \text{EPB}_{\text{solv}}$  are referred to as the electrostatic, Vander Waals, polar, the non-polar contribution to the solvation energy, and the electrostatic contribution to the solvation energy, respectively.

**Table S13. Average Binding free energy (kcal/mol) and Docking Energy of Com3, Com12, and Aspirin with COX-1/COX-2 enzyme**

|                   | Aspirin_C<br>OX-2 | Aspirin-<br>COX-1 | Com3-<br>COX-2 | Com3-COX-<br>1 | Com12-<br>COX-2 | Com12-<br>COX-1 |
|-------------------|-------------------|-------------------|----------------|----------------|-----------------|-----------------|
| $\Delta G$        | -19.1±2.2         | -20.2±2.1         | -31.6±1.9      | -31.23±1.8     | -36.2±2.4       | -35.0±2.3       |
| Docking<br>Energy | -6.40             | -4.42             | -9.73          | -9.80          | -10.11          | -10.23          |

Binding free energy ( $\Delta G$ ) of *COX-2/COX-1* protein and ligand complex was calculated from the 100 ns simulation. The molecular-mechanical energy calculations were performed using MM/GBSA in Amber18. and docking energies in Kcal/mol (Pre MD simulations).



**Table S14.** The percentage inhibition of compounds 3, 12, and aspirin against COX-1 and COX-2 enzymes at specific concentrations.

| Compounds | Conc. ( $\mu\text{g/mL}$ ) | % COX-1 inhibition $\pm$ SD | % COX-2 inhibition $\pm$ SD |
|-----------|----------------------------|-----------------------------|-----------------------------|
| 3         | 12.5                       | 7.15 $\pm$ 1.59             | 4.74 $\pm$ 0.57             |
|           | 25                         | 9.26 $\pm$ 1.63             | 12.94 $\pm$ 0.84            |
|           | 50                         | 36.80 $\pm$ 0.65            | 29.16 $\pm$ 0.38            |
|           | 100                        | 50.30 $\pm$ 1.14            | 42.01 $\pm$ 0.91            |
|           | 200                        | 88.41 $\pm$ 0.27            | 92.44 $\pm$ 0.39            |
| 12        | 12.5                       | 35.97 $\pm$ 0.76            | 19.86 $\pm$ 4.26            |
|           | 25                         | 68.06 $\pm$ 0.87            | 46.46 $\pm$ 0.83            |
|           | 50                         | 91.17 $\pm$ 0.35            | 69.26 $\pm$ 0.27            |
|           | 100                        | 95.04 $\pm$ 0.13            | 94.21 $\pm$ 0.17            |
|           | 200                        | 98.74 $\pm$ 0.08            | 98.32 $\pm$ 0.14            |
| Aspirin   | 12.5                       | 20.18 $\pm$ 1.34            | 17.81 $\pm$ 0.99            |
|           | 25                         | 34.83 $\pm$ 0.71            | 29.61 $\pm$ 0.38            |
|           | 50                         | 50.21 $\pm$ 1.10            | 55.74 $\pm$ 0.95            |
|           | 100                        | 84.04 $\pm$ 1.23            | 93.92 $\pm$ 0.23            |
|           | 200                        | 93.95 $\pm$ 0.14            | 98.65 $\pm$ 0.15            |

Note: - SD: standard deviation

**Table S15.** Percentage inhibition of compounds 3, 12 and aspirin on AA-induced platelet aggregation at specific concentrations

| S. no. | Concentration ( $\mu\text{g/mL}$ ) | % inhibition        |                      |                  |
|--------|------------------------------------|---------------------|----------------------|------------------|
|        |                                    | Compound 3 $\pm$ SD | Compound 12 $\pm$ SD | Aspirin $\pm$ SD |
| 1      | 62.5                               | 49.48 $\pm$ 0.71    | 45.39 $\pm$ 0.97     | 41.78 $\pm$ 0.93 |
| 2      | 125                                | 65.59 $\pm$ 0.27    | 59.81 $\pm$ 0.54     | 56.99 $\pm$ 0.27 |
| 3      | 250                                | 66.53 $\pm$ 0.54    | 60.42 $\pm$ 0.27     | 57.93 $\pm$ 0.27 |
| 4      | 500                                | 66.99 $\pm$ 0.54    | 61.69 $\pm$ 0.71     | 58.87 $\pm$ 0.27 |
| 5      | 1000                               | 68.73 $\pm$ 0.71    | 62.77 $\pm$ 0.58     | 60.09 $\pm$ 0.46 |

Note: - SD: standard deviation

**SMILES**

**Table S16.** SMILES for compounds given in the manuscript

| Compounds | SMILES                                                                |
|-----------|-----------------------------------------------------------------------|
| 1         | <chem>OC1=CC=C(NC(C2=CC=CC=C2OC(C)=O)=O)C=C1</chem>                   |
| 2         | <chem>O=C(NC(NC1=CC=C(O)C=C1)=S)C2=C(OC(C)=O)C=CC=C2</chem>           |
| 3         | <chem>OC1=CC=C(NC(NNC(C2=C(OC(C)=O)C=CC=C2)=O)=S)C=C1</chem>          |
| 4         | <chem>S=C1N(C2=CC=C(O)C=C2)C(C3=C(OC(C)=O)C=CC=C3)=NN1</chem>         |
| 5         | <chem>OC1=CC=CC=C1C(NC2=CC=C(O)C=C2)=O</chem>                         |
| 6         | <chem>O=C(NC(NC1=CC=C(O)C=C1)=S)C2=CC=CC=C2O</chem>                   |
| 7         | <chem>OC1=CC=C(NC(NNC(C2=CC=CC=C2O)=O)=S)C=C1</chem>                  |
| 8         | <chem>OC1=C(C(N2C3=CC=C(O)C=C3)=NNC2=S)C=CC=C1</chem>                 |
| 9         | <chem>CC(C(NC1=CC=C(O)C=C1)=O)C2=CC=C(CC(C)C)C=C2</chem>              |
| 10        | <chem>CC(C(NC(NC1=CC=C(O)C=C1)=S)=O)C2=CC=C(CC(C)C)C=C2</chem>        |
| 11        | <chem>OC1=CC=C(NC(NNC(C(C2=CC=C(CC(C)C)C=C2)C)=O)=S)C=C1</chem>       |
| 12        | <chem>CC(C)CC1=CC=C(C(C(N2C3=CC=C(O)C=C3)=NNC2=S)C)C=C1</chem>        |
| Aspirin   | <chem>CC(=O)OC1=CC=CC=C1C(=O)O</chem>                                 |
| Ibuprofen | <chem>CC(C)CC1=CC=C(C=C1)C(C)C(=O)O</chem>                            |
| Celecoxib | <chem>CC1=CC=C(C=C1)C2=CC(=NN2C3=CC=C(C=C3)S(=O)(=O)N)C(F)(F)F</chem> |
